# Supplementary material for: Are familial factors underlying the association between socioeconomic position and prescription medicine? A register-based study on Danish twins
Source: PubMed Central journal article supplement — BMJ Open. 2013 Nov 12;3(11):e003292. doi: 10.1136/bmjopen-2013-003292 (PMC3831100; doi:10.1136/bmjopen-2013-003292), 2013-11-12
Supplement: bmjopen-2013-003292.draft_revisions.pdf [file bmjopen-2013-003292.draft_revisions.pdf]

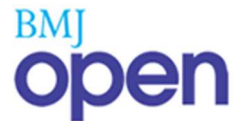

**Are familial factors underlying the association between socio-economic position and prescription medicine? A register-based study on Danish twins**

|                                 |                                                                                                                                                                                                                                                                                                                                                                                                                                                                                                                    |
|---------------------------------|--------------------------------------------------------------------------------------------------------------------------------------------------------------------------------------------------------------------------------------------------------------------------------------------------------------------------------------------------------------------------------------------------------------------------------------------------------------------------------------------------------------------|
| Journal:                        | <i>BMJ Open</i>                                                                                                                                                                                                                                                                                                                                                                                                                                                                                                    |
| Manuscript ID:                  | bmjopen-2013-003292                                                                                                                                                                                                                                                                                                                                                                                                                                                                                                |
| Article Type:                   | Research                                                                                                                                                                                                                                                                                                                                                                                                                                                                                                           |
| Date Submitted by the Author:   | 23-May-2013                                                                                                                                                                                                                                                                                                                                                                                                                                                                                                        |
| Complete List of Authors:       | Madsen, Mia; University of Southern Denmark, Unit of Epidemiology; Danish Aging Research Center, Andersen, Per; University of Copenhagen, Section of Biostatistics Gerster, Mette; University of Southern Denmark, Unit of Biostatistics Andersen, Anne-Marie; University of Copenhagen, Section of Social Medicine Osler, Merete; Research Center for Prevention and Health, Glostrup University Hospital; Danish Aging Research Center, Christensen, Kaare; University of Southern Denmark, Unit of Epidemiology |
| <b>Primary Subject Heading</b>: | Epidemiology                                                                                                                                                                                                                                                                                                                                                                                                                                                                                                       |
| Secondary Subject Heading:      | Epidemiology, Genetics and genomics, Pharmacology and therapeutics, Research methods, Health services research                                                                                                                                                                                                                                                                                                                                                                                                     |
| Keywords:                       | EPIDEMIOLOGY, GENETICS, SOCIAL MEDICINE                                                                                                                                                                                                                                                                                                                                                                                                                                                                            |
|                                 |                                                                                                                                                                                                                                                                                                                                                                                                                                                                                                                    |

SCHOLARONE™  
Manuscripts

only

1  
2  
3  
4 **Are familial factors underlying the association between socio-economic position**  
5  
6 **and prescription medicine? A register-based study on Danish twins**  
7  
8

9 Madsen, Mia<sup>1,2</sup>; Andersen, Per<sup>3</sup>; Gerster, Mette<sup>4</sup>; Andersen, Anne-Marie<sup>5</sup>; Osler, Merete<sup>6,2</sup>;  
10  
11 Christensen, Kaare<sup>1</sup>  
12  
13

14  
15  
16 Affiliations:  
17

- 18 1. University of Southern Denmark - Unit of Epidemiology  
19 Odense C Denmark  
20  
21  
22 2. Danish Aging Research Center  
23 Odense Denmark  
24  
25 3. University of Copenhagen - Section of Biostatistics  
26  
27 Copenhagen Denmark  
28  
29 4. University of Southern Denmark - Unit of Biostatistics  
30 Odense Denmark  
31  
32  
33 5. University of Copenhagen - Section of Social Medicine  
34 Copenhagen United Kingdom  
35  
36  
37  
38 6. Research Center for Prevention and Health - Glostrup University Hospital  
39 Glostrup Denmark  
40  
41  
42  
43

44 **Word Count:** 3451  
45

46 **Reference Count:** 41  
47

48 **Keywords:** EPIDEMIOLOGY, GENETICS, SOCIAL MEDICINE  
49  
50  
51  
52  
53  
54  
55  
56  
57  
58  
59  
60

**Abstract:**

Objectives: Although well-established, the association between socio-economic position and health and health behavior is not clearly understood and it has been speculated that familial factors may be underlying the association. The objective was to compare prescription fillings within twin pairs who are partly or fully genetically identical and share childhood exposures.

Design: Twin cohort study.

Setting: Denmark.

Participants: Data from the Danish Twin Registry was linked to registers in Statistics Denmark and the Danish Registry of Medicinal Product statistics. A total of 8582 monozygotic (MZ) and 15,788 dizygotic same sexed (DZSS) twins were included.

Outcome measures: Number of prescription fillings during follow-up (1995-2005) was analyzed according to education and income. Results of unpaired and intra-pair analyses were compared.

Results: An inverse social gradient in filling of prescriptions for all-purpose and system-specific drugs was observed in the unpaired analyses. In the intra-pair analyses, associations were attenuated some in DZSS and more in MZ twins. Filling of CNS-drugs was still strongly associated with income in the intra-pair analyses.

Conclusions: Familial factors seem to account for at least part of the observed social inequality in filling of prescription medicine.

## ARTICLE SUMMARY

### Article focus

- To investigate if the association between socio-economic factors and filling of drug prescriptions persists after controlling for genetic and childhood factors shared within twins.

### Key messages

- The inverse association between socio-economic factors and filling of prescription medicine show substantial attenuation in intra-pair analyses of twins, except for drugs targeting the neurologic system.
- Greater attenuation within monozygotic than dizygotic same sex twins.
- Familial factors seem to account for at least part of the observed social inequality in fillings of prescription medicine.

### Strengths and limitations

- This study is based on nation-wide register data covering more than a decade, and we present results from a largely unselected population of more than 8000 monozygotic and 15,000 dizygotic same sexed twins.
- This is the first twin study on health inequalities to report such clear-cut findings with sufficient power for meaningful interpretation of intra-pair analyses and for comparison of zygosity-specific results.
- Prescription fillings are not a perfect measure of health status, but we still argue that it is an inventive and fairly valid indicator in a Danish setting where prescription medicine has to be prescribed by a medical doctor and accounts for 96% of the total drug sale.
- The twin study is clearly a powerful approach, but when interpreting findings alternative explanations for the pattern of attenuation should be considered, including measurement error and unshared confounding. However, in this case we find it unlikely that these potential sources of bias could fully explain our findings.

## INTRODUCTION

Social inequalities in health and health behaviour have been widely demonstrated in many societies, including the Scandinavian countries[1]. Often social disparities in health are not confined to the most marginalized groups of society but are expressed as a gradient over the entire spectrum of social stratification[2]. The inverse relationship between socio-economic position (SEP) and health has consistently been observed across different social indicators and for numerous types of health outcomes[3, 4]. Use of prescription medicine is one health-related outcome that has been found to be socially patterned, where Danish data have shown a greater use among people with low SEP compared to people with high SEP[5, 6]. Denmark has a tax financed decentralized health care system with a partly need-dependent reimbursement system for outpatient prescription drugs. All prescription-drugs have to be prescribed by a medical doctor and, compared to a number of other countries, prescription medicine constitute a fairly large proportion of the total drug sale in Denmark (96%)[7]. Many studies have shown substantially reduced social differences in drug use when health status have been taken into account[6, 8, 9], which may indicate that filling of prescription medicine to a large extent reflects health status. This is supported by the fact that comorbidity indices, based on prescription drug dispensings, have been established as strong predictors of mortality[10], and that drug use has proven to be a valid indicator of self-rated health[11, 12]. However, other factors such as health care seeking behaviour and access to health care[13, 14] may also influence drug use, but the social gradient in these factors would, theoretically, be expected to be opposite that of health status, i.e. greater drug use among people with high SEP compared to low SEP. Such a positive association is generally not supported by the existing Danish literature[5, 6, 15].

Although well-established, the inverse association between SEP and health and health behavior is not clearly understood but is likely to be driven via a number of different pathways, including material deprivation, behavioural factors, and psychological factors[16]. It has also been suggested that it is not SEP in adulthood per se that influences health, but underlying familial factors already at play in early life [17, 18].

With the discordant twin pair design, it is possible to investigate the effect of adult SEP on prescription fillings eliminating confounding from factors shared by a pair of twins, exploiting that twins are partly or fully genetically identical and have experienced a similar childhood environment due to their common upbringing. This approach has been applied in a number of previous twin studies investigating different health outcomes, including mortality[19], hospitalizations[20], breast cancer[21], and also softer endpoints such as depression

1  
2  
3  
4 scores and self-rated health[22, 23]. However, the majority of these studies suffer from power limitations either  
5  
6 due to small sample sizes and/or rare outcomes making interpretations difficult.

7  
8 In this study we aimed to investigate if there was an effect of SEP in adulthood on the number of prescription  
9  
10 fillings above and beyond the effect of shared familial factors. Filling of prescription medicine is a quantitative  
11  
12 health measure rendering sufficient power for the intra-pair comparisons. Differences in genetic relatedness  
13  
14 between monozygotic (MZ) (genetically identical) and dizygotic (DZ) twins (share on average 50% of  
15  
16 segregating genes) may further give an indication of the possible types of confounding (i.e. genetic or  
17  
18 environmental factors). In a theoretical situation of no measurement error and no confounding from unshared  
19  
20 factors, genetic confounding would be indicated if an observed social gradient in prescription medicine was  
21  
22 partly attenuated in DZ twins and fully attenuated in MZ twins, when shared familial factors had been taken into  
23  
24 account. Likewise, an attenuation of similar size in DZ and MZ twins would be compatible with shared  
25  
26 environmental confounding. Finally, to support a SEP-effect on prescription fillings not due to confounding from  
27  
28 shared familial factors, the association would have to persist in both DZ and MZ twins.

29  
30 To support the utility of prescription medicine as a health indicator we also analysed its association with  
31  
32 mortality.  
33  
34  
35  
36  
37  
38  
39  
40  
41  
42  
43  
44  
45  
46  
47  
48  
49  
50  
51  
52  
53  
54  
55  
56  
57  
58  
59  
60

## METHODS

### Study population

Data from the Danish Twin Registry was linked with information in the Danish Registry of Medicinal Products and administrative registers in Statistics Denmark. The study population consisted of 24 370 twins, including 8582 monozygotic and 15 788 dizygotic same sex twins (DZSS), who were born during 1921-1965 and alive and resident in Denmark at the beginning of follow-up (January 1 1995), after exclusions due to triplets (n=384) unknown zygosity (UZ) (n=3731), and dizygotic opposite sex pairs (DZOS) (n=16 710), missing data on education or income (n=845), and non-intact twin pairs in which one twin was dead, emigrated, or had missing information (n=2847). To evaluate the representativeness of the results from the unpaired twin analyses, we also analysed a 5% population-based sample of the Danish population (n=137 300).

### Social indicators

We used information on highest attained education in 1995 at age 30+ of the study population, categorized according to the International Standard Classification of Education of 1997[24] into: primary/lower secondary education (basic compulsory education), upper secondary education (secondary), and tertiary education (Bachelor's degree and above). Income was measured as an average of the equivalised gross household income (Danish currency) in 1994-1995, grouped into quartiles within each birth cohort. "Equivalised" income is adjusted to take into account that households can share resources. Inspired by the standard OECD equivalence scale[25], the household-denominator was constructed according to an equivalence scale that assigned a value of 1 to the first household member, of 0.7 to the second household member and of 0.5 to each additional household member.

### Prescription medicine

The Danish Registry of Medicinal Products contains information on the total sale of prescription medicine in Denmark registered by the pharmacies via a computerized accounting system. The drug information is recorded according to the Anatomical Therapeutic Chemical classification system (ATC)[26] where the active substances in drugs are divided into different groups, primarily according to the organ system on which they act. Other information includes date of dispensing and *daily defined doses* (DDD), defined as the assumed average maintenance dose per day for a drug used for its main indication in adults[26]. Outcomes of interest were

1  
2  
3  
4 defined as the number of prescription fillings during follow-up for all-purpose medication (excluding the ATC-  
5 groups Q, which is for veterinary use, and G02B and G03A, which are for contraceptive use) and four groups of  
6 system-specific medication: ATC-C (circulatory system), ATC-N (nervous system), ATC-R (respiratory system)  
7 and ATC-A (alimentary tract/metabolism). If no ATC-code was assigned a prescription, it was excluded (1%).  
8  
9  
10  
11 DDD was used as a supplementary outcome measure.  
12  
13

### 14 15 **Other covariates**

16  
17 Sex and age were included in the analyses. Analyses were performed separately for MZ and DZSS twins. Zygosity  
18 had previously been determined by questionnaire[27], a method that has proven valid with an overall  
19 misclassification frequency of less than 5% validated against a classification based on genetic markers [28].  
20  
21  
22  
23

### 24 25 **Data analysis**

26  
27 Analyses were carried out using Cox regression for recurrent events (proportional means regression), thereby  
28 accommodating multiple events (prescription fillings) per individual[29]. Age was used as underlying time-  
29 variable and subjects were followed from age at baseline to the age at end of follow-up (Dec 31 2005) or death or  
30 emigration, and the timing of each prescription filling during this period was recorded. Both unpaired and intra-  
31 pair analyses were performed. In the unpaired analyses robust standard errors were used to account for the  
32 interdependence of observations within pairs and within each individual. Results of the unpaired analyses were  
33 compared to the intra-pair analyses, which were performed using a stratified Cox model:  $EN_{ij}(t) = \mu_{0j}(t)e^{\beta'z_{ij}}$ . Here  
34  $EN_{ij}(t)$  denotes the mean number of prescription fillings at time  $t$  for an individual  $i$  belonging to twin pair  $j$ ,  $\mu_{0j}(t)$   
35 is the pair-specific baseline mean, and  $e^{\beta}$  is the effect of the covariates adjusted for shared familial factors. Thus,  
36 in this analysis the mean number of prescription fillings were compared within twin pairs, thereby controlling  
37 for familial factors shared within a pair of twins. In the stratified model only SEP-discordant twin pairs  
38 contribute information to the beta-parameter for SEP, although concordant pairs may contribute information to  
39 other beta-parameters.  
40  
41  
42  
43  
44  
45  
46  
47  
48  
49  
50

51 As counting process models do not allow simultaneous events, only one prescription of interest per day was  
52 included in the analysis.  
53  
54

55 Analyses were performed separately for zygosity and sex, and potential interactions between the social  
56 indicators and zygosity, sex, and age, respectively, were evaluated by including interaction terms in the models  
57  
58  
59  
60



1  
2  
3  
4 and using Wald test-statistics. To analyse the association between prescriptions and mortality, we used a Cox  
5 regression model, continuously updating the number of prescription fillings over time.  
6  
7

### 8 9 **Subanalyses**

10 Since DDD may reflect the actual drug use more precisely than number of prescription fillings, mean DDD were  
11 also analysed by means of a fixed-effects linear regression model taking censoring into account[30]. This was  
12 treated as a subanalysis due to the highly right-skewed distribution of DDD, making linear regression a less  
13 optimal choice of model.  
14  
15  
16  
17  
18  
19

20  
21 Permission for linkage and use of data for this study was obtained from the Danish Data Protection Board (2000-  
22 54-0047).  
23  
24  
25  
26  
27  
28  
29  
30  
31  
32  
33  
34  
35  
36  
37  
38  
39  
40  
41  
42  
43  
44  
45  
46  
47  
48  
49  
50  
51  
52  
53  
54  
55  
56  
57  
58  
59  
60

1  
2  
3  
4  
5  
6  
7  
8  
9  
10  
11  
12  
13  
14  
15  
16  
17  
18  
19  
20  
21  
22  
23  
24  
25  
26  
27  
28  
29  
30  
31  
32  
33  
34  
35  
36  
37  
38  
39  
40  
41  
42  
43  
44  
45  
46  
47  
48  
49  
50  
51  
52  
53  
54  
55  
56  
57  
58  
59  
60

**RESULTS**

According to table 1, showing the distribution of education and income in the population, men were better educated than women. Generally, the education of the twin population was comparable to that of the population-based sample. Only UZ twins had a markedly lower educational status and a higher proportion of missing information. The table also shows the mean income within each quartile. Twins have a somewhat higher mean income compared to the population-based sample

For peer review only

**Table 1: Descriptives on Educational Status and Income in a 5% Population Based Sample (n=144749) and a Population of Danish Twins (n=48887), Including Intact and Non-intact Twin Pairs, Stratified on Sex and Zygosity.**

|                                       | 5% population sample |                |        |        | All twins<br>(n=48887) |                | DZSS<br>(n=18426) |        | MZ<br>(n=9636) |                | DZOS<br>(n=16710) |                | UZ<br>(n=3731) |                |      |     |
|---------------------------------------|----------------------|----------------|--------|--------|------------------------|----------------|-------------------|--------|----------------|----------------|-------------------|----------------|----------------|----------------|------|-----|
|                                       | N                    | % <sup>a</sup> | Mean   | SD     | n                      | % <sup>a</sup> | Mean              | SD     | n              | % <sup>a</sup> | n                 | % <sup>a</sup> | n              | % <sup>a</sup> |      |     |
| <b>Sex</b>                            |                      |                |        |        |                        |                |                   |        |                |                |                   |                |                |                |      |     |
| <b>Educational status<sup>b</sup></b> |                      |                |        |        |                        |                |                   |        |                |                |                   |                |                |                |      |     |
| <i>Men</i>                            |                      |                |        |        |                        |                |                   |        |                |                |                   |                |                |                |      |     |
| Primary                               | 23550                | 32             |        |        | 8909                   | 35             |                   |        | 3553           | 36             | 1517              | 31             | 2882           | 34             | 957  | 43  |
| Secondary                             | 31336                | 43             |        |        | 11237                  | 44             |                   |        | 4309           | 44             | 2292              | 47             | 3834           | 45             | 802  | 36  |
| Tertiary                              | 13722                | 19             |        |        | 4515                   | 18             |                   |        | 1685           | 17             | 963               | 20             | 1530           | 18             | 337  | 15  |
| Missing                               | 4072                 | 6              |        |        | 800                    | 3              |                   |        | 310            | 3              | 128               | 3              | 208            | 2              | 154  | 7   |
| Total                                 | 72680                | 100            |        |        | 25461                  | 100            |                   |        | 9857           | 100            | 4900              | 101            | 8454           | 99             | 2250 | 101 |
| <i>Women</i>                          |                      |                |        |        |                        |                |                   |        | 3857           | 45             | 1903              | 40             | 3633           | 44             | 789  | 53  |
| Primary                               | 31215                | 43             |        |        | 10182                  | 44             |                   |        | 2868           | 34             | 1730              | 37             | 2807           | 34             | 400  | 27  |
| Secondary                             | 23809                | 33             |        |        | 7805                   | 34             |                   |        | 1696           | 20             | 1004              | 21             | 1705           | 21             | 208  | 14  |
| Tertiary                              | 14229                | 20             |        |        | 4613                   | 20             |                   |        | 148            | 2              | 99                | 2              | 111            | 1              | 84   | 6   |
| Missing                               | 2816                 | 4              |        |        | 442                    | 2              |                   |        | 8569           | 101            | 4736              | 100            | 8256           | 100            | 1481 | 100 |
| Total                                 | 72069                | 100            |        |        | 23042                  | 100            |                   |        | 3553           | 36             | 1517              | 31             | 2882           | 34             | 957  | 43  |
|                                       |                      |                |        |        |                        |                |                   |        | 4309           | 44             | 2292              | 47             | 3834           | 45             | 802  | 36  |
| <b>Income (DKK)</b>                   |                      |                |        |        |                        |                |                   |        |                |                |                   |                |                |                |      |     |
| <i>Men</i>                            |                      |                |        |        |                        |                |                   |        |                |                |                   |                |                |                |      |     |
| 1st quartile                          | 17348                | 24             | 88537  | 28373  | 5931                   | 24             | 92330             | 27563  | 2251           | 23             | 1061              | 22             | 1929           | 23             | 690  | 31  |
| 2nd quartile                          | 17510                | 24             | 145676 | 25887  | 6523                   | 24             | 149367            | 24179  | 2563           | 26             | 1208              | 25             | 2201           | 26             | 551  | 24  |
| 3rd quartile                          | 17976                | 25             | 191360 | 34863  | 6769                   | 25             | 196738            | 31365  | 2612           | 27             | 1375              | 28             | 2246           | 27             | 536  | 24  |
| 4th quartile                          | 18228                | 25             | 311232 | 141784 | 5960                   | 25             | 314180            | 225459 | 2340           | 24             | 1218              | 25             | 2006           | 24             | 396  | 18  |
| Missing                               | 1618                 | 2              |        |        | 278                    | 2              |                   |        | 91             | 1              | 38                | 1              | 72             | 1              | 77   | 3   |
| Total                                 | 72680                | 100            |        |        | 25461                  | 100            |                   |        | 9875           | 101            | 4900              | 101            | 8454           | 101            | 2250 | 100 |
| <i>Women</i>                          |                      |                |        |        |                        |                |                   |        | 2174           | 25             | 1158              | 24             | 2200           | 27             | 538  | 36  |
| 1st quartile                          | 18958                | 26             | 88201  | 26316  | 6070                   | 26             | 91205             | 25698  | 2316           | 27             | 1222              | 26             | 2186           | 27             | 353  | 24  |
| 2nd quartile                          | 18219                | 25             | 142746 | 27689  | 6077                   | 25             | 146427            | 25562  | 2152           | 25             | 1224              | 26             | 2106           | 26             | 313  | 21  |
| 3rd quartile                          | 17753                | 25             | 18942  | 36067  | 5795                   | 25             | 194968            | 33291  | 1882           | 22             | 1097              | 23             | 1730           | 21             | 232  | 16  |
| 4th quartile                          | 16126                | 22             | 308876 | 225888 | 4941                   | 22             | 312063            | 173113 | 45             | 1              | 35                | 1              | 34             | 0              | 45   | 3   |
| Missing                               | 1013                 | 1              |        |        | 159                    | 1              |                   |        | 8569           | 100            | 4736              | 100            | 8256           | 101            | 1481 | 100 |
| Total                                 | 72069                | 99             |        |        | 23042                  | 99             |                   |        | 2251           | 23             | 1061              | 22             | 1929           | 23             | 690  | 31  |

DZSS=Dizygotic same sex twins; MZ=Monozygotic twins; DZOS=Dizygotic opposite sex twins; UZ=Unknown zygosity, <sup>a</sup>May not sum to 100 because of rounding, <sup>b</sup>International Standard Classification of Education, <sup>c</sup>Average of equalized gross household income in 1994-1995 in quartiles. DKK=Danish Crowns.

The proportion of education-discordant twin pairs was 30% for MZ twins and 42% for DZSS twins, while 61% MZ twins and 68% DZSS twins were discordant on income (table 2).

**Table 2: Descriptives on Intra-Pair Discordances on Educational Status and Income, Stratified on Zygosity in a Population of Danish Twins (n=24370).**

|                                                      | DZSS<br>(n=15788) |                | MZ<br>(n=8582) |                |
|------------------------------------------------------|-------------------|----------------|----------------|----------------|
|                                                      | n                 | % <sup>a</sup> | n              | % <sup>a</sup> |
| <b>Educational status</b>                            |                   |                |                |                |
| Primary vs Secondary                                 | 3590              | 23             | 1460           | 17             |
| Primary vs Tertiary                                  | 900               | 6              | 316            | 4              |
| Secondary vs Tertiary                                | 2194              | 14             | 820            | 10             |
| Any discordance                                      | 6684              | 42             | 2596           | 30             |
| <b>Income</b>                                        |                   |                |                |                |
| 1 <sup>st</sup> quartile vs 2 <sup>nd</sup> quartile | 2048              | 13             | 1072           | 12             |
| 1 <sup>st</sup> quartile vs 3 <sup>rd</sup> quartile | 1706              | 11             | 754            | 9              |
| 1 <sup>st</sup> quartile vs 4 <sup>th</sup> quartile | 1158              | 7              | 490            | 6              |
| 2 <sup>nd</sup> quartile vs 3 <sup>rd</sup> quartile | 2266              | 14             | 1194           | 14             |
| 2 <sup>nd</sup> quartile vs 4 <sup>th</sup> quartile | 1574              | 10             | 682            | 8              |
| 3 <sup>rd</sup> quartile vs 4 <sup>th</sup> quartile | 2000              | 13             | 1080           | 13             |
| Any discordance                                      | 10 752            | 68             | 5272           | 61             |

DZSS= Dizygotic same sexed twins; MZ= Monozygotic twins; <sup>a</sup>May not sum to 100 because of rounding.

In the twin population, 1.9% did not redeem any drug prescriptions during the total follow-up period and 25% redeemed less than one prescription/year, on average (results not shown). Overall, women filled more prescriptions than men for all age groups and the number of prescription fillings increased with age in both sexes (table 3).

**Table 3: The Mean Number of Prescription Fillings After 1 and 10 Years of Follow-up in a 5% Population Based Sample and a Population of Danish Twins, Stratified on Age and Sex.**

| Type of drugs                                    | Nelson Aalen Cumulative Hazard |          |                  |          |
|--------------------------------------------------|--------------------------------|----------|------------------|----------|
|                                                  | 5 % pop. (n= 137 300)          |          | Twins (n=24 370) |          |
| Age                                              | 1 year                         | 10 years | 1 year           | 10 years |
| Sex                                              |                                |          |                  |          |
| <b>All purpose</b>                               |                                |          |                  |          |
| 30-44 years                                      |                                |          |                  |          |
| Men                                              | 2.5                            | 28.7     | 2.2              | 25.9     |
| Women                                            | 4.1                            | 44.5     | 3.8              | 41.1     |
| 45-59 years                                      |                                |          |                  |          |
| Men                                              | 3.6                            | 47.4     | 3.3              | 43.1     |
| Women                                            | 6.0                            | 71.9     | 5.7              | 68.4     |
| 60+ years                                        |                                |          |                  |          |
| Men                                              | 6.4                            | 87.5     | 5.8              | 82.2     |
| Women                                            | 8.3                            | 105.4    | 7.2              | 95.7     |
| <b>Circulatory system (ATC-C)</b>                |                                |          |                  |          |
| 30-44 years                                      |                                |          |                  |          |
| Men                                              | 0.1                            | 3.3      | 0.1              | 2.9      |
| Women                                            | 0.2                            | 4.2      | 0.2              | 3.6      |
| 45-59 years                                      |                                |          |                  |          |
| Men                                              | 0.7                            | 12.6     | 0.6              | 10.6     |
| Women                                            | 0.8                            | 13.8     | 0.7              | 13.0     |
| 60+ years                                        |                                |          |                  |          |
| Men                                              | 1.9                            | 29.6     | 1.7              | 27.4     |
| Women                                            | 1.9                            | 30.0     | 1.6              | 26.7     |
| <b>Nervous system (ATC-N)</b>                    |                                |          |                  |          |
| 30-44 years                                      |                                |          |                  |          |
| Men                                              | 0.8                            | 9.8      | 0.7              | 8.6      |
| Women                                            | 1.1                            | 14.5     | 1.0              | 13.3     |
| 45-59 years                                      |                                |          |                  |          |
| Men                                              | 1.2                            | 14.6     | 1.2              | 13.9     |
| Women                                            | 2.1                            | 25.0     | 2.0              | 24.1     |
| 60+ years                                        |                                |          |                  |          |
| Men                                              | 1.8                            | 24.4     | 1.6              | 22.2     |
| Women                                            | 3.1                            | 39.2     | 2.7              | 35.8     |
| <b>Respiratory system (ATC-R)</b>                |                                |          |                  |          |
| 30-44 years                                      |                                |          |                  |          |
| Men                                              | 0.3                            | 3.9      | 0.3              | 3.6      |
| Women                                            | 0.6                            | 6.5      | 0.5              | 5.7      |
| 45-59 years                                      |                                |          |                  |          |
| Men                                              | 0.5                            | 5.8      | 0.4              | 5.0      |
| Women                                            | 0.8                            | 9.8      | 0.7              | 9.1      |
| 60+ years                                        |                                |          |                  |          |
| Men                                              | 1.1                            | 14.4     | 0.9              | 12.5     |
| Women                                            | 1.2                            | 14.8     | 1.0              | 12.8     |
| <b>Alimentary tract &amp; metabolism (ATC-A)</b> |                                |          |                  |          |
| 30-44 years                                      |                                |          |                  |          |
| Men                                              | 0.3                            | 3.5      | 0.2              | 3.1      |
| Women                                            | 0.4                            | 5.0      | 0.4              | 4.1      |
| 45-59 years                                      |                                |          |                  |          |
| Men                                              | 0.5                            | 7.6      | 0.5              | 6.6      |
| Women                                            | 0.7                            | 9.6      | 0.7              | 8.6      |
| 60+ years                                        |                                |          |                  |          |
| Men                                              | 1.1                            | 15.4     | 1.1              | 15.0     |
| Women                                            | 1.3                            | 18.3     | 1.0              | 16.4     |

1  
2  
3  
4 ATC-N drug prescriptions were the most frequently redeemed in the youngest age group. The mean number of  
5  
6 prescription fillings in the twin population was similar to that in the population-based sample, although slightly  
7  
8 higher in the population-based sample.

9  
10 The results of an analysis of the association between SEP and prescription fillings for all-purpose and system-  
11  
12 specific drugs are presented in table 4.

13  
14  
15  
16  
17  
18  
19  
20  
21  
22  
23  
24  
25  
26  
27  
28  
29  
30  
31  
32  
33  
34  
35  
36  
37  
38  
39  
40  
41  
42  
43  
44  
45  
46  
47  
48  
49  
50  
51  
52  
53  
54  
55  
56  
57  
58  
59  
60

For peer review only

Table 4: The ratio (MR) of the mean number of prescription fillings (1995-2005) for all-purpose and system-specific drugs according to educational status and income in a 5% population-based sample (137 300) and a population of Danish twins (n=24 370), showing results from unpaired and intra-pair analyses stratified on zygosity.

| Type of drug                      | Unpaired analysis <sup>a</sup> |           |              |           |             |           | Intra-pair analysis <sup>b</sup> |           |             |           |
|-----------------------------------|--------------------------------|-----------|--------------|-----------|-------------|-----------|----------------------------------|-----------|-------------|-----------|
|                                   | Pop % n=137300                 |           | DZSS n=15788 |           | MZ n=8582   |           | DZSS                             |           | MZ          |           |
| Educational status                | MR                             | CI 95%    | MR           | CI 95%    | MR          | CI 95%    | MR                               | CI 95%    | MR          | CI 95%    |
| <i>All purpose</i>                |                                |           |              |           |             |           |                                  |           |             |           |
| Secondary                         | <b>0.90</b>                    | 0.90-0.90 | <b>0.90</b>  | 0.86-0.95 | <b>0.87</b> | 0.81-0.93 | <b>0.88</b>                      | 0.84-0.93 | 0.97        | 0.91-1.03 |
| Tertiary                          | <b>0.82</b>                    | 0.82-0.83 | <b>0.85</b>  | 0.80-0.91 | <b>0.83</b> | 0.76-0.90 | <b>0.86</b>                      | 0.80-0.92 | 0.95        | 0.86-1.05 |
| 2nd quartile                      | <b>0.78</b>                    | 0.78-0.78 | <b>0.81</b>  | 0.76-0.85 | <b>0.81</b> | 0.75-0.88 | <b>0.86</b>                      | 0.82-0.91 | <b>0.91</b> | 0.85-0.97 |
| 3rd quartile                      | <b>0.72</b>                    | 0.72-0.73 | <b>0.72</b>  | 0.69-0.77 | <b>0.74</b> | 0.69-0.80 | <b>0.79</b>                      | 0.75-0.83 | <b>0.87</b> | 0.81-0.94 |
| 4th quartile                      | <b>0.70</b>                    | 0.70-0.70 | <b>0.71</b>  | 0.67-0.75 | <b>0.70</b> | 0.65-0.77 | <b>0.76</b>                      | 0.72-0.81 | <b>0.87</b> | 0.81-0.94 |
| <i>Circulatory system (ATC-C)</i> |                                |           |              |           |             |           |                                  |           |             |           |
| Secondary                         | <b>0.95</b>                    | 0.95-0.96 | <b>0.92</b>  | 0.85-0.99 | <b>0.87</b> | 0.78-0.96 | <b>0.85</b>                      | 0.79-0.92 | <b>0.89</b> | 0.81-0.97 |
| Tertiary                          | <b>0.79</b>                    | 0.79-0.80 | <b>0.78</b>  | 0.71-0.87 | <b>0.70</b> | 0.60-0.82 | <b>0.80</b>                      | 0.71-0.90 | 0.93        | 0.79-1.08 |
| 2nd quartile                      | <b>0.91</b>                    | 0.90-0.91 | <b>0.94</b>  | 0.87-1.03 | 0.94        | 0.84-1.06 | 1.08                             | 0.99-1.17 | 0.95        | 0.87-1.05 |
| 3rd quartile                      | <b>0.83</b>                    | 0.83-0.84 | <b>0.86</b>  | 0.78-0.94 | <b>0.86</b> | 0.76-0.97 | 0.97                             | 0.89-1.06 | 0.98        | 0.89-1.08 |
| 4th quartile                      | <b>0.79</b>                    | 0.79-0.79 | <b>0.82</b>  | 0.74-0.90 | <b>0.85</b> | 0.74-0.97 | 0.97                             | 0.88-1.08 | 0.94        | 0.84-1.05 |
| <i>Nervous system (ATC-N)</i>     |                                |           |              |           |             |           |                                  |           |             |           |
| Secondary                         | <b>0.80</b>                    | 0.80-0.80 | <b>0.87</b>  | 0.79-0.96 | <b>0.77</b> | 0.67-0.88 | <b>0.85</b>                      | 0.77-0.94 | 1.00        | 0.86-1.17 |
| Tertiary                          | <b>0.71</b>                    | 0.71-0.71 | <b>0.77</b>  | 0.67-0.88 | <b>0.75</b> | 0.61-0.92 | <b>0.78</b>                      | 0.67-0.90 | 0.91        | 0.73-1.16 |
| 2nd quartile                      | <b>0.61</b>                    | 0.60-0.61 | <b>0.61</b>  | 0.55-0.68 | <b>0.60</b> | 0.52-0.70 | <b>0.68</b>                      | 0.61-0.75 | <b>0.75</b> | 0.67-0.87 |
| 3rd quartile                      | <b>0.49</b>                    | 0.49-0.50 | <b>0.47</b>  | 0.43-0.53 | <b>0.47</b> | 0.39-0.56 | <b>0.54</b>                      | 0.48-0.61 | <b>0.59</b> | 0.50-0.70 |
| 4th quartile                      | <b>0.44</b>                    | 0.44-0.44 | <b>0.45</b>  | 0.40-0.51 | <b>0.42</b> | 0.35-0.50 | <b>0.50</b>                      | 0.45-0.57 | <b>0.60</b> | 0.50-0.71 |
| <i>Respiratory system (ATC-R)</i> |                                |           |              |           |             |           |                                  |           |             |           |
| Secondary                         | <b>0.86</b>                    | 0.85-0.86 | <b>0.77</b>  | 0.67-0.87 | <b>0.82</b> | 0.69-0.98 | <b>0.83</b>                      | 0.72-0.94 | 1.00        | 0.84-1.21 |
| Tertiary                          | <b>0.81</b>                    | 0.80-0.81 | <b>0.79</b>  | 0.68-0.92 | <b>0.76</b> | 0.61-0.95 | <b>0.80</b>                      | 0.66-0.97 | 0.77        | 0.58-1.03 |
| 2nd quartile                      | <b>0.76</b>                    | 0.75-0.76 | <b>0.76</b>  | 0.66-0.87 | <b>0.79</b> | 0.65-0.98 | <b>0.86</b>                      | 0.75-0.99 | 1.04        | 0.86-1.25 |

|                                                  |             |           |             |           |             |           |             |           |      |           |
|--------------------------------------------------|-------------|-----------|-------------|-----------|-------------|-----------|-------------|-----------|------|-----------|
| 3rd quartile                                     | <b>0.68</b> | 0.68-0.69 | <b>0.74</b> | 0.64-0.86 | <b>0.69</b> | 0.57-0.85 | <b>0.85</b> | 0.73-0.98 | 1.02 | 0.84-1.24 |
| 4th quartile                                     | <b>0.63</b> | 0.63-0.63 | <b>0.69</b> | 0.59-0.81 | <b>0.64</b> | 0.52-0.79 | <b>0.83</b> | 0.71-0.96 | 1.25 | 1.04-1.51 |
| <i>Alimentary tract &amp; metabolism (ATC-A)</i> |             |           |             |           |             |           |             |           |      |           |
| Secondary                                        | <b>0.84</b> | 0.84-0.84 | <b>0.85</b> | 0.77-0.94 | <b>0.81</b> | 0.71-0.93 | <b>0.84</b> | 0.75-0.94 | 0.98 | 0.85-1.14 |
| Tertiary                                         | <b>0.68</b> | 0.67-0.68 | <b>0.71</b> | 0.62-0.82 | <b>0.64</b> | 0.53-0.77 | <b>0.81</b> | 0.68-0.96 | 0.94 | 0.76-1.17 |
| 2nd quartile                                     | <b>0.74</b> | 0.74-0.75 | <b>0.73</b> | 0.65-0.81 | <b>0.83</b> | 0.72-0.96 | <b>0.85</b> | 0.76-0.96 | 0.88 | 0.77-1.01 |
| 3rd quartile                                     | <b>0.64</b> | 0.64-0.65 | <b>0.63</b> | 0.56-0.71 | <b>0.77</b> | 0.66-0.90 | <b>0.77</b> | 0.68-0.87 | 0.87 | 0.75-1.02 |
| 4th quartile                                     | <b>0.61</b> | 0.61-0.61 | <b>0.60</b> | 0.53-0.68 | <b>0.65</b> | 0.55-0.77 | <b>0.76</b> | 0.67-0.88 | 0.86 | 0.72-1.02 |

DZSS=Dizygotic same sex twins; MZ=Monozygotic twins; <sup>a</sup>Unpaired analysis treating twins as individuals while taking interdependence of observations within each individual and within twin pairs into account. The interpretation of MR is the ratio of the mean number of prescriptions at a given time of e.g. an individual with a secondary or tertiary education compared to a random individual with a primary education. MRs are adjusted for age and sex. Income and education are mutually adjusted, <sup>b</sup>Intra-pair analysis of twins by inclusion of a strata statement. The interpretation of MR is the ratio of the mean number of prescriptions at a given time of a twin with a secondary or tertiary education compared to its co-twin with a primary education. Bold typography indicates statistical significance at 5% level.



1  
2  
3  
4 For all-purpose drugs, MZ twins in the highest income quartile had a 30% lower mean number of prescription  
5 fillings than MZ twins in the lowest income quartile (MR=0.70 (CI 95%; 0.65,0.77)). Similarly, MZ twins with a  
6 tertiary education had 17% lower mean number of prescription fillings than twins with a primary education  
7 (MR=0.82 (CI 95%; 0.75,0.89)). The association was slightly less strong for ATC-C drugs while stronger  
8 associations could be observed for the other system-specific drugs, particularly for ATC-N. In the unpaired  
9 analyses, no large differences could be observed between MZ and DZSS twins and there was no strong evidence  
10 for an interaction between SEP and zygosity in the unpaired analysis (education:  $P=0.81$ , income:  $P=0.95$ ). In  
11 contrast, the effect of SEP was moderated by zygosity in the intra-pair analyses (education:  $P=0.02$ , income:  
12  $P=0.05$ ), suggesting a more attenuated effect of SEP in MZ twins than in DZSS twins: In MZ twins, generally no  
13 statistically significant effect of education could be observed, while income was still somewhat associated with  
14 all-purpose medication and quite strongly with ACT-N drugs. In DZSS twins, a minor or moderate attenuation  
15 could be observed, and all effect parameters were statistically significant, except for ATC-C drugs. In the  
16 population-based sample, the associations were similar to that in the overall twin population.  
17  
18 When using DDD (for all-purpose drugs) as outcome measure (table 5), results similar to the results based on  
19 number of prescription fillings were obtained, although the attenuation patterns in MZ twins were somewhat  
20 more clear in this analysis, showing no statistically significant associations with DDD of neither education nor  
21 income. In the analysis of number of prescriptions as a predictor of mortality we found a 60% increase in  
22 mortality rate during follow-up for a person who, on average, filled 1 prescription per month during the follow-  
23 up period compared to a person without any prescription fillings (HR=1.60 (95% CI: 1.25,2.05)).  
24  
25  
26  
27  
28  
29  
30  
31  
32  
33  
34  
35  
36  
37  
38  
39  
40  
41  
42  
43  
44  
45  
46  
47  
48  
49  
50  
51  
52  
53  
54  
55  
56  
57  
58  
59  
60

**Table 5: Results from a Linear Regression Model Showing Number of Daily Defined Doses (DDD) for All-Purpose Drugs According to Educational Status and Income in a Population of Danish Twins (n=24370) Stratified on Zygosity. Results from Unpaired and Intra-Pair Analyses are Shown.**

| Educational status<br>Income | Unpaired analysis <sup>a</sup> |           | Intra-pair analysis <sup>b</sup> |           |             |           |      |          |
|------------------------------|--------------------------------|-----------|----------------------------------|-----------|-------------|-----------|------|----------|
|                              | DZSS n=15788                   |           | MZ n=8582                        |           | DZSS        |           | MZ   |          |
|                              | DDD                            | CI 95%    | DDD                              | CI 95%    | DDD         | CI 95%    | DDD  | CI 95%   |
| Secondary                    | <b>-287</b>                    | -397;-177 | <b>-289</b>                      | -440;-138 | <b>-245</b> | -399;-90  | -143 | -346;59  |
| Tertiary                     | <b>-404</b>                    | -531;-277 | <b>-424</b>                      | -606;-243 | <b>-344</b> | -557;-131 | -152 | -440;136 |
| 2nd quartile                 | <b>-401</b>                    | -541;-260 | <b>-275</b>                      | -463;-88  | <b>-219</b> | -383;-54  | 18   | -177;214 |
| 3rd quartile                 | <b>-541</b>                    | -680;-402 | <b>-451</b>                      | -638;-263 | <b>-367</b> | -535;-198 | -83  | -287;121 |
| 4th quartile                 | <b>-505</b>                    | -648;-363 | <b>-437</b>                      | -630;-243 | <b>-327</b> | -512;-142 | 16   | -209;242 |

DZSS=Dizygotic same sex twins; MZ=Monozygotic twins; <sup>a</sup>Unpaired analysis treating twins as individuals while taking interdependence of observations within each individual and within twin pairs into account. The interpretation of e.g. the education estimate is difference in the mean number of DDDs of an individual with a secondary or tertiary education compared to a random individual with a primary education. The estimates are adjusted for age and sex. Income and education are mutually adjusted <sup>b</sup>Intra-pair analysis of twins by inclusion of a fixed-effect statement. The interpretation of e.g. the education estimate is the difference in the mean number of DDDs of a twin with a secondary or tertiary education compared to its co-twin with a primary education. Bold typography indicates statistical significance at 5% level.

## DISCUSSION

In this large Danish twin population we demonstrated an inverse social gradient in fillings of prescription medicine for all-purpose and system-specific drugs. That is, a greater use of prescription medicine among those with a low SEP, in spite of their limited financial means, thus suggesting a worse health status of this group. These marginal findings are in accordance with previous Danish studies reporting an inverse social gradient in drug use[5, 6]. In the intra-pair analyses, where shared familial factors were controlled for per design, the association attenuated to a wide extent within MZ twins and somewhat less in DZSS twins. For education, there was generally no association with prescription fillings in MZ twins, except for drugs targeting the neurologic system. For income, there was still some association with all purpose and most system-specific drugs. However, no effect of income was seen in the intra-pair analyses when DDD were used as outcome measure. In spite of some variations between system-specific drugs, the overall pattern was the same as for all-purpose drugs, except for ATC-N drugs and to a lesser degree ATC-A drugs, which still showed some effect of SEP in the intra-pair analyses.

The finding of greatest attenuation in MZ twins is compatible with the scenario of genetic confounding, since MZ twins are genetically identical in contrast to DZSS twins who share on average 50% of their segregating genes. However, a number of things should be kept in mind when interpreting these findings.

First of all, part of the observed attenuation is likely caused by measurement error. Measurement error is random and therefore not shared by twins. In the intra-pair analysis, variance due to shared factors is removed, and a relatively larger proportion of exposure variance is thus due to measurement error. This will result in increasing attenuation of parameter estimates in the intra-pair analyses with increasing correlation in exposure[31], thus being most pronounced in MZ twins. However, using data from official registers it can be expected that education and income have very limited measurement error. In addition, the intra-pair correlation of education and income is not that different between MZ and DZ twins in this population and seems insufficient to explain the greater attenuation observed in MZ twins.

Twin studies generally rely on the equal environment assumption. That is, MZ and DZ twins share their environment equally. If this does not hold, i.e. if MZ twins not only share their genes but also their

1  
2  
3  
4 environment more closely than DZ twins[32], shared environmental factors could also produce a greater  
5  
6 attenuation of effect in MZ twins.  
7

8  
9  
10 In addition, twins' behaviours could be affected in reaction to each other, i.e. social interaction either by imitation  
11  
12 or differentiation. The implications of a potential imitation could be smaller within-pair differences, which could  
13  
14 be misinterpreted as confounding from underlying background factors. This may be of some concern in this  
15  
16 study since fillings of prescription medicine is likely to have a behavioural component.  
17

18  
19 Another implication of the discordant twin pair approach is that only twin pairs who are discordant on exposure  
20  
21 contribute with statistical information to the estimation of SEP-effects in the intra-pair analysis. This could  
22  
23 potentially induce bias in the comparison of the unpaired and intra-pair analysis, since the two analyses are  
24  
25 based on essentially different populations. Since MZ twins are less likely to be discordant, the selection bias may  
26  
27 be most severe in MZ twins[33]. We examined this concern by restricting the unpaired analysis only to include  
28  
29 groups with exposure-discordant twins. Results were similar in both MZ and DZ twins.  
30

31  
32 A further issue relates to the fact that twins who are discordant on exposure are special in the sense that they, in  
33  
34 spite of overlapping genes and rearing environment, differ in their SEP. Thus, unshared factors are likely to  
35  
36 explain these differences. This implies that the intra-pair analysis may still be confounded by unshared  
37  
38 confounding factors, and that this confounding may be enforced in the intra-pair analysis[31]. Generally,  
39  
40 confounding from unshared factors is thought to be more severe when confounders are less correlated than  
41  
42 exposure[31]. This may or may not be true in our case, since we can only hypothesize on the correlation of  
43  
44 unmeasured confounders. Nevertheless, education and income are less correlated than phenotypes like cognitive  
45  
46 ability[34] and BMI[35] which have previously been investigated using similar designs. In any case, as shown by  
47  
48 Frisell et al. (2012) in order for *increased* confounding to explain the *attenuation* of the association observed in  
49  
50 this study, the potential non-shared confounders would have to create a positive association between education  
51  
52 and prescription fillings. In most cases, however, we would expect a negative association, although filling of  
53  
54 prescription medicine is indeed a complex health outcome and it is theoretically possible for a confounder to  
55  
56 have a dual effect on prescription fillings by increasing the capability of getting the relevant prescriptions, while  
57  
58 at the same time reducing the need for prescription fillings. Nevertheless, health status does seem to be the main  
59  
60

1  
2  
3  
4 determinant of prescription medicine[10, 36, 37] and was clearly associated with mortality in this data. Thus, in  
5  
6 the presence of non-shared confounding we would expect the net effect of any confounding to produce a  
7  
8 negative association between education and prescription fillings resulting in bias away from the null[31]. This  
9  
10 could not explain the observed attenuation of effect in the intra-pair analyses observed in this study.

11  
12  
13 As mentioned earlier, fillings of prescription medicine is not a perfect measure for health status, but we argue  
14  
15 that the observed inverse relationship with education and income likely reflects a greater need for medicine  
16  
17 among people of lower SEP. In case that access to health care also plays a role, presumably favouring people of  
18  
19 high SEP, the social gradient in health status in this study could be underestimated. Although data did not  
20  
21 contain information on over-the-counter (OTC) medication, it only constitutes a small part of the total drug  
22  
23 consumption in Denmark, and since we were interested in drugs as an indicator of health status, it could be  
24  
25 argued that the most valid approach is to focus on drugs that require a formal medical indication (i.e.  
26  
27 prescription).

28  
29  
30 The finding of a persistent association with fillings of prescriptions for ATC-N drugs clearly stood out from the  
31  
32 general results. The possible explanation for this could be reverse causation, i.e. that poor health status affects  
33  
34 ones income and not the other way around. Income is much more sensitive to reverse causation than education,  
35  
36 which is usually obtained early in life and remains constant once it is obtained. It is likely that health conditions  
37  
38 requiring prescriptions for ATC-N drugs may affect the work ability and income of a person.

39  
40  
41 As models for counting processes only allow one event at a time, the number of prescription fillings was defined  
42  
43 as the main outcome of interest. Therefore, it was reassuring that the subanalysis on DDD led to similar results.  
44  
45

46  
47 Although the distribution of SEP-indicators and prescription fillings were not entirely identical in twins and the  
48  
49 population-based sample, the associations between SEP and prescription fillings were indeed, which supports  
50  
51 generalizability to the general population in line with previous studies that show that health and mortality in  
52  
53 twins are similar to the background population[38, 39]. Furthermore, the fact that the analysis based only on  
54  
55 discordant twin pairs show marginal results similar to those based on the total twin sample was reassuring.  
56  
57  
58  
59  
60

1  
2  
3  
4 In this study based on a comprehensive twin cohort we observed a social inequality in fillings of prescription  
5 medicine, showing fewer prescription fillings among people with high SEP. This association attenuated within  
6 twin pairs for most types of prescription-fillings, except those targeting the neurologic system. The attenuation  
7 was most pronounced in MZ twins. Several explanations may account for these findings. Measurement error can  
8 contribute to the observed attenuation of association, but it is likely to account only for a small fraction,  
9 considering the exposure and outcome measures in this study. As for potential non-shared confounding we  
10 would, if anything, expect it to bias the estimates away from the null. We therefore interpret the findings of this  
11 study as an indication that at least a part of the observed social inequality in prescription fillings is explained by  
12 shared familial factors. Previous studies have investigated the association between various SEP-indicators and  
13 health outcomes. However, most studies suffered from severe power limitations in the intra-pair analyses due to  
14 a small number of events[19, 21, 23, 40, 41]. This is not a concern in this study, where almost all of the 24 370  
15 twins contributed with information to the intra-pair analyses, thus providing some of the most powerful twin  
16 results on social inequality in health to date.  
17  
18  
19  
20  
21  
22  
23  
24  
25  
26  
27  
28  
29

### 30 **COMPETING INTERESTS**

31 None.  
32  
33  
34  
35

### 36 **FUNDING**

37 This work is supported by a grant from the VELUX Foundation (95-103-11419), a grant from the Danish Cancer  
38 Society (SU08001) and from the Danish council For Independent Research (social sciences, 09-06008). The  
39 funding bodies had no influence on the contents of this paper.  
40  
41  
42  
43

### 44 **CONTRIBUTORSHIP**

45 KC and MO formulated the original study idea and provided funding. MM, KC, MO and A-MNA further developed  
46 the study idea and design of the study. MM carried out the data analyses in collaboration with PKA and MG. All  
47 authors participated in interpretation and discussion of the findings. MM drafted the first version of the  
48 manuscript, but all authors have contributed to the revisions and have approved the final version of the paper.  
49  
50  
51  
52  
53

### 54 **DATA SHARING**

55 There are no additional data.  
56  
57  
58  
59  
60

## Reference List

1. Mackenbach JP, Stirbu I, Roskam AJ, et al. Socioeconomic inequalities in health in 22 European countries. *N Engl J Med* 2008;**358**(23):2468-2481.
2. Adler NE, Ostrove JM. Socioeconomic status and health: what we know and what we don't. *Ann N Y Acad Sci* 1999;**896**:3-15.
3. Davey SG, Hart C, Hole D, et al. Education and occupational social class: which is the more important indicator of mortality risk? *J Epidemiol Community Health* 1998;**52**(3):153-160.
4. Marmot M, Ryff CD, Bumpass LL, et al. Social inequalities in health: next questions and converging evidence. *Soc Sci Med* 1997;**44**(6):901-910.
5. Ekholm O, Kjølner M, Davidsen M, Hesse U, Eriksen L, Christensen A. Sundhed og Sygelighed i Danmark & udviklingen siden 1987 [Danish Health and Morbidity survey and trends since 1987]. Copenhagen: National Institute of Public Health; 2006.
6. Gundgaard J. Income related inequality in prescription drugs in Denmark. *Pharmacoepidemiol Drug Saf* 2005;**14**(5):307-317.
7. Ehrenstein V, Antonsen S, Pedersen L. Existing data sources for clinical epidemiology: Aarhus University Prescription Database. *Clin Epidemiol* 2010;**2**:273-279.
8. Weitoft GR, Rosen M, Ericsson O, et al. Education and drug use in Sweden--a nationwide register-based study. *Pharmacoepidemiol Drug Saf* 2008;**17**(10):1020-1028.
9. Nielsen MW, Hansen EH, Rasmussen NK. Prescription and non-prescription medicine use in Denmark: association with socio-economic position. *Eur J Clin Pharmacol* 2003;**59**(8-9):677-684.
10. Lu CY, Barratt J, Vitry A, et al. Charlson and Rx-Risk comorbidity indices were predictive of mortality in the Australian health care setting. *J Clin Epidemiol* 2011;**64**(2):223-228.
11. Rosholm JU, Christensen K. Relationship between drug use and self-reported health in elderly Danes. *Eur J Clin Pharmacol* 1997;**53**(3-4):179-183.

12. Hershman DL, Simonoff PA, Frishman WH, et al. Drug utilization in the old old and how it relates to self-perceived health and all-cause mortality: results from the Bronx Aging Study. *J Am Geriatr Soc* 1995;**43**(4):356-360.
13. Wamala S, Merlo J, Bostrom G, et al. Socioeconomic disadvantage and primary non-adherence with medication in Sweden. *Int J Qual Health Care* 2007;**19**(3):134-140.
14. Wamala S, Merlo J, Bostrom G, et al. Perceived discrimination, socioeconomic disadvantage and refraining from seeking medical treatment in Sweden. *J Epidemiol Community Health* 2007;**61**(5):409-415.
15. Furu K, Straume B, Thelle DS. Legal drug use in a general population: association with gender, morbidity, health care utilization, and lifestyle characteristics. *J Clin Epidemiol* 1997;**50**(3):341-349.
16. Adler NE, Stewart J. Health disparities across the lifespan: meaning, methods, and mechanisms. *Ann N Y Acad Sci* 2010;**1186**:5-23.
17. Lichtenstein P, Harris JR, Pedersen NL, et al. Socioeconomic status and physical health, how are they related? An empirical study based on twins reared apart and twins reared together. *Soc Sci Med* 1993;**36**(4):441-450.
18. Smith GD, Blane D, Bartley M. Explanations for socio-economic differentials in mortality. Evidence from Britain and elsewhere. *European Journal of Public Health* 1994;**4**(4):131-144.
19. Madsen M, Andersen AM, Christensen K, et al. Does educational status impact adult mortality in Denmark? A twin approach. *Am J Epidemiol* 2010;**172**(2):225-234.
20. Behrman JR, Kohler HP, Jensen VM, et al. Does more schooling reduce hospitalization and delay mortality? New evidence based on Danish twins. *Demography* 2011;**48**(4):1347-1375.
21. Madsen M, Andersen PK, Gerster M, et al. Does the association of education with breast cancer replicate within twin pairs? A register-based study on Danish female twins. *Br J Cancer* 2011;**104**(3):520-523.
22. Osler M, McGue M, Christensen K. Socioeconomic position and twins' health: a life-course analysis of 1266 pairs of middle-aged Danish twins. *Int J Epidemiol* 2007;**36**(1):77-83.



- 1  
2  
3  
4 23. Fujiwara T, Kawachi I. Is education causally related to better health? A twin fixed-effect study in the USA. *Int*  
5 *J Epidemiol* 2009;**38**(5):1310-1322.  
6  
7  
8  
9 24. Institute For Statistics. ISCED 1997 International Standard Classification of Education. UNESCO; 2006.  
10  
11  
12 25. Organisation for Economic Co-operation and Development. The OECD list of social indicators. Organisation  
13 for Economic Co-operation and Development; 1982.  
14  
15  
16 26. Guidelines for ATC classification and DDD assignment. 13th edition. Oslo: WHO Collaboration Centre for  
17 Drug Statistics Methodology; 2010.  
18  
19  
20 27. Skytthe A, Kyvik K, Holm NV, et al. The Danish Twin Registry: 127 birth cohorts of twins. *Twin Res*  
21 *2002*;**5**(5):352-357.  
22  
23  
24  
25 28. Christiansen L, Frederiksen H, Schousboe K, et al. Age- and sex-differences in the validity of questionnaire-  
26 based zygosity in twins. *Twin Res* 2003;**6**(4):275-278.  
27  
28  
29  
30 29. Cook RJ, Lawless JF. *Methods based on Counts and Rate Functions. The Statistical Analysis of Recurrent*  
31 *Events*. New York: Springer; 2007.  
32  
33  
34  
35 30. Lin DY. Linear regression analysis of censored medical costs. *Biostatistics* 2000;**1**(1):35-47.  
36  
37  
38 31. Frisell T, Oberg S, Kuja-Halkola R, et al. Sibling comparison designs: bias from non-shared confounders and  
39 measurement error. *Epidemiology* 2012;**23**(5):713-720.  
40  
41  
42 32. Horwitz AV, Videon TM, Schmitz MF, et al. Rethinking twins and environments: possible social sources for  
43 assumed genetic influences in twin research. *J Health Soc Behav* 2003;**44**(2):111-129.  
44  
45  
46 33. Kaufman JS, Glymour MM. Splitting the differences: problems in using twin controls to study the effects of  
47 BMI on mortality. *Epidemiology* 2011;**22**(1):104-106.  
48  
49  
50  
51 34. Frisell T, Pawitan Y, Langstrom N. Is the association between general cognitive ability and violent crime  
52 caused by family-level confounders? *PLoS One* 2012;**7**(7):e41783.  
53  
54  
55  
56  
57  
58  
59  
60

- 1  
2  
3  
4 35. Carlsson S, Andersson T, de FU, et al. Body mass index and mortality: is the association explained by genetic  
5 factors? *Epidemiology* 2011;**22**(1):98-103.  
6  
7  
8  
9 36. Nielsen MW, Gundgaard J, Hansen EH, et al. Use of six main drug therapeutic groups across educational  
10 groups: self-reported survey and prescription records. *J Clin Pharm Ther* 2005;**30**(3):259-269.  
11  
12  
13 37. van Doorslaer E, Masseria C, Koolman X. Inequalities in access to medical care by income in developed  
14 countries. *CMAJ* 2006;**174**(2):177-183.  
15  
16  
17  
18 38. Christensen K, Wienke A, Skytthe A, et al. Cardiovascular mortality in twins and the fetal origins hypothesis.  
19 *Twin Res* 2001;**4**(5):344-349.  
20  
21  
22 39. Christensen K, Vaupel JW, Holm NV, et al. Mortality among twins after age 6: fetal origins hypothesis versus  
23 twin method. *BMJ* 1995;**310**(6977):432-436.  
24  
25  
26  
27 40. Osler M, Madsen M, Nybo Andersen AM, et al. Do childhood and adult socioeconomic circumstances  
28 influence health and physical function in middle-age? *Soc Sci Med* 2009;**68**(8):1425-1431.  
29  
30  
31  
32 41. Krieger N, Chen JT, Coull BA, et al. Lifetime socioeconomic position and twins' health: an analysis of 308  
33 pairs of United States women twins. *PLoS Med* 2005;**2**(7):e162.  
34  
35  
36  
37  
38  
39  
40  
41  
42  
43  
44  
45  
46  
47  
48  
49  
50  
51  
52  
53  
54  
55  
56  
57  
58  
59  
60

STROBE Statement—Checklist of items that should be included in reports of *cohort studies*

|                              | Item No | Recommendation                                                                                                                                                                                                                                                                                                                                                                                                |
|------------------------------|---------|---------------------------------------------------------------------------------------------------------------------------------------------------------------------------------------------------------------------------------------------------------------------------------------------------------------------------------------------------------------------------------------------------------------|
| <b>Title and abstract</b>    | 1       | (a) Indicate the study's design with a commonly used term in the title or the abstract<br>(b) Provide in the abstract an informative and balanced summary of what was done and what was found                                                                                                                                                                                                                 |
| <b>Introduction</b>          |         |                                                                                                                                                                                                                                                                                                                                                                                                               |
| Background/rationale         | 2       | Explain the scientific background and rationale for the investigation being reported                                                                                                                                                                                                                                                                                                                          |
| Objectives                   | 3       | State specific objectives, including any prespecified hypotheses                                                                                                                                                                                                                                                                                                                                              |
| <b>Methods</b>               |         |                                                                                                                                                                                                                                                                                                                                                                                                               |
| Study design                 | 4       | Present key elements of study design early in the paper                                                                                                                                                                                                                                                                                                                                                       |
| Setting                      | 5       | Describe the setting, locations, and relevant dates, including periods of recruitment, exposure, follow-up, and data collection                                                                                                                                                                                                                                                                               |
| Participants                 | 6       | (a) Give the eligibility criteria, and the sources and methods of selection of participants. Describe methods of follow-up<br>(b) For matched studies, give matching criteria and number of exposed and unexposed                                                                                                                                                                                             |
| Variables                    | 7       | Clearly define all outcomes, exposures, predictors, potential confounders, and effect modifiers. Give diagnostic criteria, if applicable                                                                                                                                                                                                                                                                      |
| Data sources/<br>measurement | 8*      | For each variable of interest, give sources of data and details of methods of assessment (measurement). Describe comparability of assessment methods if there is more than one group                                                                                                                                                                                                                          |
| Bias                         | 9       | Describe any efforts to address potential sources of bias                                                                                                                                                                                                                                                                                                                                                     |
| Study size                   | 10      | Explain how the study size was arrived at                                                                                                                                                                                                                                                                                                                                                                     |
| Quantitative variables       | 11      | Explain how quantitative variables were handled in the analyses. If applicable, describe which groupings were chosen and why                                                                                                                                                                                                                                                                                  |
| Statistical methods          | 12      | (a) Describe all statistical methods, including those used to control for confounding<br>(b) Describe any methods used to examine subgroups and interactions<br>(c) Explain how missing data were addressed<br>(d) If applicable, explain how loss to follow-up was addressed<br>(e) Describe any sensitivity analyses                                                                                        |
| <b>Results</b>               |         |                                                                                                                                                                                                                                                                                                                                                                                                               |
| Participants                 | 13*     | (a) Report numbers of individuals at each stage of study—eg numbers potentially eligible, examined for eligibility, confirmed eligible, included in the study, completing follow-up, and analysed<br>(b) Give reasons for non-participation at each stage<br>(c) Consider use of a flow diagram                                                                                                               |
| Descriptive data             | 14*     | (a) Give characteristics of study participants (eg demographic, clinical, social) and information on exposures and potential confounders<br>(b) Indicate number of participants with missing data for each variable of interest<br>(c) Summarise follow-up time (eg, average and total amount)                                                                                                                |
| Outcome data                 | 15*     | Report numbers of outcome events or summary measures over time                                                                                                                                                                                                                                                                                                                                                |
| Main results                 | 16      | (a) Give unadjusted estimates and, if applicable, confounder-adjusted estimates and their precision (eg, 95% confidence interval). Make clear which confounders were adjusted for and why they were included<br>(b) Report category boundaries when continuous variables were categorized<br>(c) If relevant, consider translating estimates of relative risk into absolute risk for a meaningful time period |

|    |                          |    |                                                                                        |
|----|--------------------------|----|----------------------------------------------------------------------------------------|
| 1  | Other analyses           | 17 | Report other analyses done—eg analyses of subgroups and interactions, and              |
| 2  |                          |    | sensitivity analyses                                                                   |
| 3  | <b>Discussion</b>        |    |                                                                                        |
| 4  | Key results              | 18 | Summarise key results with reference to study objectives                               |
| 5  | Limitations              | 19 | Discuss limitations of the study, taking into account sources of potential bias or     |
| 6  |                          |    | imprecision. Discuss both direction and magnitude of any potential bias                |
| 7  | Interpretation           | 20 | Give a cautious overall interpretation of results considering objectives, limitations, |
| 8  |                          |    | multiplicity of analyses, results from similar studies, and other relevant evidence    |
| 9  | Generalisability         | 21 | Discuss the generalisability (external validity) of the study results                  |
| 10 | <b>Other information</b> |    |                                                                                        |
| 11 | Funding                  | 22 | Give the source of funding and the role of the funders for the present study and, if   |
| 12 |                          |    | applicable, for the original study on which the present article is based               |
| 13 |                          |    |                                                                                        |
| 14 |                          |    |                                                                                        |
| 15 |                          |    |                                                                                        |
| 16 |                          |    |                                                                                        |

17 \*Give information separately for exposed and unexposed groups.

18  
19  
20 **Note:** An Explanation and Elaboration article discusses each checklist item and gives methodological background and  
21 published examples of transparent reporting. The STROBE checklist is best used in conjunction with this article (freely  
22 available on the Web sites of PLoS Medicine at <http://www.plosmedicine.org/>, Annals of Internal Medicine at  
23 <http://www.annals.org/>, and Epidemiology at <http://www.epidem.com/>). Information on the STROBE Initiative is  
24 available at <http://www.strobe-statement.org>.  
25  
26  
27  
28  
29  
30  
31  
32  
33  
34  
35  
36  
37  
38  
39  
40  
41  
42  
43  
44  
45  
46  
47  
48  
49  
50  
51  
52  
53  
54  
55  
56  
57  
58  
59  
60



**Are familial factors underlying the association between socio-economic position and prescription medicine? A register-based study on Danish twins**

|                                 |                                                                                                                                                                                                                                                                                                                                                                                                                                                                                                                    |
|---------------------------------|--------------------------------------------------------------------------------------------------------------------------------------------------------------------------------------------------------------------------------------------------------------------------------------------------------------------------------------------------------------------------------------------------------------------------------------------------------------------------------------------------------------------|
| Journal:                        | <i>BMJ Open</i>                                                                                                                                                                                                                                                                                                                                                                                                                                                                                                    |
| Manuscript ID:                  | bmjopen-2013-003292.R1                                                                                                                                                                                                                                                                                                                                                                                                                                                                                             |
| Article Type:                   | Research                                                                                                                                                                                                                                                                                                                                                                                                                                                                                                           |
| Date Submitted by the Author:   | 01-Sep-2013                                                                                                                                                                                                                                                                                                                                                                                                                                                                                                        |
| Complete List of Authors:       | Madsen, Mia; University of Southern Denmark, Unit of Epidemiology; Danish Aging Research Center, Andersen, Per; University of Copenhagen, Section of Biostatistics Gerster, Mette; University of Southern Denmark, Unit of Biostatistics Andersen, Anne-Marie; University of Copenhagen, Section of Social Medicine Osler, Merete; Research Center for Prevention and Health, Glostrup University Hospital; Danish Aging Research Center, Christensen, Kaare; University of Southern Denmark, Unit of Epidemiology |
| <b>Primary Subject Heading</b>: | Epidemiology                                                                                                                                                                                                                                                                                                                                                                                                                                                                                                       |
| Secondary Subject Heading:      | Epidemiology, Genetics and genomics, Pharmacology and therapeutics, Research methods, Health services research                                                                                                                                                                                                                                                                                                                                                                                                     |
| Keywords:                       | EPIDEMIOLOGY, GENETICS, SOCIAL MEDICINE                                                                                                                                                                                                                                                                                                                                                                                                                                                                            |
|                                 |                                                                                                                                                                                                                                                                                                                                                                                                                                                                                                                    |

SCHOLARONE™  
Manuscripts

only

1  
2  
3  
4 **Are familial factors underlying the association between socio-economic position**  
5 **and prescription medicine? A register-based study on Danish twins**  
6

7  
8 Madsen, Mia<sup>1,2</sup>; Andersen, Per Kragh<sup>3</sup>; Gerster, Mette<sup>4</sup>; Andersen, Anne-Marie Nybo<sup>5</sup>; Osler,  
9 Merete<sup>2,6</sup>; Christensen, Kaare<sup>1</sup>

10  
11 <sup>1</sup>University of Southern Denmark – Unite of Epidemiology

12 <sup>2</sup>Danish Aging Research Center

13 <sup>3</sup>University of Copenhagen – Section of Biostatistics

14 <sup>4</sup>University of Southern Denmark – Unit of Biostatistics

15 <sup>5</sup>University of Copenhagen – Section of Social Medicine

16 <sup>6</sup>Research Center for Prevention and Health – Glostrup University Hospital  
17  
18  
19

20 Corresponding author:

21 **Dr. Mia Madsen**

22 Unit of Epidemiology

23 University of Southern Denmark

24 Odense C 5000

25 Denmark

26 Phone: +65503610

27 Email: mimadsen@health.sdu.dk  
28  
29  
30  
31  
32  
33  
34  
35  
36  
37  
38  
39  
40  
41  
42  
43  
44  
45  
46  
47  
48  
49  
50  
51  
52  
53  
54  
55  
56  
57  
58  
59  
60

## ABSTRACT

**Objectives:** Although well-established, the association between socio-economic position and health and health behavior is not clearly understood, and it has been speculated that familial factors, e.g. dispositional factors or exposures in the rearing environment, may be underlying the association. The objective was to compare prescription fillings within twin pairs who are partly or fully genetically identical and share childhood exposures.

**Design:** Twin cohort study.

**Setting:** Denmark.

**Participants:** Data from the Danish Twin Registry was linked to registers in Statistics Denmark and the Danish Registry of Medicinal Product statistics. A total of 8582 monozygotic (MZ) and 15,788 dizygotic same sexed (DZSS) twins were included.

**Outcome measures:** Number of prescription fillings during follow-up (1995-2005) was analyzed according to education and income. Results of unpaired and intra-pair analyses were compared.

**Results:** An inverse social gradient in filling of prescriptions for all-purpose and system-specific drugs was observed in the unpaired analyses. In the intra-pair analyses, associations were attenuated some in DZSS and more in MZ twins. Filling of drugs targeting the nervous system was still strongly associated with income in the intra-pair analyses.

**Conclusions:** Familial factors seem to account for part of the observed social inequality in filling of prescription medicine.

## ARTICLE SUMMARY

### Article focus

- To investigate if the association between socio-economic factors and filling of drug prescriptions persists after controlling for genetic and childhood factors shared within twins.

### Key messages

- The inverse association between socio-economic factors and filling of prescription medicine show substantial attenuation in intra-pair analyses of twins, except for drugs targeting the nervous system.
- Greater attenuation within monozygotic than dizygotic same sex twins.
- Shared familial factors seem to account for at least part of the observed social inequality in fillings of prescription medicine.

**Strengths and limitations**

- This study is based on nation-wide register data covering more than a decade, and we present results from a largely unselected population of more than 8000 monozygotic and 15,000 dizygotic same sexed twins.
- This is the first twin study on health inequalities to report such clear-cut findings with sufficient power for meaningful interpretation of intra-pair analyses and for comparison of zygosity-specific results.
- Prescription fillings are not a perfect measure of health status, but we still argue that it is an inventive and fairly valid indicator in a Danish setting where prescription medicine has to be prescribed by a medical doctor and accounts for 96% of the total drug sale.
- The twin study is clearly a powerful approach, but when interpreting findings, alternative explanations for the pattern of attenuation should be considered, including measurement error and unshared confounding. However, in this case we find it unlikely that these potential sources of bias could fully explain our findings.



## INTRODUCTION

Social inequalities in health and health behaviour have been widely demonstrated in many societies, including the Scandinavian countries[1]. Often social disparities in health are not confined to the most marginalized groups of society but are expressed as a gradient over the entire spectrum of social stratification[2]. The inverse relationship between socio-economic position (SEP) and health has consistently been observed across different social indicators and for numerous types of health outcomes[3, 4]. Use of prescription medicine is one health-related outcome that has been found to be socially patterned, where Danish data have shown a greater use among people with low SEP compared to people with high SEP[5, 6]. Denmark has a tax financed decentralized health care system with a partly need-dependent reimbursement system for outpatient prescription drugs. All prescription-drugs have to be prescribed by a medical doctor and, compared to a number of other countries, prescription medicine constitute the majority of the total drug sale in Denmark (app. 90%)[7]. Many studies have shown substantially reduced social differences in drug use when health status have been taken into account[6, 8, 9], which may indicate that filling of prescription medicine to a large extent reflects health status. This is supported by the fact that comorbidity indices, based on prescription drug dispensings, have been established as strong predictors of mortality[10], and that drug use has proven to be a valid indicator of self-rated health[11, 12]. However, other factors such as health care seeking behaviour and access to health care[13, 14] may also influence drug use, but the social gradient in these factors would, theoretically, be expected to be opposite that of health status, i.e. greater drug use among people with high SEP compared to low SEP. Such a positive association is generally not supported by the existing Danish literature[5, 6, 15].

Although well-established, the inverse association between SEP and health and health behaviour is not clearly understood, but many factors during the life course may play a role in the production of these social health differences. Suggested pathways include: Material deprivation, behavioural factors, and psychological factors[16]. It has also been suggested that it is not SEP in adulthood per se that influences health, but underlying familial factors already at play in early life [17, 18], e.g. rearing environment or genetic make-up are associated both with the obtainment of adult SEP and health status later in life .

In a recent commentary, Gilman & Loucks (2012) discuss why childhood environment may be such an important underlying factor in the production of social health differences. They argue that because childhood encompasses developmentally sensitive periods for the acquisition of cognitive-, psychologic-, and social skills that have a

1  
2  
3  
4 profound impact on an individual's capacity for long term health and provide opportunities (and constraints) for  
5  
6 adult socioeconomic conditions, it can potentially influence the association between any adult risk factor and  
7  
8 later life health[19].The potential role of genetic setup in explaining health inequalities is reviewed by  
9  
10 Mackenbach (2005), who suggests that the most plausible set of hypotheses relates to genetic influences of  
11  
12 personal attributes such as cognitive ability, personality, and bodily and mental fitness that may influence both  
13  
14 SEP and adult health status[20].  
15

16  
17 With the discordant twin pair design, it is possible to investigate the effect of adult SEP on prescription fillings  
18  
19 eliminating confounding from factors shared by a pair of twins, exploiting that twins are partly or fully  
20  
21 genetically identical and have experienced a similar childhood environment due to their common upbringing.  
22  
23 This approach has been applied in a number of previous twin studies investigating different health outcomes,  
24  
25 including mortality[21], hospitalizations[22], breast cancer[23], and also softer endpoints such as depression  
26  
27 scores and self-rated health[24, 25]. However, the majority of these studies suffer from power limitations either  
28  
29 due to small sample sizes and/or rare outcomes making interpretations difficult.

30  
31 In this study we aimed to investigate if there was an effect of SEP in adulthood on the number of prescription  
32  
33 fillings above and beyond the effect of shared familial factors. Filling of prescription medicine is a quantitative  
34  
35 health measure rendering sufficient power for the intra-pair comparisons. Differences in genetic relatedness  
36  
37 between monozygotic (MZ) (genetically identical) and dizygotic (DZ) twins (share on average 50% of  
38  
39 segregating genes) may further give an indication of the possible types of confounding (i.e. genetic or  
40  
41 environmental factors). In a theoretical situation of no measurement error and no confounding from unshared  
42  
43 factors, genetic confounding would be indicated if an observed social gradient in prescription medicine was  
44  
45 partly attenuated in DZ twins and fully attenuated in MZ twins, when shared familial factors had been taken into  
46  
47 account. Likewise, an attenuation of similar size in DZ and MZ twins would be compatible with shared  
48  
49 environmental confounding. Finally, to support a SEP-effect on prescription fillings not due to confounding from  
50  
51 shared familial factors, the association would have to persist in both DZ and MZ twins.

52  
53 To support the utility of prescription medicine as a health indicator we also analysed its association with  
54  
55 mortality.  
56  
57  
58  
59  
60

## METHODS

### Study population

Data from the Danish Twin Registry was linked with information in the Danish Registry of Medicinal Products and administrative registers in Statistics Denmark. The study population consisted of 24 370 twins, including 8582 monozygotic and 15 788 dizygotic same sex twins (DZSS), who were born during 1921-1965 and alive and resident in Denmark at the beginning of follow-up (January 1 1995), after exclusions due to triplets (n=384) unknown zygosity (UZ) (n=3731), and dizygotic opposite sex pairs (DZOS) (n=16 710), missing data on education or income (n=845), and non-intact twin pairs in which one twin was dead, emigrated, or had missing information (n=2847). To evaluate the representativeness of the results from the unpaired twin analyses, we also analysed a 5% population-based sample of the Danish population (n=137 300).

### Social indicators

We used information on highest attained education in 1995 at age 30+ of the study population, categorized according to the International Standard Classification of Education of 1997[26] into: primary/lower secondary education (basic compulsory education), upper secondary education (secondary), and tertiary education (Bachelor's degree and above). Income was measured as an average of the equivalised gross household income (Danish currency) in 1994-1995, grouped into quartiles within each birth cohort. "Equivalised" income is adjusted to take into account that households can share resources. Inspired by the standard OECD equivalence scale[27], the household-denominator was constructed according to an equivalence scale that assigned a value of 1 to the first household member, of 0.7 to the second household member and of 0.5 to each additional household member. Calculating quartiles by birth cohort is aiming at taking into account that income is not fully comparable at different ages during the life course. An implication of this is that the income measure reflects a relative rather than absolute income level.

### Prescription medicine

The Danish Registry of Medicinal Products was established in 1995 and contains information on the total sale of prescription medicine in Denmark registered by the pharmacies via a computerized accounting system. The drug information is recorded according to the Anatomical Therapeutic Chemical classification system (ATC)[28] where the active substances in drugs are divided into different groups, primarily according to the organ system

1  
2  
3  
4 on which they act. Other information includes date of dispensing and *daily defined doses* (DDD), defined as the  
5 assumed average maintenance dose per day for a drug used for its main indication in adults[28]. Outcomes of  
6 interest were defined as the number of prescription fillings during follow-up for all-purpose medication (ACT-  
7 groups: A,B,C,D,G,H,I,L,M,N,P,Q,R,S,V, excluding Q which is for veterinary use, and G02B and G03A, which are for  
8 contraceptive use) and four groups of system-specific medication: ATC-C (heart/circulatory system), ATC-N  
9 (nervous system), ATC-R (respiratory system) and ATC-A (alimentary tract/metabolism). If no ATC-code was  
10 assigned a prescription, it was excluded (1%). DDD was used as a supplementary outcome measure.  
11  
12  
13  
14  
15  
16  
17  
18

### 19 **Other covariates**

20 Sex and age were included in the analyses. Analyses were performed separately for MZ and DZSS twins. Zygosity  
21 had previously been determined by questionnaire[29], a method that has proven valid with an overall  
22 misclassification frequency of less than 5% validated against a classification based on genetic markers [30].  
23  
24  
25  
26  
27

### 28 **Data analysis**

29 Analyses were carried out using Cox regression for recurrent events (proportional means regression), thereby  
30 accommodating multiple events (prescription fillings) per individual[31]. Age was used as underlying time-  
31 variable and subjects were followed from age at baseline to the age at end of follow-up (Dec 31 2005) or death or  
32 emigration, and the timing of each prescription filling during this period was recorded. Both unpaired and intra-  
33 pair analyses were performed. In the unpaired analyses robust standard errors were used to account for the  
34 interdependence of observations within pairs and within each individual. Results of the unpaired analyses were  
35 compared to the intra-pair analyses, which were performed using a stratified Cox model:  $EN_{ij}(t) = \mu_{0j}(t)e^{\beta'z_{ij}}$ . Here  
36  $EN_{ij}(t)$  denotes the mean number of prescription fillings at time  $t$  for an individual  $i$  belonging to twin pair  $j$ ,  $\mu_{0j}(t)$   
37 is the pair-specific baseline mean, and  $e^{\beta}$  is the effect of the covariates adjusted for shared familial factors. Thus,  
38 in this analysis the mean number of prescription fillings were compared within twin pairs, thereby controlling  
39 for familial factors shared within a pair of twins. In the stratified model only SEP-discordant twin pairs  
40 contribute information to the beta-parameter for SEP, although concordant pairs may contribute information to  
41 other beta-parameters.  
42  
43  
44  
45  
46  
47  
48  
49  
50  
51  
52  
53

54 As counting process models do not allow simultaneous events, only one prescription of interest per day was  
55 included in the analysis.  
56  
57  
58  
59  
60

Analyses were performed separately for zygosity and sex, and potential interactions between the social indicators and zygosity, sex, and age, respectively, were evaluated by including interaction terms in the models and using Wald test-statistics. To analyse the association between prescriptions and mortality, we used a Cox regression model, continuously updating the number of prescription fillings over time. Descriptive intra-pair correlations were calculated as polychoric correlation coefficients.

### Subanalyses

Since DDD may reflect the actual drug use more precisely than number of prescription fillings, mean DDD were also analysed by means of a fixed-effects linear regression model taking censoring into account[32]. This was treated as a subanalysis due to the highly right-skewed distribution of DDD, making linear regression a less optimal choice of model.

Permission for linkage and use of data for this study was obtained from the Danish Data Protection Board (2000-54-0047).

**RESULTS**

According to table 1, showing the distribution of education and income in the population, men were better educated than women. Generally, the education of the twin population was comparable to that of the population-based sample. Only UZ twins had a markedly lower educational status and a higher proportion of missing information. The table also shows the mean income within each quartile. Twins have a somewhat higher mean income compared to the population-based sample.

For peer review only

**Table 1: Descriptives on Educational Status and Income in a 5% Population Based Sample (n=144749) and a Population of Danish Twins (n=48887), Including Intact and Non-intact Twin Pairs, Stratified on Sex and Zygosity.**

|                                       | 5% population sample |                |        |        | All twins (n=48887) |                |        |        | DZSS (n=18426) |                | MZ (n=9636) |                | DZOS (n=16710) |                | UZ (n=3731) |                |
|---------------------------------------|----------------------|----------------|--------|--------|---------------------|----------------|--------|--------|----------------|----------------|-------------|----------------|----------------|----------------|-------------|----------------|
|                                       | N                    | % <sup>a</sup> | Mean   | SD     | n                   | % <sup>a</sup> | Mean   | SD     | N              | % <sup>a</sup> | N           | % <sup>a</sup> | n              | % <sup>a</sup> | n           | % <sup>a</sup> |
| <b>Sex</b>                            |                      |                |        |        |                     |                |        |        |                |                |             |                |                |                |             |                |
| <b>Educational status<sup>b</sup></b> |                      |                |        |        |                     |                |        |        |                |                |             |                |                |                |             |                |
| <i>Men</i>                            |                      |                |        |        |                     |                |        |        |                |                |             |                |                |                |             |                |
| Primary                               | 23550                | 32             |        |        | 8909                | 35             |        |        | 3553           | 36             | 1517        | 31             | 2882           | 34             | 957         | 43             |
| Secondary                             | 31336                | 43             |        |        | 11237               | 44             |        |        | 4309           | 44             | 2292        | 47             | 3834           | 45             | 802         | 36             |
| Tertiary                              | 13722                | 19             |        |        | 4515                | 18             |        |        | 1685           | 17             | 963         | 20             | 1530           | 18             | 337         | 15             |
| Missing                               | 4072                 | 6              |        |        | 800                 | 3              |        |        | 310            | 3              | 128         | 3              | 208            | 2              | 154         | 7              |
| Total                                 | 72680                | 100            |        |        | 25461               | 100            |        |        | 9857           | 100            | 4900        | 101            | 8454           | 99             | 2250        | 101            |
| <i>Women</i>                          |                      |                |        |        |                     |                |        |        |                |                |             |                |                |                |             |                |
| Primary                               | 31215                | 43             |        |        | 10182               | 44             |        |        | 3857           | 45             | 1903        | 40             | 3633           | 44             | 789         | 53             |
| Secondary                             | 23809                | 33             |        |        | 7805                | 34             |        |        | 2868           | 34             | 1730        | 37             | 2807           | 34             | 400         | 27             |
| Tertiary                              | 14229                | 20             |        |        | 4613                | 20             |        |        | 1696           | 20             | 1004        | 21             | 1705           | 21             | 208         | 14             |
| Missing                               | 2816                 | 4              |        |        | 442                 | 2              |        |        | 148            | 2              | 99          | 2              | 111            | 1              | 84          | 6              |
| Total                                 | 72069                | 100            |        |        | 23042               | 100            |        |        | 8569           | 101            | 4736        | 100            | 8256           | 100            | 1481        | 100            |
| <b>Income (DKK)</b>                   |                      |                |        |        |                     |                |        |        |                |                |             |                |                |                |             |                |
| <i>Men</i>                            |                      |                |        |        |                     |                |        |        |                |                |             |                |                |                |             |                |
| 1st quartile                          | 17348                | 24             | 88537  | 28373  | 5931                | 24             | 92330  | 27563  | 2251           | 23             | 1061        | 22             | 1929           | 23             | 690         | 31             |
| 2nd quartile                          | 17510                | 24             | 145676 | 25887  | 6523                | 24             | 149367 | 24179  | 2563           | 26             | 1208        | 25             | 2201           | 26             | 551         | 24             |
| 3rd quartile                          | 17976                | 25             | 191360 | 34863  | 6769                | 25             | 196738 | 31365  | 2612           | 27             | 1375        | 28             | 2246           | 27             | 536         | 24             |
| 4th quartile                          | 18228                | 25             | 311232 | 141784 | 5960                | 25             | 314180 | 225459 | 2340           | 24             | 1218        | 25             | 2006           | 24             | 396         | 18             |
| Missing                               | 1618                 | 2              |        |        | 278                 | 2              |        |        | 91             | 1              | 38          | 1              | 72             | 1              | 77          | 3              |
| Total                                 | 72680                | 100            |        |        | 25461               | 100            |        |        | 9875           | 101            | 4900        | 101            | 8454           | 101            | 2250        | 100            |
| <i>Women</i>                          |                      |                |        |        |                     |                |        |        |                |                |             |                |                |                |             |                |
| 1st quartile                          | 18958                | 26             | 88201  | 26316  | 6070                | 26             | 91205  | 25698  | 2316           | 27             | 1222        | 26             | 2186           | 27             | 353         | 24             |
| 2nd quartile                          | 18219                | 25             | 142746 | 27689  | 6077                | 25             | 146427 | 25562  | 2152           | 25             | 1224        | 26             | 2106           | 26             | 313         | 21             |
| 3rd quartile                          | 17753                | 25             | 18942  | 36067  | 5795                | 25             | 194968 | 33291  | 1882           | 22             | 1097        | 23             | 1730           | 21             | 232         | 16             |
| 4th quartile                          | 16126                | 22             | 308876 | 225888 | 4941                | 22             | 312063 | 173113 | 45             | 1              | 35          | 1              | 34             | 0              | 45          | 3              |
| Missing                               | 1013                 | 1              |        |        | 159                 | 1              |        |        | 8569           | 100            | 4736        | 100            | 8256           | 101            | 1481        | 100            |
| Total                                 | 72069                | 99             |        |        | 23042               | 99             |        |        | 2251           | 23             | 1061        | 22             | 1929           | 23             | 690         | 31             |

DZSS=Dizygotic same sex twins; MZ=Monozygotic twins; DZOS=Dizygotic opposite sex twins; UZ=Unknown zygosity, <sup>a</sup>May not sum to 100 because of rounding, <sup>b</sup>International Standard Classification of Education, <sup>c</sup>Average of equalized gross household income in 1994-1995 in quartiles. DKK=Danish Crowns.

The proportion of education-discordant twin pairs was 30% for MZ twins and 42% for DZSS twins, while 61% MZ twins and 68% DZSS twins were discordant on income (table 2).

**Table 2: Descriptives on Intra-Pair Discordances on Educational Status and Income, Stratified on Zygosity in a Population of Danish Twins (n=24370).**

|                                                      | DZSS<br>(n=15788) |                | MZ<br>(n=8582) |                |
|------------------------------------------------------|-------------------|----------------|----------------|----------------|
|                                                      | N                 | % <sup>a</sup> | n              | % <sup>a</sup> |
| <b>Educational status</b>                            |                   |                |                |                |
| Primary vs Secondary                                 | 3590              | 23             | 1460           | 17             |
| Primary vs Tertiary                                  | 900               | 6              | 316            | 4              |
| Secondary vs Tertiary                                | 2194              | 14             | 820            | 10             |
| Any discordance                                      | 6684              | 42             | 2596           | 30             |
| <b>Income</b>                                        |                   |                |                |                |
| 1 <sup>st</sup> quartile vs 2 <sup>nd</sup> quartile | 2048              | 13             | 1072           | 12             |
| 1 <sup>st</sup> quartile vs 3 <sup>rd</sup> quartile | 1706              | 11             | 754            | 9              |
| 1 <sup>st</sup> quartile vs 4 <sup>th</sup> quartile | 1158              | 7              | 490            | 6              |
| 2 <sup>nd</sup> quartile vs 3 <sup>rd</sup> quartile | 2266              | 14             | 1194           | 14             |
| 2 <sup>nd</sup> quartile vs 4 <sup>th</sup> quartile | 1574              | 10             | 682            | 8              |
| 3 <sup>rd</sup> quartile vs 4 <sup>th</sup> quartile | 2000              | 13             | 1080           | 13             |
| Any discordance                                      | 10 752            | 68             | 5272           | 61             |

DZSS= Dizygotic same sexed twins; MZ= Monozygotic twins; <sup>a</sup>May not sum to 100 because of rounding.

In the twin population, 1.9% did not redeem any drug prescriptions during the total follow-up period and 25% redeemed less than one prescription/year, on average (results not shown). Overall, women filled more prescriptions than men for all age groups and the number of prescription fillings increased with age in both sexes (table 3).



**Table 3: The Mean Number of Prescription Fillings After 1 and 10 Years of Follow-up in a 5% Population Based Sample and a Population of Danish Twins, Stratified on Age and Sex.**

| Type of drugs                                    | Nelson Aalen Cumulative Hazard |          |                  |          |
|--------------------------------------------------|--------------------------------|----------|------------------|----------|
|                                                  | 5 % pop. (n= 137 300)          |          | Twins (n=24 370) |          |
| Age                                              | 1 year                         | 10 years | 1 year           | 10 years |
| Sex                                              |                                |          |                  |          |
| <b>All purpose</b>                               |                                |          |                  |          |
| <i>30-44 years</i>                               |                                |          |                  |          |
| Men                                              | 2.5                            | 28.7     | 2.2              | 25.9     |
| Women                                            | 4.1                            | 44.5     | 3.8              | 41.1     |
| <i>45-59 years</i>                               |                                |          |                  |          |
| Men                                              | 3.6                            | 47.4     | 3.3              | 43.1     |
| Women                                            | 6.0                            | 71.9     | 5.7              | 68.4     |
| <i>60+ years</i>                                 |                                |          |                  |          |
| Men                                              | 6.4                            | 87.5     | 5.8              | 82.2     |
| Women                                            | 8.3                            | 105.4    | 7.2              | 95.7     |
| <b>Circulatory system (ATC-C)</b>                |                                |          |                  |          |
| <i>30-44 years</i>                               |                                |          |                  |          |
| Men                                              | 0.1                            | 3.3      | 0.1              | 2.9      |
| Women                                            | 0.2                            | 4.2      | 0.2              | 3.6      |
| <i>45-59 years</i>                               |                                |          |                  |          |
| Men                                              | 0.7                            | 12.6     | 0.6              | 10.6     |
| Women                                            | 0.8                            | 13.8     | 0.7              | 13.0     |
| <i>60+ years</i>                                 |                                |          |                  |          |
| Men                                              | 1.9                            | 29.6     | 1.7              | 27.4     |
| Women                                            | 1.9                            | 30.0     | 1.6              | 26.7     |
| <b>Nervous system (ATC-N)</b>                    |                                |          |                  |          |
| <i>30-44 years</i>                               |                                |          |                  |          |
| Men                                              | 0.8                            | 9.8      | 0.7              | 8.6      |
| Women                                            | 1.1                            | 14.5     | 1.0              | 13.3     |
| <i>45-59 years</i>                               |                                |          |                  |          |
| Men                                              | 1.2                            | 14.6     | 1.2              | 13.9     |
| Women                                            | 2.1                            | 25.0     | 2.0              | 24.1     |
| <i>60+ years</i>                                 |                                |          |                  |          |
| Men                                              | 1.8                            | 24.4     | 1.6              | 22.2     |
| Women                                            | 3.1                            | 39.2     | 2.7              | 35.8     |
| <b>Respiratory system (ATC-R)</b>                |                                |          |                  |          |
| <i>30-44 years</i>                               |                                |          |                  |          |
| Men                                              | 0.3                            | 3.9      | 0.3              | 3.6      |
| Women                                            | 0.6                            | 6.5      | 0.5              | 5.7      |
| <i>45-59 years</i>                               |                                |          |                  |          |
| Men                                              | 0.5                            | 5.8      | 0.4              | 5.0      |
| Women                                            | 0.8                            | 9.8      | 0.7              | 9.1      |
| <i>60+ years</i>                                 |                                |          |                  |          |
| Men                                              | 1.1                            | 14.4     | 0.9              | 12.5     |
| Women                                            | 1.2                            | 14.8     | 1.0              | 12.8     |
| <b>Alimentary tract &amp; metabolism (ATC-A)</b> |                                |          |                  |          |
| <i>30-44 years</i>                               |                                |          |                  |          |
| Men                                              | 0.3                            | 3.5      | 0.2              | 3.1      |
| Women                                            | 0.4                            | 5.0      | 0.4              | 4.1      |
| <i>45-59 years</i>                               |                                |          |                  |          |
| Men                                              | 0.5                            | 7.6      | 0.5              | 6.6      |
| Women                                            | 0.7                            | 9.6      | 0.7              | 8.6      |
| <i>60+ years</i>                                 |                                |          |                  |          |
| Men                                              | 1.1                            | 15.4     | 1.1              | 15.0     |
| Women                                            | 1.3                            | 18.3     | 1.0              | 16.4     |

1  
2  
3  
4 ATC-N drug prescriptions were the most frequently redeemed in the youngest age group. The mean number of  
5  
6 prescription fillings in the twin population was similar to that in the population-based sample, although slightly  
7  
8 higher in the population-based sample.

9  
10 In order to get a better idea of the clinical outcomes underlying the observed prescription patterns, we have  
11  
12 included a more detailed description of the most incident types of drugs at the 3-and 4-digit ATC level  
13  
14 (Supplementary table 1). From the table it appears that the ATC-C category primarily comprises drugs indicated  
15  
16 for hypertension and ischaemic heart disease, while the ATC-N category mainly includes drugs indicated for a  
17  
18 wide range of different diagnoses, including chronic pain disorders, insomnia, anxiety, psychoses, depression  
19  
20 etc.[28] In the ATC-R category the main types of drugs are drugs for obstructive airway disease such as asthma  
21  
22 and Chronic Obstructive Lung Disorder (COPD)[28]. Finally, drugs for acid-related disorders and diabetes are the  
23  
24 main constituents of the ATC-A category. The results of an analysis of the association between SEP and  
25  
26 prescription fillings for all-purpose and system-specific drugs are presented in table 4.  
27  
28  
29  
30  
31  
32  
33  
34  
35  
36  
37  
38  
39  
40  
41  
42  
43  
44  
45  
46  
47  
48  
49  
50  
51  
52  
53  
54  
55  
56  
57  
58  
59  
60

1  
2  
3  
4  
5  
6  
7  
8  
9  
10  
11  
12  
13  
14  
15  
16  
17  
18  
19  
20  
21  
22  
23  
24  
25  
26  
27  
28  
29  
30  
31  
32  
33  
34  
35  
36  
37  
38  
39  
40  
41  
42  
43  
44  
45  
46  
47  
48  
49

**Error! Not a valid link.**

For peer review only

1  
2  
3  
4 For all-purpose drugs, MZ twins in the highest income quartile had a 30% lower mean number of prescription  
5 fillings than MZ twins in the lowest income quartile (MR=0.70 (CI 95%; 0.65,0.77)). Similarly, MZ twins with a  
6 tertiary education had 17% lower mean number of prescription fillings than twins with a primary education  
7 (MR=0.82 (CI 95%; 0.75,0.89)). The association was slightly less strong for ATC-C drugs while stronger  
8 associations could be observed for the other system-specific drugs, particularly for ATC-N. In the unpaired  
9 analyses, no large differences could be observed between MZ and DZSS twins and there was no strong evidence  
10 for an interaction between SEP and zygosity in the unpaired analysis (education:  $P=0.81$ , income:  $P=0.95$ ). In  
11 contrast, the effect of SEP was moderated by zygosity in the intra-pair analyses (education:  $P=0.02$ , income:  
12  $P=0.05$ ), suggesting a more attenuated effect of SEP in MZ twins than in DZSS twins: In MZ twins, generally no  
13 statistically significant effect of education could be observed, while income was still somewhat associated with  
14 all-purpose medication and quite strongly with ACT-N drugs. In DZSS twins, a minor or moderate attenuation  
15 could be observed, and all effect parameters were statistically significant, except for ATC-C drugs. In the  
16 population-based sample, the associations were similar to that in the overall twin population.  
17  
18 When using DDD (for all-purpose drugs) as outcome measure (table 5), results similar to the results based on  
19 number of prescription fillings were obtained, although the attenuation patterns in MZ twins were somewhat  
20 more clear in this analysis, showing no statistically significant associations with DDD of neither education nor  
21 income. In the analysis of number of prescriptions as a predictor of mortality we found a 60% increase in  
22 mortality rate during follow-up for a person who, on average, filled 1 prescription per month during the follow-  
23 up period compared to a person without any prescription fillings (HR=1.60 (95% CI: 1.25,2.05)).  
24  
25  
26  
27  
28  
29  
30  
31  
32  
33  
34  
35  
36  
37  
38  
39  
40  
41  
42  
43  
44  
45  
46  
47  
48  
49  
50  
51  
52  
53  
54  
55  
56  
57  
58  
59  
60

**Table 5: Results from a Linear Regression Model Showing Number of Daily Defined Doses (DDD) for All-Purpose Drugs According to Educational Status and Income in a Population of Danish Twins (n=24370) Stratified on Zygosity. Results from Unpaired and Intra-Pair Analyses are Shown.**

| Educational status<br>Income | Unpaired analysis <sup>a</sup> |           | Intra-pair analysis <sup>b</sup> |           |             |           |      |          |
|------------------------------|--------------------------------|-----------|----------------------------------|-----------|-------------|-----------|------|----------|
|                              | DZSS n=15788                   |           | MZ n=8582                        |           | DZSS        |           | MZ   |          |
|                              | DDD                            | CI 95%    | DDD                              | CI 95%    | DDD         | CI 95%    | DDD  | CI 95%   |
| Secondary                    | <b>-287</b>                    | -397;-177 | <b>-289</b>                      | -440;-138 | <b>-245</b> | -399;-90  | -143 | -346;59  |
| Tertiary                     | <b>-404</b>                    | -531;-277 | <b>-424</b>                      | -606;-243 | <b>-344</b> | -557;-131 | -152 | -440;136 |
| 2nd quartile                 | <b>-401</b>                    | -541;-260 | <b>-275</b>                      | -463;-88  | <b>-219</b> | -383;-54  | 18   | -177;214 |
| 3rd quartile                 | <b>-541</b>                    | -680;-402 | <b>-451</b>                      | -638;-263 | <b>-367</b> | -535;-198 | -83  | -287;121 |
| 4th quartile                 | <b>-505</b>                    | -648;-363 | <b>-437</b>                      | -630;-243 | <b>-327</b> | -512;-142 | 16   | -209;242 |

DZSS=Dizygotic same sex twins; MZ=Monozygotic twins; <sup>a</sup>Unpaired analysis treating twins as individuals while taking interdependence of observations within each individual and within twin pairs into account. The interpretation of e.g. the education estimate is difference in the mean number of DDDs of an individual with a secondary or tertiary education compared to a random individual with a primary education. The estimates are adjusted for age and sex. Income and education are mutually adjusted <sup>b</sup>Intra-pair analysis of twins by inclusion of a fixed-effect statement. The interpretation of e.g. the education estimate is the difference in the mean number of DDDs of a twin with a secondary or tertiary education compared to its co-twin with a primary education. Bold typography indicates statistical significance at 5% level.

## DISCUSSION

### Summary of findings

In this large Danish twin population we demonstrated an inverse social gradient in fillings of prescription medicine for all-purpose and system-specific drugs. That is, a greater use of prescription medicine among those with a low SEP thus suggesting a worse health status of this group. Furthermore, the number of prescription fillings was shown to be associated with a greater risk of mortality. In the intra-pair analyses, where shared familial factors were controlled per design, the association between SEP and prescription fillings attenuated to a wide extent within MZ twins and statistically significantly less in DZSS twins. For education, there was generally no association with prescription fillings in the intra-pair analyses of MZ twins, except for drugs targeting the nervous system, while there was still some association of income with all-purpose medication and most system-specific drugs. However, no effect of income was seen in the intra-pair analyses when DDD were used as outcome measure. In spite of some variations between system-specific drugs, the overall pattern was the same as for all-purpose drugs, except for ATC-N drugs and to a lesser degree ATC-A drugs, which still showed some effect of SEP in the intra-pair analyses.

### Interpretation

The fact that the association was attenuated in the intra-pair analyses suggests that underlying factors shared by a pair of twins account for some of the observed association between SEP and prescription fillings. However, there may be a number of alternative or complementary explanations for this finding: Firstly, part of it is likely caused by measurement error. Measurement error is random and therefore not shared by twins. In the intra-pair analysis, variance due to shared factors is removed, and a relatively larger proportion of exposure variance is thus due to measurement error. This will result in increasing attenuation of parameter estimates in the intra-pair analyses[33]. However, since data come from official registers it can be expected that education and income have limited measurement error. Secondly, the behaviour of one twin could be affected by the behaviour of the other twin, i.e. 'social interaction' either by 'imitation' or 'differentiation'. The implications of a potential imitation could be smaller within-pair differences, which could be misinterpreted as confounding from underlying familial factors. This may be of some concern in this study since fillings of prescription medicine is likely to have a behavioural component. Another implication of the discordant twin pair approach is that only twin pairs who are discordant on exposure contribute with statistical information to the estimation of SEP-

1  
2  
3  
4 effects in the intra-pair analysis. This could potentially induce bias in the comparison of the unpaired and intra-  
5 pair analysis, since the two analyses are based only partly overlapping populations. Since MZ twins are less likely  
6 to be discordant, the selection bias may be most severe in MZ twins[34]. We examined this concern by restricting  
7 the unpaired analysis only to include groups with exposure-discordant twins. Results were similar to those of the  
8 main analysis in both MZ and DZ twins. A further issue relates to the fact that twins who are discordant on  
9 exposure are special in the sense that they, in spite of overlapping genes and rearing environment, differ in their  
10 SEP. Thus, unshared factors may explain these differences. This implies that the intra-pair analysis may still be  
11 confounded by unshared confounding factors, and that this confounding may be enforced in the intra-pair  
12 analysis[33]. Generally, confounding from unshared factors is thought to be more severe when confounders are  
13 less correlated than exposure[33]. This may or may not be true in our case, since we can only hypothesize on the  
14 correlation of unmeasured confounders. Nevertheless, the correlation of education and income (MZ=0.79,  
15 DZ=0.58 and MZ=0.49, DZ=0.33) are more or less of the same magnitude as phenotypes like cognitive ability[35]  
16 and BMI[36] which have previously been investigated using similar designs. In any case, as shown by Frisell et al.  
17 (2012) in order for *increased* confounding to explain the *attenuation* of the association observed in this study,  
18 the potential non-shared confounders would have to create a positive association between education and  
19 prescription fillings. In most cases, however, we would expect a negative association, although filling of  
20 prescription medicine is indeed a complex health outcome and it is theoretically possible for a confounder to  
21 have a dual effect on prescription fillings by 1) increasing the capability of getting the relevant prescriptions, e.g.  
22 due to more regular health checks or better understanding of symptoms 2) at the same time reducing the need  
23 for prescription fillings due to better health status. Nevertheless, in a Danish context health status does seem to  
24 be the main determinant of prescription medicine[10, 37, 38] and was clearly associated with mortality in this  
25 data. Thus, in the presence of non-shared confounding we would expect the net effect of any confounding to  
26 produce a negative association between education and prescription fillings resulting in bias away from the  
27 null[33], and therefore it could not explain the observed attenuation of effect in the intra-pair analyses observed  
28 in this study.  
29  
30  
31  
32  
33  
34  
35  
36  
37  
38  
39  
40  
41  
42  
43  
44  
45  
46  
47  
48  
49  
50

51  
52  
53 The finding of greatest attenuation in MZ twins is compatible with the scenario of genetic confounding described  
54 in the introduction. Since the genetic overlap is greater in MZ twins than DZSS twins, one would expect a larger  
55 attenuation in MZ twins, if genetic factors gave rise to the confounding. However, a number of other factors could  
56  
57  
58  
59  
60

1  
2  
3  
4 produce a greater attenuation in MZ twins: First of all, the aforementioned measurement error may be most  
5 pronounced in MZ twins, due to the fact that increasing correlation in exposure will result in a greater  
6 attenuation of intra-pair parameter estimates[33]. In addition, the comparison of strength of association  
7 between MZ and DZ twins to indicate the source of familial confounding relies on the equal environment  
8 assumption: That is, MZ and DZ twins share their environment equally. However, this assumption may be  
9 challenged, and if it does not hold, i.e. if MZ twins not only share their genes but also their environment more  
10 closely than DZ twins[39], shared environmental factors could also produce a greater attenuation of effect in MZ  
11 twins. However, the interplay between environment and genes is complex, and it is conceivable that the  
12 environment to a certain extent is shaped in response to the genetic dispositions of an individual. If, for instance,  
13 a genetically determined similar appearance of MZ twins also elicits a more similar treatment from their peers,  
14 then these similar environmental stimuli can also be ascribed to genetic factors[40].  
15  
16  
17  
18  
19  
20  
21  
22  
23  
24  
25  
26

27 Thus, although several factors may contribute to the observed attenuation of association between SEP and filling  
28 of prescription drugs in the intra-pair analyses and to the differences in strength of association between MZ and  
29 DZ twins, the findings suggest that a part of the observed social inequality in prescription fillings is explained by  
30 either genetic or environmental factors shared by twins.  
31  
32  
33  
34  
35

36 The finding of a persistent association of particularly income with fillings of prescriptions for ATC-N drugs  
37 clearly stood out from the general results. We therefore carried out a post hoc subanalysis of specific categories  
38 of ATC-N drugs to test whether it were certain types of drugs driving the association. The analysis revealed that  
39 it was mainly for analgesics and psycholeptics that the association persisted, while the association was  
40 somewhat attenuated for psychoanaleptics (primarily antidepressants). This finding may support the notion of  
41 reverse causation, i.e. that health status influences SEP rather than the other way around, since it is likely that  
42 diagnoses such as chronic pain disorders, psychoses, anxiety and bipolar disorders associated with these types of  
43 drugs may affect the work ability and thus the income of a person. Income is much more sensitive to reverse  
44 causation than education, which is usually obtained early in life and remains constant once it is obtained.  
45  
46  
47  
48  
49  
50  
51  
52

53  
54  
55 Existing literature  
56  
57  
58  
59  
60



1  
2  
3  
4 In this study we argue that fillings of all-purpose and system-specific drug prescriptions to some extent serve as  
5 an indicator of general health status and of conditions like ischaemic heart disease, hypertension, COPD, and  
6 diabetes. The finding of weaker effects of SEP, when underlying familial factors were taken into account, accords  
7 with a large part of the life course literature that supports the importance of early life factors in the aetiology of  
8 chronic disease in adulthood[41, 42].  
9

10  
11  
12  
13 In addition, a number of previous twin and sibling studies have investigated the association between various  
14 SEP-indicators and health outcomes. While some studies have shown strong or some evidence of a causal effect  
15 of adult SEP[43-47] other suggest no or little effect of SEP, when familial factors have been adjusted for [48-52].  
16 Other studies show mixed results[21, 23-25, 47, 53-55]. However, the studies vary with respect to a number of  
17 important parameters hampering overall comparisons. Most importantly, investigated health outcomes differ  
18 and may have different aetiologies and show different social gradients and patterns of familial confounding, but  
19 even for specific health outcomes there is no clear picture of evidence. E.g. for mortality, two sibling-[45, 46] and  
20 two twin studies[21, 44] have investigated the association with education. Although all studies support some  
21 effect of education after controlling for shared family factors, important differences exist: The twin study by  
22 Madsen et al.(2010) demonstrated an effect of education within twins only in older cohorts of men, but not in  
23 younger men and not in women. The influence of shared family factors was thus suggested in the latter, but not  
24 in the first subgroup of this study. The two sibling studies also suggested some effect of shared family factors,  
25 while the twin study by Lundborg (2008) did not support any such effect. For self-rated health, the majority of  
26 the existing twin studies [24, 25, 54] have shown mixed results, although Osler et al. [47] and Lundborg[43] did  
27 find a statistically significant association between social class respective education and self-rated health in the  
28 intra-pair analyses. One important reason for the inconsistencies may be that many studies have suffered from  
29 power limitations in the intra-pair analyses due to a small number of events[21, 23, 25, 47, 54]. This is not a  
30 concern in this study, where almost all of the exposure discordant twins contributed with information to the  
31 intra-pair analyses, thus providing some of the most powerful twin results on social inequality in health to date.  
32  
33  
34  
35  
36  
37  
38  
39  
40  
41  
42  
43  
44  
45  
46  
47  
48  
49

#### 50 Strengths and limitations

51  
52 The twin approach is clearly a strength of this study, since it makes it possible to adjust for unmeasured  
53 background factors shared by twins that may be underlying the association between SEP and health.  
54

55 Furthermore, the large sample size and the long follow-up allow a great number of events to be analysed. In  
56  
57  
58  
59  
60

1  
2  
3  
4 addition, the use of population-based registers has the advantage of relatively little selection and measurement  
5 error in the study population. Finally, this study not only focuses on prescription medicine in general, but also on  
6 drugs targeting specific organ systems which may give us a better idea of potential mechanisms.  
7  
8

9  
10  
11 Among study limitations is the fact that filling of prescription medicine is not a perfect measure of health status.  
12 We do, however, argue that the observed association with mortality and the inverse relationship with education  
13 and income likely reflect a greater need for medicine among people of lower SEP. In case that access to health  
14 care also plays a role, presumably favouring people of high SEP, the social gradient in health status in this study  
15 could be underestimated. Although data did not contain information on over-the-counter (OTC) medication, it  
16 only constitutes a minor part of the total drug consumption in Denmark[7], and since we were interested in  
17 drugs as an indicator of health status, it could be argued that the most valid approach is to focus on drugs that  
18 require a formal medical indication (i.e. prescription).  
19  
20  
21  
22  
23  
24  
25  
26  
27

28 As models for counting processes only allow one event at a time, the number of prescription fillings was defined  
29 as the main outcome of interest. Therefore, it was reassuring that the subanalysis on DDD led to similar results.  
30  
31  
32

33  
34 Although the distribution of SEP-indicators and prescription fillings were not entirely identical in twins and the  
35 population-based sample, the associations between SEP and prescription fillings were indeed, which supports  
36 generalizability to the general population in line with previous studies that show that health and mortality in  
37 twins are similar to the background population[56, 57]. Furthermore, the fact that the analysis based only on  
38 discordant twin pairs show marginal results similar to those based on the total twin sample was reassuring.  
39  
40  
41  
42  
43  
44

#### 45 Conclusion and perspectives

46  
47 In this study, based on a comprehensive twin cohort, we observed a social inequality in fillings of prescription  
48 medicine, showing fewer prescription fillings among people with high SEP. This association attenuated within  
49 twin pairs for most types of prescription-fillings, except those targeting the nervous system. The attenuation was  
50 most pronounced in MZ twins. Measurement error can contribute to the observed attenuation of association, but  
51 it is likely to account only for a minor fraction, considering the exposure and outcome measures in this study. As  
52 for potential non-shared confounding we would, if anything, expect it to bias the estimates away from the null.  
53  
54  
55  
56  
57  
58  
59  
60

1  
2  
3  
4 We therefore interpret the findings as an indication that at least a part of the observed social inequality in  
5  
6 prescription fillings is explained by shared familial factors. The implications of these findings are by no means a  
7  
8 disqualification of SEP as a determinant of health, but rather an indication that family matters in the production  
9  
10 of social health inequalities; most likely through early environment, and possibly also genetic factors.  
11  
12 Recognizing biological components and early life exposures as important explanatory factors may improve our  
13  
14 understanding of the multifaceted aetiology of health inequalities over the life course and increase the potential  
15  
16 for effective and targeted interventions.  
17

### 18 19 **COMPETING INTERESTS**

20  
21 None.  
22

### 23 24 25 **FUNDING**

26  
27 This work is supported by a grant from the VELUX Foundation (95-103-11419), a grant from the Danish Cancer  
28  
29 Society (SU08001) and from the Danish council For Independent Research (social sciences, 09-06008). The  
30  
31 funding bodies had no influence on the contents of this paper.  
32

### 33 34 35 **CONTRIBUTORSHIP**

36  
37 KC and MO formulated the original study idea and provided funding. MM, KC, MO and A-MNA  
38  
39 further developed the study idea and design of the study. MM carried out the data analyses in  
40  
41 collaboration with PKA and MG. All authors participated in interpretation and discussion of the  
42  
43 findings. MM drafted the first version of the manuscript, but all authors have contributed to the  
44  
45 revisions and have approved the final version of the paper.  
46

### 47 48 49 **DATA SHARING**

50  
51 There are no additional data.  
52  
53  
54  
55  
56  
57  
58  
59  
60

## Reference List

1. Mackenbach JP, Stirbu I, Roskam AJ, et al. Socioeconomic inequalities in health in 22 European countries. *N Engl J Med* 2008;**358**(23):2468-2481.
2. Adler NE, Ostrove JM. Socioeconomic status and health: what we know and what we don't. *Ann N Y Acad Sci* 1999;**896**:3-15.
3. Davey SG, Hart C, Hole D, et al. Education and occupational social class: which is the more important indicator of mortality risk? *J Epidemiol Community Health* 1998;**52**(3):153-160.
4. Marmot M, Ryff CD, Bumpass LL, et al. Social inequalities in health: next questions and converging evidence. *Soc Sci Med* 1997;**44**(6):901-910.
5. Ekholm O, Kjølner M, Davidsen M, Hesse U, Eriksen L, Christensen A. Sundhed og Sygelighed i Danmark & udviklingen siden 1987 [Danish Health and Morbidity survey and trends since 1987]. Copenhagen: National Institute of Public Health; 2006.
6. Gundgaard J. Income related inequality in prescription drugs in Denmark. *Pharmacoepidemiol Drug Saf* 2005;**14**(5):307-317.
7. Danish Medicines Agency. Total sales of medicines in Denmark, 2008-2012. 2013.
8. Weitoft GR, Rosen M, Ericsson O, et al. Education and drug use in Sweden--a nationwide register-based study. *Pharmacoepidemiol Drug Saf* 2008;**17**(10):1020-1028.
9. Nielsen MW, Hansen EH, Rasmussen NK. Prescription and non-prescription medicine use in Denmark: association with socio-economic position. *Eur J Clin Pharmacol* 2003;**59**(8-9):677-684.

10. Lu CY, Barratt J, Vitry A, et al. Charlson and Rx-Risk comorbidity indices were predictive of mortality in the Australian health care setting. *J Clin Epidemiol* 2011;**64**(2):223-228.
11. Rosholm JU, Christensen K. Relationship between drug use and self-reported health in elderly Danes. *Eur J Clin Pharmacol* 1997;**53**(3-4):179-183.
12. Hershman DL, Simonoff PA, Frishman WH, et al. Drug utilization in the old old and how it relates to self-perceived health and all-cause mortality: results from the Bronx Aging Study. *J Am Geriatr Soc* 1995;**43**(4):356-360.
13. Wamala S, Merlo J, Bostrom G, et al. Socioeconomic disadvantage and primary non-adherence with medication in Sweden. *Int J Qual Health Care* 2007;**19**(3):134-140.
14. Wamala S, Merlo J, Bostrom G, et al. Perceived discrimination, socioeconomic disadvantage and refraining from seeking medical treatment in Sweden. *J Epidemiol Community Health* 2007;**61**(5):409-415.
15. Furu K, Straume B, Thelle DS. Legal drug use in a general population: association with gender, morbidity, health care utilization, and lifestyle characteristics. *J Clin Epidemiol* 1997;**50**(3):341-349.
16. Adler NE, Stewart J. Health disparities across the lifespan: meaning, methods, and mechanisms. *Ann N Y Acad Sci* 2010;**1186**:5-23.
17. Lichtenstein P, Harris JR, Pedersen NL, et al. Socioeconomic status and physical health, how are they related? An empirical study based on twins reared apart and twins reared together. *Soc Sci Med* 1993;**36**(4):441-450.

- 1  
2  
3  
4 18. Smith GD, Blane D, Bartley M. Explanations for socio-economic differentials in mortality.  
5  
6 Evidence from Britain and elsewhere. *European Journal of Public Health* 1994;(4):131-144.  
7  
8
- 9  
10 19. Gilman SE, Loucks EB. Invited commentary: does the childhood environment influence the  
11  
12 association between every x and every y in adulthood? *Am J Epidemiol* 2012;**176**(8):684-688.  
13
- 14  
15 20. Mackenbach JP. Genetics and health inequalities: hypotheses and controversies. *J Epidemiol*  
16  
17 *Community Health* 2005;**59**(4):268-273.  
18
- 19  
20 21. Madsen M, Andersen AM, Christensen K, et al. Does educational status impact adult  
21  
22 mortality in Denmark? A twin approach. *Am J Epidemiol* 2010;**172**(2):225-234.  
23
- 24  
25 22. Behrman JR, Kohler HP, Jensen VM, et al. Does more schooling reduce hospitalization and  
26  
27 delay mortality? New evidence based on Danish twins. *Demography* 2011;**48**(4):1347-1375.  
28
- 29  
30 23. Madsen M, Andersen PK, Gerster M, et al. Does the association of education with breast  
31  
32 cancer replicate within twin pairs? A register-based study on Danish female twins. *Br J*  
33  
34 *Cancer* 2011;**104**(3):520-523.  
35
- 36  
37 24. Osler M, McGue M, Christensen K. Socioeconomic position and twins' health: a life-course  
38  
39 analysis of 1266 pairs of middle-aged Danish twins. *Int J Epidemiol* 2007;**36**(1):77-83.  
40
- 41  
42 25. Fujiwara T, Kawachi I. Is education causally related to better health? A twin fixed-effect  
43  
44 study in the USA. *Int J Epidemiol* 2009;**38**(5):1310-1322.  
45  
46  
47
- 48  
49 26. Institute For Statistics. ISCED 1997 International Standard Classification of Education.  
50  
51 UNESCO; 2006.  
52  
53  
54  
55  
56  
57  
58  
59  
60

- 1  
2  
3  
4 27. Organisation for Economic Co-operation and Development. The OECD list of social  
5 indicators. Organisation for Economic Co-operation and Development; 1982.  
6  
7
- 8  
9 28. Guidelines for ATC classification and DDD assignment. 13th edition. Oslo: WHO  
10 Collaboration Centre for Drug Statistics Methodology; 2010.  
11  
12
- 13  
14 29. Skytthe A, Kyvik K, Holm NV, et al. The Danish Twin Registry: 127 birth cohorts of twins.  
15 Twin Res 2002;**5**(5):352-357.  
16  
17
- 18  
19 30. Christiansen L, Frederiksen H, Schousboe K, et al. Age- and sex-differences in the validity of  
20 questionnaire-based zygosity in twins. Twin Res 2003;**6**(4):275-278.  
21  
22
- 23  
24 31. Cook RJ, Lawless JF. Methods based on Counts and Rate Functions. The Statistical Analysis  
25 of Recurrent Events. New York: Springer; 2007.  
26  
27
- 28  
29 32. Lin DY. Linear regression analysis of censored medical costs. Biostatistics 2000;**1**(1):35-47.  
30  
31
- 32  
33 33. Frisell T, Oberg S, Kuja-Halkola R, et al. Sibling comparison designs: bias from non-shared  
34 confounders and measurement error. Epidemiology 2012;**23**(5):713-720.  
35  
36
- 37  
38 34. Kaufman JS, Glymour MM. Splitting the differences: problems in using twin controls to study  
39 the effects of BMI on mortality. Epidemiology 2011;**22**(1):104-106.  
40  
41
- 42  
43 35. Frisell T, Pawitan Y, Langstrom N. Is the association between general cognitive ability and  
44 violent crime caused by family-level confounders? PLoS One 2012;**7**(7):e41783.  
45  
46
- 47  
48 36. Carlsson S, Andersson T, de FU, et al. Body mass index and mortality: is the association  
49 explained by genetic factors? Epidemiology 2011;**22**(1):98-103.  
50  
51  
52  
53  
54  
55  
56  
57  
58  
59  
60

- 1  
2  
3  
4 37. Nielsen MW, Gundgaard J, Hansen EH, et al. Use of six main drug therapeutic groups across  
5 educational groups: self-reported survey and prescription records. *J Clin Pharm Ther*  
6 2005;**30**(3):259-269.  
7  
8  
9  
10  
11 38. van Doorslaer E, Masseria C, Koolman X. Inequalities in access to medical care by income in  
12 developed countries. *CMAJ* 2006;**174**(2):177-183.  
13  
14  
15  
16  
17 39. Horwitz AV, Videon TM, Schmitz MF, et al. Rethinking twins and environments: possible  
18 social sources for assumed genetic influences in twin research. *J Health Soc Behav*  
19 2003;**44**(2):111-129.  
20  
21  
22  
23  
24 40. Mitchell KS, Mazzeo SE, Bulik CM, et al. An investigation of a measure of twins' equal  
25 environments. *Twin Res Hum Genet* 2007;**10**(6):840-847.  
26  
27  
28  
29  
30 41. Kuh D, Ben-Shlomo Y, susser E. *A Life Course Approach to Chronic Disease Epidemiology*.  
31 2nd ed. New York: Oxford University Press; 2004.  
32  
33  
34  
35 42. Galobardes B, Lynch JW, Smith GD. Is the association between childhood socioeconomic  
36 circumstances and cause-specific mortality established? Update of a systematic review. *J*  
37 *Epidemiol Community Health* 2008;**62**(5):387-390.  
38  
39  
40  
41  
42  
43 43. Lundborg P. *The Health Returns to Education: What Can We Learn from Twins?* IZA  
44 Discussion Paper 2008;(3399):1-32.  
45  
46  
47  
48 44. Lundborg P, Lyttkens CH, Nystedt P. *Human Capital and Longevity. Evidence from 70,000*  
49 *MZ and DZ Twins*. Lund University, Sweden.; 2011.  
50  
51  
52  
53  
54 45. Sondergaard G, Mortensen L, Andersen P, Madsen M, Nybo Andersen A, Osler M. Does  
55 shared family background influence educational differences in mortality? 2011.  
56  
57  
58  
59  
60



- 1  
2  
3  
4 46. Naess O, Hoff DA, Lawlor D, et al. Education and adult cause-specific mortality--examining  
5 the impact of family factors shared by 871 367 Norwegian siblings. *Int J Epidemiol*  
6 2012;**41**(6):1683-1691.  
7  
8  
9  
10  
11 47. Osler M, Madsen M, Nybo Andersen AM, et al. Do childhood and adult socioeconomic  
12 circumstances influence health and physical function in middle-age? *Soc Sci Med*  
13 2009;**68**(8):1425-1431.  
14  
15  
16  
17  
18 48. Mortensen LH. Socioeconomic inequality in birth weight and gestational age in Denmark  
19 1996-2007: using a family-based approach to explore alternative explanations. *Soc Sci Med*  
20 2013;**76**(1):1-7.  
21  
22  
23  
24  
25  
26  
27 49. Lawlor DA, Clark H, Davey SG, et al. Childhood intelligence, educational attainment and  
28 adult body mass index: findings from a prospective cohort and within sibling-pairs analysis.  
29 *Int J Obes (Lond)* 2006;**30**(12):1758-1765.  
30  
31  
32  
33  
34 50. Gilman SE, Martin LT, Abrams DB, et al. Educational attainment and cigarette smoking: a  
35 causal association? *Int J Epidemiol* 2008;**37**(3):615-624.  
36  
37  
38  
39  
40 51. Behrman JR, Kohler HP, Jensen VM, et al. Does more schooling reduce hospitalization and  
41 delay mortality? New evidence based on Danish twins. *Demography* 2011;**48**(4):1347-1375.  
42  
43  
44  
45 52. Amin V, Behrman J, Spector TD. Does more schooling improve health behaviours and health  
46 outcomes? Evidence from UK twins. London: Royal Holloway, University of London; 2009.  
47  
48  
49  
50 53. Webbink D, Martin NG, Visscher PM. Does education reduce the probability of being  
51 overweight? *Journal of Health Economics* 2010;**29**(1):29-38.  
52  
53  
54  
55  
56  
57  
58  
59  
60

- 1  
2  
3  
4 54. Krieger N, Chen JT, Coull BA, et al. Lifetime socioeconomic position and twins' health: an  
5  
6 analysis of 308 pairs of United States women twins. PLoS Med 2005;**2**(7):e162.  
7  
8  
9  
10 55. Sondergaard G, Mortensen LH, Andersen AM, et al. Social inequality in breast, lung and  
11  
12 colorectal cancers: a sibling approach. BMJ Open 2013;**3**(3).  
13  
14  
15 56. Christensen K, Wienke A, Skytthe A, et al. Cardiovascular mortality in twins and the fetal  
16  
17 origins hypothesis. Twin Res 2001;**4**(5):344-349.  
18  
19  
20 57. Christensen K, Vaupel JW, Holm NV, et al. Mortality among twins after age 6: fetal origins  
21  
22 hypothesis versus twin method. BMJ 1995;**310**(6977):432-436.  
23  
24  
25  
26  
27  
28  
29  
30  
31  
32  
33  
34  
35  
36  
37  
38  
39  
40  
41  
42  
43  
44  
45  
46  
47  
48  
49  
50  
51  
52  
53  
54  
55  
56  
57  
58  
59  
60

**Supplementary table 1: Description of the largest groups ( $\geq 2\%$  of the total number of prescription fillings) of drugs at the 3-digit and 4-digit level of ATC-codes within each of the analysed main drug categories.**

| Organ system                    | ATC-codes          |               | Type of drugs                                                   | % of total number of prescription fillings   |
|---------------------------------|--------------------|---------------|-----------------------------------------------------------------|----------------------------------------------|
|                                 | 3-digit level      | 4-digit level |                                                                 |                                              |
| Circulatory system              | C03                |               | <b>Diuretics</b>                                                | <b>4.40</b>                                  |
|                                 |                    | C03A          | Low-ceiling diuretics, thiazides                                | 1.93                                         |
|                                 |                    | C03B          | Low-ceiling diuretics, excl. thiazides                          | 0.09                                         |
|                                 |                    | C03C          | High-ceiling diuretics                                          | 1.60                                         |
|                                 |                    | C03D          | Potassium-sparing agents                                        | 0.32                                         |
|                                 |                    | C03E          | Diuretics and potassium-sparing agents in combination           | 0.47                                         |
|                                 | C07                |               | <b>Beta blocking agents</b>                                     | <b>2.94</b>                                  |
|                                 |                    | C07A          | Beta blocking agents                                            | 2.83                                         |
|                                 |                    | C07B          | Beta blocking agents and thiazides                              | 0.03                                         |
|                                 |                    | C07C          | Beta blocking agents and other diuretics                        | 0.06                                         |
|                                 |                    | C07F          | Beta blocking agents and other hypertensives                    | 0.02                                         |
|                                 | C08                |               | <b>Calcium channel blockers</b>                                 | <b>2.68</b>                                  |
|                                 |                    | C08C          | Selective calcium channel blockers with mainly Vascular effects | 1.81                                         |
|                                 |                    | C08D          | Selective calcium channel blockers with direct cardiac effects  | 0.87                                         |
|                                 |                    |               | <b>Agents acting on the renin-angiotensin system</b>            | <b>3.83</b>                                  |
|                                 | C09                | C09A          | ACE inhibitors, plain                                           | 2.22                                         |
|                                 |                    | C09B          | ACE inhibitors, combinations                                    | 0.21                                         |
|                                 |                    | C09C          | Angiotensin ii antagonists, plain                               | 0.93                                         |
|                                 |                    | C09D          | Angiotensin ii antagonists, combinations                        | 0.46                                         |
|                                 | C10                |               | <b>Lipid modifying agents</b>                                   | <b>2.00</b>                                  |
|                                 |                    | C10A          | Lipid modifying agents, plain                                   | 2.00                                         |
| Nervous system                  | N02                |               | <b>Analgesics</b>                                               | <b>10.09</b>                                 |
|                                 |                    | N02A          | Opioids                                                         | 4.88                                         |
|                                 |                    | N02B          | Other analgesics and antipyretics                               | 3.98                                         |
|                                 |                    | N02C          | Antimigraine preparations                                       | 1.22                                         |
|                                 | N05                |               | <b>Psycholeptics</b>                                            | <b>10.71</b>                                 |
|                                 |                    | N05A          | Antipsychotics                                                  | 1.97                                         |
|                                 |                    | N05B          | Anxiolytics                                                     | 4.93                                         |
|                                 |                    | N05C          | Hypnotics and sedatives                                         | 3.81                                         |
|                                 | N06                |               | <b>Psychoanaleptics</b>                                         | <b>4.16</b>                                  |
|                                 |                    | N06A          | Antidepressants                                                 | 4.07                                         |
|                                 |                    | N06B          | Psychostimulants, agents used for adhd and Nootropics           | 0.02                                         |
|                                 |                    | N06D          | Antidementia drugs                                              | 0.07                                         |
|                                 | Respiratory system | R03           |                                                                 | <b>Drugs for obstructive airway diseases</b> |
| R03A                            |                    |               | Adrenergics, inhalants                                          | 4.14                                         |
| R03B                            |                    |               | Other drugs for obstructive airway diseases, inhalants          | 2.12                                         |
| R03C                            |                    |               | Adrenergics for systemic use                                    | 0.43                                         |
| R03D                            |                    |               | Other systemic drugs for obstructive airway diseases            | 0.42                                         |
| Alimentary tract and metabolism | A02                |               | <b>Drugs for acid related disorders</b>                         | <b>3.67</b>                                  |
|                                 |                    | A02A          | Antiacids                                                       | 0.3                                          |
|                                 |                    | A02B          | Drugs for peptic ulcer and gastro-oesophageal reflux disease    | 3.4                                          |
|                                 | A10                |               | <b>Drugs used in diabetes</b>                                   | <b>2.68</b>                                  |
|                                 |                    | A10A          | Insulins and analogues                                          | 1.1                                          |
|                                 |                    | A10B          | Blood glucose lowering drugs, excl. insulins                    | 1.6                                          |
|                                 |                    |               |                                                                 | <b>54.3</b>                                  |

STROBE Statement—Checklist of items that should be included in reports of *cohort studies*

|                              | Item No | Recommendation                                                                                                                                                                                                                                                                                                                                                                                                |
|------------------------------|---------|---------------------------------------------------------------------------------------------------------------------------------------------------------------------------------------------------------------------------------------------------------------------------------------------------------------------------------------------------------------------------------------------------------------|
| <b>Title and abstract</b>    | 1       | (a) Indicate the study's design with a commonly used term in the title or the abstract<br>(b) Provide in the abstract an informative and balanced summary of what was done and what was found                                                                                                                                                                                                                 |
| <b>Introduction</b>          |         |                                                                                                                                                                                                                                                                                                                                                                                                               |
| Background/rationale         | 2       | Explain the scientific background and rationale for the investigation being reported                                                                                                                                                                                                                                                                                                                          |
| Objectives                   | 3       | State specific objectives, including any prespecified hypotheses                                                                                                                                                                                                                                                                                                                                              |
| <b>Methods</b>               |         |                                                                                                                                                                                                                                                                                                                                                                                                               |
| Study design                 | 4       | Present key elements of study design early in the paper                                                                                                                                                                                                                                                                                                                                                       |
| Setting                      | 5       | Describe the setting, locations, and relevant dates, including periods of recruitment, exposure, follow-up, and data collection                                                                                                                                                                                                                                                                               |
| Participants                 | 6       | (a) Give the eligibility criteria, and the sources and methods of selection of participants. Describe methods of follow-up<br>(b) For matched studies, give matching criteria and number of exposed and unexposed                                                                                                                                                                                             |
| Variables                    | 7       | Clearly define all outcomes, exposures, predictors, potential confounders, and effect modifiers. Give diagnostic criteria, if applicable                                                                                                                                                                                                                                                                      |
| Data sources/<br>measurement | 8*      | For each variable of interest, give sources of data and details of methods of assessment (measurement). Describe comparability of assessment methods if there is more than one group                                                                                                                                                                                                                          |
| Bias                         | 9       | Describe any efforts to address potential sources of bias                                                                                                                                                                                                                                                                                                                                                     |
| Study size                   | 10      | Explain how the study size was arrived at                                                                                                                                                                                                                                                                                                                                                                     |
| Quantitative variables       | 11      | Explain how quantitative variables were handled in the analyses. If applicable, describe which groupings were chosen and why                                                                                                                                                                                                                                                                                  |
| Statistical methods          | 12      | (a) Describe all statistical methods, including those used to control for confounding<br>(b) Describe any methods used to examine subgroups and interactions<br>(c) Explain how missing data were addressed<br>(d) If applicable, explain how loss to follow-up was addressed<br>(e) Describe any sensitivity analyses                                                                                        |
| <b>Results</b>               |         |                                                                                                                                                                                                                                                                                                                                                                                                               |
| Participants                 | 13*     | (a) Report numbers of individuals at each stage of study—eg numbers potentially eligible, examined for eligibility, confirmed eligible, included in the study, completing follow-up, and analysed<br>(b) Give reasons for non-participation at each stage<br>(c) Consider use of a flow diagram                                                                                                               |
| Descriptive data             | 14*     | (a) Give characteristics of study participants (eg demographic, clinical, social) and information on exposures and potential confounders<br>(b) Indicate number of participants with missing data for each variable of interest<br>(c) Summarise follow-up time (eg, average and total amount)                                                                                                                |
| Outcome data                 | 15*     | Report numbers of outcome events or summary measures over time                                                                                                                                                                                                                                                                                                                                                |
| Main results                 | 16      | (a) Give unadjusted estimates and, if applicable, confounder-adjusted estimates and their precision (eg, 95% confidence interval). Make clear which confounders were adjusted for and why they were included<br>(b) Report category boundaries when continuous variables were categorized<br>(c) If relevant, consider translating estimates of relative risk into absolute risk for a meaningful time period |

|                          |    |                                                                                                                                                                            |
|--------------------------|----|----------------------------------------------------------------------------------------------------------------------------------------------------------------------------|
| Other analyses           | 17 | Report other analyses done—eg analyses of subgroups and interactions, and sensitivity analyses                                                                             |
| <b>Discussion</b>        |    |                                                                                                                                                                            |
| Key results              | 18 | Summarise key results with reference to study objectives                                                                                                                   |
| Limitations              | 19 | Discuss limitations of the study, taking into account sources of potential bias or imprecision. Discuss both direction and magnitude of any potential bias                 |
| Interpretation           | 20 | Give a cautious overall interpretation of results considering objectives, limitations, multiplicity of analyses, results from similar studies, and other relevant evidence |
| Generalisability         | 21 | Discuss the generalisability (external validity) of the study results                                                                                                      |
| <b>Other information</b> |    |                                                                                                                                                                            |
| Funding                  | 22 | Give the source of funding and the role of the funders for the present study and, if applicable, for the original study on which the present article is based              |

\*Give information separately for exposed and unexposed groups.

**Note:** An Explanation and Elaboration article discusses each checklist item and gives methodological background and published examples of transparent reporting. The STROBE checklist is best used in conjunction with this article (freely available on the Web sites of PLoS Medicine at <http://www.plosmedicine.org/>, Annals of Internal Medicine at <http://www.annals.org/>, and Epidemiology at <http://www.epidem.com/>). Information on the STROBE Initiative is available at <http://www.strobe-statement.org>.

## ARTICLE SUMMARY

### Article focus

- To investigate if the association between socio-economic factors and filling of drug prescriptions persists after controlling for genetic and childhood factors shared within twins.

### Key messages

- The inverse association between socio-economic factors and filling of prescription medicine show substantial attenuation in intra-pair analyses of twins, except for drugs targeting the [neurologienervous](#) system.
- Greater attenuation within monozygotic than dizygotic same sex twins.
- [Shared F](#)amilial factors seem to account for at least part of the observed social inequality in fillings of prescription medicine.

### Strengths and limitations

- This study is based on nation-wide register data covering more than a decade, and we present results from a largely unselected population of more than 8000 monozygotic and 15,000 dizygotic same sexed twins.
- This is the first twin study on health inequalities to report such clear-cut findings with sufficient power for meaningful interpretation of intra-pair analyses and for comparison of zygosity-specific results.
- Prescription fillings are not a perfect measure of health status, but we still argue that it is an inventive and fairly valid indicator in a Danish setting where prescription medicine has to be prescribed by a medical doctor and accounts for 96% of the total drug sale.
- The twin study is clearly a powerful approach, but when interpreting findings, alternative explanations for the pattern of attenuation should be considered, including measurement error and unshared confounding. However, in this case we find it unlikely that these potential sources of bias could fully explain our findings.

## INTRODUCTION

Social inequalities in health and health behaviour have been widely demonstrated in many societies, including the Scandinavian countries[1]. Often social disparities in health are not confined to the most marginalized groups of society but are expressed as a gradient over the entire spectrum of social stratification[2]. The inverse relationship between socio-economic position (SEP) and health has consistently been observed across different social indicators and for numerous types of health outcomes[3, 4]. Use of prescription medicine is one health-related outcome that has been found to be socially patterned, where Danish data have shown a greater use among people with low SEP compared to people with high SEP[5, 6]. Denmark has a tax financed decentralized health care system with a partly need-dependent reimbursement system for outpatient prescription drugs. All prescription-drugs have to be prescribed by a medical doctor and, compared to a number of other countries, prescription medicine constitute the majority a fairly large proportion of the total drug sale in Denmark (app. 90%)[7]. Many studies have shown substantially reduced social differences in drug use when health status have been taken into account[6, 8, 9], which may indicate that filling of prescription medicine to a large extent reflects health status. This is supported by the fact that comorbidity indices, based on prescription drug dispensings, have been established as strong predictors of mortality[10], and that drug use has proven to be a valid indicator of self-rated health[11, 12]. However, other factors such as health care seeking behaviour and access to health care[13, 14] may also influence drug use, but the social gradient in these factors would, theoretically, be expected to be opposite that of health status, i.e. greater drug use among people with high SEP compared to low SEP. Such a positive association is generally not supported by the existing Danish literature[5, 6, 15].

Although well-established, the inverse association between SEP and health and health behaviour is not clearly understood, but many factors during the life course may play a role in the production of these social health differences. Suggested Possible pathways but is likely to be driven via a number of different pathways, including Mmaterial deprivation, behavioural factors, and psychological factors[16]. It has also been suggested that it is not SEP in adulthood per se that influences health, but underlying familial factors already at play in early life [17, 18], e.g. rearing environment or genetic make-up are associated both with the obtainment of adult SEP and health status later in life already at play in early life [17, 18]. In a recent commentary, Gilman & Loucks (2012) discuss why childhood environment may be such an important underlying factor in the production of social health differences. They argue that because childhood encompasses

developmentally sensitive periods for the acquisition of cognitive-, psychologic-, and social skills that have a profound impact on an individual's capacity for long term health and provide opportunities (and constraints) for adult socioeconomic conditions, it can potentially influence the association between any adult risk factor and later life health[19].The potential role of genetic setup in explaining health inequalities is reviewed by Mackenbach (2005), who suggests that the most plausible set of hypotheses relates to genetic influences of personal attributes such as cognitive ability, personality, and bodily and mental fitness that may influence both SEP and adult health status[20].

With the discordant twin pair design, it is possible to investigate the effect of adult SEP on prescription fillings eliminating confounding from factors shared by a pair of twins, exploiting that twins are partly or fully genetically identical and have experienced a similar childhood environment due to their common upbringing.

This approach has been applied in a number of previous twin studies investigating different health outcomes, including mortality[21][19], hospitalizations[22][20], breast cancer[23][21], and also softer endpoints such as depression scores and self-rated health[24, 25][22, 23]. However, the majority of these studies suffer from power limitations either due to small sample sizes and/or rare outcomes making interpretations difficult.

In this study we aimed to investigate if there was an effect of SEP in adulthood on the number of prescription fillings above and beyond the effect of shared familial factors. Filling of prescription medicine is a quantitative health measure rendering sufficient power for the intra-pair comparisons. Differences in genetic relatedness between monozygotic (MZ) (genetically identical) and dizygotic (DZ) twins (share on average 50% of segregating genes) may further give an indication of the possible types of confounding (i.e. genetic or environmental factors). In a theoretical situation of no measurement error and no confounding from unshared factors, genetic confounding would be indicated if an observed social gradient in prescription medicine was partly attenuated in DZ twins and fully attenuated in MZ twins, when shared familial factors had been taken into account. Likewise, an attenuation of similar size in DZ and MZ twins would be compatible with shared environmental confounding. Finally, to support a SEP-effect on prescription fillings not due to confounding from shared familial factors, the association would have to persist in both DZ and MZ twins.

To support the utility of prescription medicine as a health indicator we also analysed its association with mortality.



## METHODS

### Study population

Data from the Danish Twin Registry was linked with information in the Danish Registry of Medicinal Products and administrative registers in Statistics Denmark. The study population consisted of 24 370 twins, including 8582 monozygotic and 15 788 dizygotic same sex twins (DZSS), who were born during 1921-1965 and alive and resident in Denmark at the beginning of follow-up (January 1 1995), after exclusions due to triplets (n=384) unknown zygosity (UZ) (n=3731), and dizygotic opposite sex pairs (DZOS) (n=16 710), missing data on education or income (n=845), and non-intact twin pairs in which one twin was dead, emigrated, or had missing information (n=2847). To evaluate the representativeness of the results from the unpaired twin analyses, we also analysed a 5% population-based sample of the Danish population (n=137 300).

### Social indicators

We used information on highest attained education in 1995 at age 30+ of the study population, categorized according to the International Standard Classification of Education of 1997<sup>[26][24]</sup> into: primary/lower secondary education (basic compulsory education), upper secondary education (secondary), and tertiary education (Bachelor's degree and above). Income was measured as an average of the equivalised gross household income (Danish currency) in 1994-1995, grouped into quartiles within each birth cohort.

"Equivalised" income is adjusted to take into account that households can share resources. Inspired by the standard OECD equivalence scale<sup>[27][25]</sup>, the household-denominator was constructed according to an equivalence scale that assigned a value of 1 to the first household member, of 0.7 to the second household member and of 0.5 to each additional household member. [Calculating quartiles by birth cohort is aiming at taking into account that income is not fully comparable at different ages during the life course. An implication of this is that the income measure reflects a relative rather than absolute income level.](#)

Field Code Changed

### Prescription medicine

The Danish Registry of Medicinal Products [was established in 1995 and](#) contains information on the total sale of prescription medicine in Denmark registered by the pharmacies via a computerized accounting system. The drug information is recorded according to the Anatomical Therapeutic Chemical classification system (ATC)<sup>[28][26]</sup> where the active substances in drugs are divided into different groups, primarily according to the organ system

1  
2  
3  
4  
5  
6  
7  
8 on which they act. Other information includes date of dispensing and *daily defined doses* (DDD), defined as the  
9 assumed average maintenance dose per day for a drug used for its main indication in adults<sup>[28][26]</sup>. Outcomes  
10 of interest were defined as the number of prescription fillings during follow-up for all-purpose medication (ACT-  
11 groups: A,B,C,D,G,H,I,L,M,N,P,O,R,S,V, excluding ~~the ATC groups Q~~, which is for veterinary use, and G02B and  
12 G03A, which are for contraceptive use) and four groups of system-specific medication: ATC-C (heart/circulatory  
13 system), ATC-N (nervous system), ATC-R (respiratory system) and ATC-A (alimentary tract/metabolism). If no  
14 ATC-code was assigned a prescription, it was excluded (1%). DDD was used as a supplementary outcome  
15 measure.  
16  
17  
18  
19  
20

### 21 22 **Other covariates**

23 Sex and age were included in the analyses. Analyses were performed separately for MZ and DZSS twins. Zygosity  
24 had previously been determined by questionnaire<sup>[29][27]</sup>, a method that has proven valid with an overall  
25 misclassification frequency of less than 5% validated against a classification based on genetic markers <sup>[30][28]</sup>.  
26  
27  
28  
29

### 30 31 **Data analysis**

32 Analyses were carried out using Cox regression for recurrent events (proportional means regression), thereby  
33 accommodating multiple events (prescription fillings) per individual<sup>[31][29]</sup>. Age was used as underlying time-  
34 variable and subjects were followed from age at baseline to the age at end of follow-up (Dec 31 2005) or death or  
35 emigration, and the timing of each prescription filling during this period was recorded. Both unpaired and intra-  
36 pair analyses were performed. In the unpaired analyses robust standard errors were used to account for the  
37 interdependence of observations within pairs and within each individual. Results of the unpaired analyses were  
38 compared to the intra-pair analyses, which were performed using a stratified Cox model:  $EN_{ij}(t) = \mu_{0j}(t)e^{\beta'z_{ij}}$ . Here  
39  $EN_{ij}(t)$  denotes the mean number of prescription fillings at time  $t$  for an individual  $i$  belonging to twin pair  $j$ ,  $\mu_{0j}(t)$   
40 is the pair-specific baseline mean, and  $e^{\beta}$  is the effect of the covariates adjusted for shared familial factors. Thus,  
41 in this analysis the mean number of prescription fillings were compared within twin pairs, thereby controlling  
42 for familial factors shared within a pair of twins. In the stratified model only SEP-discordant twin pairs  
43 contribute information to the beta-parameter for SEP, although concordant pairs may contribute information to  
44 other beta-parameters.  
45  
46  
47  
48  
49  
50  
51  
52  
53  
54

1  
2  
3  
4  
5  
6  
7  
8 As counting process models do not allow simultaneous events, only one prescription of interest per day was  
9 included in the analysis.

10 Analyses were performed separately for zygosity and sex, and potential interactions between the social  
11 indicators and zygosity, sex, and age, respectively, were evaluated by including interaction terms in the models  
12 and using Wald test-statistics. To analyse the association between prescriptions and mortality, we used a Cox  
13 regression model, continuously updating the number of prescription fillings over time. Descriptive intra-pair  
14 correlations were calculated as polychoric correlation coefficients.  
15  
16  
17  
18  
19

### 20 **Subanalyses**

21 Since DDD may reflect the actual drug use more precisely than number of prescription fillings, mean DDD were  
22 also analysed by means of a fixed-effects linear regression model taking censoring into account<sup>[32][30]</sup>. This  
23 was treated as a subanalysis due to the highly right-skewed distribution of DDD, making linear regression a less  
24 optimal choice of model.  
25  
26  
27  
28  
29

30 Permission for linkage and use of data for this study was obtained from the Danish Data Protection Board (2000-  
31 54-0047).  
32  
33  
34  
35  
36  
37  
38  
39  
40  
41  
42  
43  
44  
45  
46  
47  
48  
49  
50  
51  
52  
53  
54

1  
2  
3  
4  
5  
6  
7  
8  
9  
10  
11  
12  
13  
14  
15  
16  
17  
18  
19  
20  
21  
22  
23  
24  
25  
26  
27  
28  
29  
30  
31  
32  
33  
34  
35  
36  
37  
38  
39  
40  
41  
42  
43  
44  
45  
46  
47  
48  
49  
50  
51  
52  
53  
54  
55  
56  
57  
58  
59  
60

**RESULTS**

According to table 1, showing the distribution of education and income in the population, men were better educated than women. Generally, the education of the twin population was comparable to that of the population-based sample. Only UZ twins had a markedly lower educational status and a higher proportion of missing information. The table also shows the mean income within each quartile. Twins have a somewhat higher mean income compared to the population-based sample.

For peer review only

**Table 1: Descriptives on Educational Status and Income in a 5% Population Based Sample (n=144749) and a Population of Danish Twins (n=48887), Including Intact and Non-intact Twin Pairs, Stratified on Sex and Zygosity.**

|                                       | 5% population sample |                |        |        | All twins (n=48887) |                | DZSS (n=18426) |        | MZ (n=9636) |                | DZOS (n=16710) |                | UZ (n=3731) |                |      |     |
|---------------------------------------|----------------------|----------------|--------|--------|---------------------|----------------|----------------|--------|-------------|----------------|----------------|----------------|-------------|----------------|------|-----|
|                                       | N                    | % <sup>a</sup> | Mean   | SD     | n                   | % <sup>a</sup> | Mean           | SD     | N           | % <sup>a</sup> | n              | % <sup>a</sup> | n           | % <sup>a</sup> |      |     |
| <b>Sex</b>                            |                      |                |        |        |                     |                |                |        |             |                |                |                |             |                |      |     |
| <b>Educational status<sup>b</sup></b> |                      |                |        |        |                     |                |                |        |             |                |                |                |             |                |      |     |
| <i>Men</i>                            |                      |                |        |        |                     |                |                |        |             |                |                |                |             |                |      |     |
| Primary                               | 23550                | 32             |        |        | 8909                | 35             |                |        | 3553        | 36             | 1517           | 31             | 2882        | 34             | 957  | 43  |
| Secondary                             | 31336                | 43             |        |        | 11237               | 44             |                |        | 4309        | 44             | 2292           | 47             | 3834        | 45             | 802  | 36  |
| Tertiary                              | 13722                | 19             |        |        | 4515                | 18             |                |        | 1685        | 17             | 963            | 20             | 1530        | 18             | 337  | 15  |
| Missing                               | 4072                 | 6              |        |        | 800                 | 3              |                |        | 310         | 3              | 128            | 3              | 208         | 2              | 154  | 7   |
| Total                                 | 72680                | 100            |        |        | 25461               | 100            |                |        | 9857        | 100            | 4900           | 101            | 8454        | 99             | 2250 | 101 |
| <i>Women</i>                          |                      |                |        |        |                     |                |                |        |             |                |                |                |             |                |      |     |
| Primary                               | 31215                | 43             |        |        | 10182               | 44             |                |        | 3857        | 45             | 1903           | 40             | 3633        | 44             | 789  | 53  |
| Secondary                             | 23809                | 33             |        |        | 7805                | 34             |                |        | 2868        | 34             | 1730           | 37             | 2807        | 34             | 400  | 27  |
| Tertiary                              | 14229                | 20             |        |        | 4613                | 20             |                |        | 1696        | 20             | 1004           | 21             | 1705        | 21             | 208  | 14  |
| Missing                               | 2816                 | 4              |        |        | 442                 | 2              |                |        | 148         | 2              | 99             | 2              | 111         | 1              | 84   | 6   |
| Total                                 | 72069                | 100            |        |        | 23042               | 100            |                |        | 8569        | 101            | 4736           | 100            | 8256        | 100            | 1481 | 100 |
| <b>Income (DKK)</b>                   |                      |                |        |        |                     |                |                |        |             |                |                |                |             |                |      |     |
| <i>Men</i>                            |                      |                |        |        |                     |                |                |        |             |                |                |                |             |                |      |     |
| 1st quartile                          | 17348                | 24             | 88537  | 28373  | 5931                | 24             | 92330          | 27563  | 2251        | 23             | 1061           | 22             | 1929        | 23             | 690  | 31  |
| 2nd quartile                          | 17510                | 24             | 145676 | 25887  | 6523                | 24             | 149367         | 24179  | 2563        | 26             | 1208           | 25             | 2201        | 26             | 551  | 24  |
| 3rd quartile                          | 17976                | 25             | 191360 | 34863  | 6769                | 25             | 196738         | 31365  | 2612        | 27             | 1375           | 28             | 2246        | 27             | 536  | 24  |
| 4th quartile                          | 18228                | 25             | 311232 | 141784 | 5960                | 25             | 314180         | 225459 | 2340        | 24             | 1218           | 25             | 2006        | 24             | 396  | 18  |
| Missing                               | 1618                 | 2              |        |        | 278                 | 2              |                |        | 91          | 1              | 38             | 1              | 72          | 1              | 77   | 3   |
| Total                                 | 72680                | 100            |        |        | 25461               | 100            |                |        | 9875        | 101            | 4900           | 101            | 8454        | 101            | 2250 | 100 |
| <i>Women</i>                          |                      |                |        |        |                     |                |                |        |             |                |                |                |             |                |      |     |
| 1st quartile                          | 18958                | 26             | 88201  | 26316  | 6070                | 26             | 91205          | 25698  | 2174        | 25             | 1158           | 24             | 2200        | 27             | 538  | 36  |
| 2nd quartile                          | 18219                | 25             | 142746 | 27689  | 6077                | 25             | 146427         | 25562  | 2316        | 27             | 1222           | 26             | 2186        | 27             | 353  | 24  |
| 3rd quartile                          | 17753                | 25             | 18942  | 36067  | 5795                | 25             | 194968         | 33291  | 2152        | 25             | 1224           | 26             | 2106        | 26             | 313  | 21  |
| 4th quartile                          | 16126                | 22             | 308876 | 225888 | 4941                | 22             | 312063         | 173113 | 1882        | 22             | 1097           | 23             | 1730        | 21             | 232  | 16  |
| Missing                               | 1013                 | 1              |        |        | 159                 | 1              |                |        | 45          | 1              | 35             | 1              | 34          | 0              | 45   | 3   |
| Total                                 | 72069                | 99             |        |        | 23042               | 99             |                |        | 8569        | 100            | 4736           | 100            | 8256        | 101            | 1481 | 100 |
|                                       |                      |                |        |        |                     |                |                |        | 2251        | 23             | 1061           | 22             | 1929        | 23             | 690  | 31  |

DZSS=Dizygotic same sex twins; MZ=Monozygotic twins; DZOS=Dizygotic opposite sex twins; UZ=Unknown zygosity, <sup>a</sup>May not sum to 100 because of rounding, <sup>b</sup>International Standard Classification of Education, <sup>c</sup>Average of equalized gross household income in 1994-1995 in quartiles. DKK=Danish Crowns.

The proportion of education-discordant twin pairs was 30% for MZ twins and 42% for DZSS twins, while 61% MZ twins and 68% DZSS twins were discordant on income (table 2).

**Table 2: Descriptives on Intra-Pair Discordances on Educational Status and Income, Stratified on Zygosity in a Population of Danish Twins (n=24370).**

|                                                      | DZSS<br>(n=15788) |                | MZ<br>(n=8582) |                |
|------------------------------------------------------|-------------------|----------------|----------------|----------------|
|                                                      | N                 | % <sup>a</sup> | n              | % <sup>a</sup> |
| <b>Educational status</b>                            |                   |                |                |                |
| Primary vs Secondary                                 | 3590              | 23             | 1460           | 17             |
| Primary vs Tertiary                                  | 900               | 6              | 316            | 4              |
| Secondary vs Tertiary                                | 2194              | 14             | 820            | 10             |
| Any discordance                                      | 6684              | 42             | 2596           | 30             |
| <b>Income</b>                                        |                   |                |                |                |
| 1 <sup>st</sup> quartile vs 2 <sup>nd</sup> quartile | 2048              | 13             | 1072           | 12             |
| 1 <sup>st</sup> quartile vs 3 <sup>rd</sup> quartile | 1706              | 11             | 754            | 9              |
| 1 <sup>st</sup> quartile vs 4 <sup>th</sup> quartile | 1158              | 7              | 490            | 6              |
| 2 <sup>nd</sup> quartile vs 3 <sup>rd</sup> quartile | 2266              | 14             | 1194           | 14             |
| 2 <sup>nd</sup> quartile vs 4 <sup>th</sup> quartile | 1574              | 10             | 682            | 8              |
| 3 <sup>rd</sup> quartile vs 4 <sup>th</sup> quartile | 2000              | 13             | 1080           | 13             |
| Any discordance                                      | 10 752            | 68             | 5272           | 61             |

DZSS=Dizygotic same sexed twins; MZ=Monozygotic twins; <sup>a</sup>May not sum to 100 because of rounding.

In the twin population, 1.9% did not redeem any drug prescriptions during the total follow-up period and 25% redeemed less than one prescription/year, on average (results not shown). Overall, women filled more prescriptions than men for all age groups and the number of prescription fillings increased with age in both sexes (table 3).

**Table 3: The Mean Number of Prescription Fillings After 1 and 10 Years of Follow-up in a 5% Population Based Sample and a Population of Danish Twins, Stratified on Age and Sex.**

| Type of drugs                                    | Nelson Aalen Cumulative Hazard |          |                  |          |
|--------------------------------------------------|--------------------------------|----------|------------------|----------|
|                                                  | 5 % pop. (n= 137 300)          |          | Twins (n=24 370) |          |
| Age                                              | 1 year                         | 10 years | 1 year           | 10 years |
| <b>All purpose</b>                               |                                |          |                  |          |
| 30-44 years                                      |                                |          |                  |          |
| Men                                              | 2.5                            | 28.7     | 2.2              | 25.9     |
| Women                                            | 4.1                            | 44.5     | 3.8              | 41.1     |
| 45-59 years                                      |                                |          |                  |          |
| Men                                              | 3.6                            | 47.4     | 3.3              | 43.1     |
| Women                                            | 6.0                            | 71.9     | 5.7              | 68.4     |
| 60+ years                                        |                                |          |                  |          |
| Men                                              | 6.4                            | 87.5     | 5.8              | 82.2     |
| Women                                            | 8.3                            | 105.4    | 7.2              | 95.7     |
| <b>Circulatory system (ATC-C)</b>                |                                |          |                  |          |
| 30-44 years                                      |                                |          |                  |          |
| Men                                              | 0.1                            | 3.3      | 0.1              | 2.9      |
| Women                                            | 0.2                            | 4.2      | 0.2              | 3.6      |
| 45-59 years                                      |                                |          |                  |          |
| Men                                              | 0.7                            | 12.6     | 0.6              | 10.6     |
| Women                                            | 0.8                            | 13.8     | 0.7              | 13.0     |
| 60+ years                                        |                                |          |                  |          |
| Men                                              | 1.9                            | 29.6     | 1.7              | 27.4     |
| Women                                            | 1.9                            | 30.0     | 1.6              | 26.7     |
| <b>Nervous system (ATC-N)</b>                    |                                |          |                  |          |
| 30-44 years                                      |                                |          |                  |          |
| Men                                              | 0.8                            | 9.8      | 0.7              | 8.6      |
| Women                                            | 1.1                            | 14.5     | 1.0              | 13.3     |
| 45-59 years                                      |                                |          |                  |          |
| Men                                              | 1.2                            | 14.6     | 1.2              | 13.9     |
| Women                                            | 2.1                            | 25.0     | 2.0              | 24.1     |
| 60+ years                                        |                                |          |                  |          |
| Men                                              | 1.8                            | 24.4     | 1.6              | 22.2     |
| Women                                            | 3.1                            | 39.2     | 2.7              | 35.8     |
| <b>Respiratory system (ATC-R)</b>                |                                |          |                  |          |
| 30-44 years                                      |                                |          |                  |          |
| Men                                              | 0.3                            | 3.9      | 0.3              | 3.6      |
| Women                                            | 0.6                            | 6.5      | 0.5              | 5.7      |
| 45-59 years                                      |                                |          |                  |          |
| Men                                              | 0.5                            | 5.8      | 0.4              | 5.0      |
| Women                                            | 0.8                            | 9.8      | 0.7              | 9.1      |
| 60+ years                                        |                                |          |                  |          |
| Men                                              | 1.1                            | 14.4     | 0.9              | 12.5     |
| Women                                            | 1.2                            | 14.8     | 1.0              | 12.8     |
| <b>Alimentary tract &amp; metabolism (ATC-A)</b> |                                |          |                  |          |
| 30-44 years                                      |                                |          |                  |          |
| Men                                              | 0.3                            | 3.5      | 0.2              | 3.1      |
| Women                                            | 0.4                            | 5.0      | 0.4              | 4.1      |
| 45-59 years                                      |                                |          |                  |          |
| Men                                              | 0.5                            | 7.6      | 0.5              | 6.6      |
| Women                                            | 0.7                            | 9.6      | 0.7              | 8.6      |
| 60+ years                                        |                                |          |                  |          |
| Men                                              | 1.1                            | 15.4     | 1.1              | 15.0     |
| Women                                            | 1.3                            | 18.3     | 1.0              | 16.4     |

1  
2  
3  
4  
5  
6  
7  
8 ATC-N drug prescriptions were the most frequently redeemed in the youngest age group. The mean number of  
9 prescription fillings in the twin population was similar to that in the population-based sample, although slightly  
10 higher in the population-based sample.  
11

12 In order to get a better idea of the clinical outcomes underlying the observed prescription patterns, we have  
13 included a more detailed description of the most incident types of drugs at the 3-and 4-digit ATC level  
14 (Supplementary table 1). From the table it appears that the ATC-C category primarily comprises drugs indicated  
15 for hypertension and ischaemic heart disease, while the ATC-N category mainly includes drugs indicated for a  
16 wide range of different diagnoses, including chronic pain disorders, insomnia, anxiety, psychoses, depression  
17 etc.[28] In the ATC-R category the main types of drugs are drugs for obstructive airway disease such as asthma  
18 and Chronic Obstructive Lung Disorder (COPD)[28]. Finally, drugs for acid-related disorders and diabetes are the  
19 main constituents of the ATC-A category.  
20  
21

22 The results of an analysis of the association between SEP and prescription fillings for all-purpose and system-  
23 specific drugs are presented in table 4.  
24  
25  
26  
27  
28  
29  
30  
31  
32  
33  
34  
35  
36  
37  
38  
39  
40  
41  
42  
43  
44  
45  
46  
47  
48  
49  
50  
51  
52  
53  
54



Table 4: The ratio (MR) of the mean number of prescription fillings (1995-2005) for all-purpose and system-specific drugs according to educational status and income in a 5% population-based sample (137 300) and a population of Danish twins (n=24 370), showing results from unpaired and intra-pair analyses stratified on zygosity.

| Type of drug                                     | Unpaired analysis <sup>a</sup> |             |              |             | Intra-pair analysis <sup>b</sup> |             |           |             |           |             |           |
|--------------------------------------------------|--------------------------------|-------------|--------------|-------------|----------------------------------|-------------|-----------|-------------|-----------|-------------|-----------|
|                                                  | Pop % n=137300                 |             | DZSS n=15788 |             | MZ n=8582                        |             | DZSS      |             | MZ        |             |           |
|                                                  | MR                             | CI 95%      | MR           | CI 95%      | MR                               | CI 95%      | MR        | CI 95%      | MR        | CI 95%      |           |
| <i>All purpose</i>                               |                                |             |              |             |                                  |             |           |             |           |             |           |
| Education                                        | Secondary                      | <b>0.90</b> | 0.90-0.90    | <b>0.90</b> | 0.86-0.95                        | <b>0.87</b> | 0.81-0.93 | <b>0.88</b> | 0.84-0.93 | 0.97        | 0.91-1.03 |
|                                                  | Tertiary                       | <b>0.82</b> | 0.82-0.83    | <b>0.85</b> | 0.80-0.91                        | <b>0.83</b> | 0.76-0.90 | <b>0.86</b> | 0.80-0.92 | 0.95        | 0.86-1.05 |
| Income                                           | 2nd quartile                   | <b>0.78</b> | 0.78-0.78    | <b>0.81</b> | 0.76-0.85                        | <b>0.81</b> | 0.75-0.88 | <b>0.86</b> | 0.82-0.91 | <b>0.91</b> | 0.85-0.97 |
|                                                  | 3rd quartile                   | <b>0.72</b> | 0.72-0.73    | <b>0.72</b> | 0.69-0.77                        | <b>0.74</b> | 0.69-0.80 | <b>0.79</b> | 0.75-0.83 | <b>0.87</b> | 0.81-0.94 |
|                                                  | 4th quartile                   | <b>0.70</b> | 0.70-0.70    | <b>0.71</b> | 0.67-0.75                        | <b>0.70</b> | 0.65-0.77 | <b>0.76</b> | 0.72-0.81 | <b>0.87</b> | 0.81-0.94 |
| <i>Circulatory system (ATC-C)</i>                |                                |             |              |             |                                  |             |           |             |           |             |           |
| Education                                        | Secondary                      | <b>0.95</b> | 0.95-0.96    | <b>0.92</b> | 0.85-0.99                        | <b>0.87</b> | 0.78-0.96 | <b>0.85</b> | 0.79-0.92 | <b>0.89</b> | 0.81-0.97 |
|                                                  | Tertiary                       | <b>0.79</b> | 0.79-0.80    | <b>0.78</b> | 0.71-0.87                        | <b>0.70</b> | 0.60-0.82 | <b>0.80</b> | 0.71-0.90 | 0.93        | 0.79-1.08 |
| Income                                           | 2nd quartile                   | <b>0.91</b> | 0.90-0.91    | <b>0.94</b> | 0.87-1.03                        | 0.94        | 0.84-1.06 | 1.08        | 0.99-1.17 | 0.95        | 0.87-1.05 |
|                                                  | 3rd quartile                   | <b>0.83</b> | 0.83-0.84    | <b>0.86</b> | 0.78-0.94                        | <b>0.86</b> | 0.76-0.97 | 0.97        | 0.89-1.06 | 0.98        | 0.89-1.08 |
|                                                  | 4th quartile                   | <b>0.79</b> | 0.79-0.79    | <b>0.82</b> | 0.74-0.90                        | <b>0.85</b> | 0.74-0.97 | 0.97        | 0.88-1.08 | 0.94        | 0.84-1.05 |
| <i>Nervous system (ATC-N)</i>                    |                                |             |              |             |                                  |             |           |             |           |             |           |
| Education                                        | Secondary                      | <b>0.80</b> | 0.80-0.80    | <b>0.87</b> | 0.79-0.96                        | <b>0.77</b> | 0.67-0.88 | <b>0.85</b> | 0.77-0.94 | 1.00        | 0.86-1.17 |
|                                                  | Tertiary                       | <b>0.71</b> | 0.71-0.71    | <b>0.77</b> | 0.67-0.88                        | <b>0.75</b> | 0.61-0.92 | <b>0.78</b> | 0.67-0.90 | 0.91        | 0.73-1.16 |
| Income                                           | 2nd quartile                   | <b>0.61</b> | 0.60-0.61    | <b>0.61</b> | 0.55-0.68                        | <b>0.60</b> | 0.52-0.70 | <b>0.68</b> | 0.61-0.75 | <b>0.75</b> | 0.67-0.87 |
|                                                  | 3rd quartile                   | <b>0.49</b> | 0.49-0.50    | <b>0.47</b> | 0.43-0.53                        | <b>0.47</b> | 0.39-0.56 | <b>0.54</b> | 0.48-0.61 | <b>0.59</b> | 0.50-0.70 |
|                                                  | 4th quartile                   | <b>0.44</b> | 0.44-0.44    | <b>0.45</b> | 0.40-0.51                        | <b>0.42</b> | 0.35-0.50 | <b>0.50</b> | 0.45-0.57 | <b>0.60</b> | 0.50-0.71 |
| <i>Respiratory system (ATC-R)</i>                |                                |             |              |             |                                  |             |           |             |           |             |           |
| Education                                        | Secondary                      | <b>0.86</b> | 0.85-0.86    | <b>0.77</b> | 0.67-0.87                        | <b>0.82</b> | 0.69-0.98 | <b>0.83</b> | 0.72-0.94 | 1.00        | 0.84-1.21 |
|                                                  | Tertiary                       | <b>0.81</b> | 0.80-0.81    | <b>0.79</b> | 0.68-0.92                        | <b>0.76</b> | 0.61-0.95 | <b>0.80</b> | 0.66-0.97 | 0.77        | 0.58-1.03 |
| Income                                           | 2nd quartile                   | <b>0.76</b> | 0.75-0.76    | <b>0.76</b> | 0.66-0.87                        | <b>0.79</b> | 0.65-0.98 | <b>0.86</b> | 0.75-0.99 | 1.04        | 0.86-1.25 |
|                                                  | 3rd quartile                   | <b>0.68</b> | 0.68-0.69    | <b>0.74</b> | 0.64-0.86                        | <b>0.69</b> | 0.57-0.85 | <b>0.85</b> | 0.73-0.98 | 1.02        | 0.84-1.24 |
|                                                  | 4th quartile                   | <b>0.63</b> | 0.63-0.63    | <b>0.69</b> | 0.59-0.81                        | <b>0.64</b> | 0.52-0.79 | <b>0.83</b> | 0.71-0.96 | 1.25        | 1.04-1.51 |
| <i>Alimentary tract &amp; metabolism (ATC-A)</i> |                                |             |              |             |                                  |             |           |             |           |             |           |
| Education                                        | Secondary                      | <b>0.84</b> | 0.84-0.84    | <b>0.85</b> | 0.77-0.94                        | <b>0.81</b> | 0.71-0.93 | <b>0.84</b> | 0.75-0.94 | 0.98        | 0.85-1.14 |
|                                                  | Tertiary                       | <b>0.68</b> | 0.67-0.68    | <b>0.72</b> | 0.62-0.83                        | <b>0.64</b> | 0.53-0.77 | <b>0.81</b> | 0.68-0.96 | 0.94        | 0.76-1.17 |
| Income                                           | 2nd quartile                   | <b>0.74</b> | 0.74-0.75    | <b>0.73</b> | 0.65-0.81                        | <b>0.83</b> | 0.72-0.96 | <b>0.85</b> | 0.76-0.96 | 0.88        | 0.77-1.01 |
|                                                  | 3rd quartile                   | <b>0.64</b> | 0.64-0.65    | <b>0.63</b> | 0.56-0.71                        | <b>0.77</b> | 0.66-0.90 | <b>0.77</b> | 0.68-0.87 | 0.87        | 0.75-1.02 |
|                                                  | 4th quartile                   | <b>0.61</b> | 0.61-0.61    | <b>0.60</b> | 0.53-0.68                        | <b>0.65</b> | 0.55-0.77 | <b>0.76</b> | 0.67-0.88 | 0.86        | 0.72-1.02 |

DZSS=Dizygotic same sex twins; MZ=Monozygotic twins; <sup>a</sup>Unpaired analysis treating twins as individuals while taking interdependence of observations within each individual and within twin pairs into account. The interpretation of MR is the ratio of the mean number of prescriptions at a given time of e.g. an individual with a secondary or tertiary education compared to a random individual with a primary education. MRs are adjusted for age and sex. Income and education are mutually adjusted, <sup>b</sup>Intra-pair analysis of twins by inclusion of a strata statement. The interpretation of MR is the ratio of the mean number of prescriptions at a given time of a twin with a secondary or tertiary education compared to its co-twin with a primary education. Bold typography indicates statistical significance at 5% level.

1  
2  
3  
4  
5  
6  
7  
8 For all-purpose drugs, MZ twins in the highest income quartile had a 30% lower mean number of prescription  
9 fillings than MZ twins in the lowest income quartile (MR=0.70 (CI 95%; 0.65,0.77)). Similarly, MZ twins with a  
10 tertiary education had 17% lower mean number of prescription fillings than twins with a primary education  
11 (MR=0.82 (CI 95%: 0.75,0.89)). The association was slightly less strong for ATC-C drugs while stronger  
12 associations could be observed for the other system-specific drugs, particularly for ATC-N. In the unpaired  
13 analyses, no large differences could be observed between MZ and DZSS twins and there was no strong evidence  
14 for an interaction between SEP and zygosity in the unpaired analysis (education:  $P=0.81$ , income:  $P=0.95$ ). In  
15 contrast, the effect of SEP was moderated by zygosity in the intra-pair analyses (education:  $P=0.02$ , income:  
16  $P=0.05$ ), suggesting a more attenuated effect of SEP in MZ twins than in DZSS twins: In MZ twins, generally no  
17 statistically significant effect of education could be observed, while income was still somewhat associated with  
18 all-purpose medication and quite strongly with ACT-N drugs. In DZSS twins, a minor or moderate attenuation  
19 could be observed, and all effect parameters were statistically significant, except for ATC-C drugs. In the  
20 population-based sample, the associations were similar to that in the overall twin population.

21  
22  
23  
24  
25  
26  
27  
28  
29 When using DDD (for all-purpose drugs) as outcome measure (table 5), results similar to the results based on  
30 number of prescription fillings were obtained, although the attenuation patterns in MZ twins were somewhat  
31 more clear in this analysis, showing no statistically significant associations with DDD of neither education nor  
32 income. In the analysis of number of prescriptions as a predictor of mortality we found a 60% increase in  
33 mortality rate during follow-up for a person who, on average, filled 1 prescription per month during the follow-  
34 up period compared to a person without any prescription fillings (HR=1.60 (95% CI: 1.25,2.05)).  
35  
36  
37  
38  
39  
40  
41  
42  
43  
44  
45  
46  
47  
48  
49  
50  
51  
52  
53  
54

**Table 5: Results from a Linear Regression Model Showing Number of Daily Defined Doses (DDD) for All-Purpose Drugs According to Educational Status and Income in a Population of Danish Twins (n=24370) Stratified on Zygosity. Results from Unpaired and Intra-Pair Analyses are Shown.**

| Educational status<br>Income | Unpaired analysis <sup>a</sup><br>DZSS n=15788 |           | MZ n=8582   |           | Intra-pair analysis <sup>b</sup><br>DZSS |           | MZ   |          |
|------------------------------|------------------------------------------------|-----------|-------------|-----------|------------------------------------------|-----------|------|----------|
|                              | DDD                                            | CI 95%    | DDD         | CI 95%    | DDD                                      | CI 95%    | DDD  | CI 95%   |
| Secondary                    | <b>-287</b>                                    | -397;-177 | <b>-289</b> | -440;-138 | <b>-245</b>                              | -399;-90  | -143 | -346;59  |
| Tertiary                     | <b>-404</b>                                    | -531;-277 | <b>-424</b> | -606;-243 | <b>-344</b>                              | -557;-131 | -152 | -440;136 |
| 2nd quartile                 | <b>-401</b>                                    | -541;-260 | <b>-275</b> | -463;-88  | <b>-219</b>                              | -383;-54  | 18   | -177;214 |
| 3rd quartile                 | <b>-541</b>                                    | -680;-402 | <b>-451</b> | -638;-263 | <b>-367</b>                              | -535;-198 | -83  | -287;121 |
| 4th quartile                 | <b>-505</b>                                    | -648;-363 | <b>-437</b> | -630;-243 | <b>-327</b>                              | -512;-142 | 16   | -209;242 |

DZSS=Dizygotic same sex twins; MZ=Monozygotic twins; <sup>a</sup>Unpaired analysis treating twins as individuals while taking interdependence of observations within each individual and within twin pairs into account. The interpretation of e.g. the education estimate is difference in the mean number of DDDs of an individual with a secondary or tertiary education compared to a random individual with a primary education. The estimates are adjusted for age and sex. Income and education are mutually adjusted <sup>b</sup>Intra-pair analysis of twins by inclusion of a fixed-effect statement. The interpretation of e.g. the education estimate is the difference in the mean number of DDDs of a twin with a secondary or tertiary education compared to its co-twin with a primary education. Bold typography indicates statistical significance at 5% level.

## DISCUSSION

### Summary of findings

In this large Danish twin population we demonstrated an inverse social gradient in fillings of prescription medicine for all-purpose and system-specific drugs. That is, a greater use of prescription medicine among those with a low SEP thus suggesting a worse health status of this group. Furthermore, the number of prescription fillings was shown to be associated with a greater risk of mortality. In the intra-pair analyses, where shared familial factors were controlled per design, the association between SEP and prescription fillings attenuated to a wide extent within MZ twins and statistically significantly less in DZSS twins. For education, there was generally no association with prescription fillings in the intra-pair analyses of MZ twins, except for drugs targeting the nervous system, while there was still some association of income with all-purpose medication and most system-specific drugs. However, no effect of income was seen in the intra-pair analyses when DDD were used as outcome measure. In spite of some variations between system-specific drugs, the overall pattern was the same as for all-purpose drugs, except for ATC-N drugs and to a lesser degree ATC-A drugs, which still showed some effect of SEP in the intra-pair analyses.

### Interpretation

The fact that the association was attenuated in the intra-pair analyses suggests that underlying factors shared by a pair of twins account for some of the observed association between SEP and prescription fillings. However, there may be a number of alternative or complementary explanations for this finding: Firstly, part of it is likely caused by measurement error. Measurement error is random and therefore not shared by twins. In the intra-pair analysis, variance due to shared factors is removed, and a relatively larger proportion of exposure variance is thus due to measurement error. This will result in increasing attenuation of parameter estimates in the intra-pair analyses[33]. However, since data come from official registers it can be expected that education and income have limited measurement error. Secondly, the behaviour of one twin could be affected by the behaviour of the other twin, i.e. 'social interaction' either by 'imitation' or 'differentiation'. The implications of a potential imitation could be smaller within-pair differences, which could be misinterpreted as confounding from underlying familial factors. This may be of some concern in this study since fillings of prescription medicine is likely to have a behavioural component. Another implication of the discordant twin pair approach is that only twin pairs who are discordant on exposure contribute with statistical information to the estimation of SEP-

1  
2  
3  
4  
5  
6  
7  
8 effects in the intra-pair analysis. This could potentially induce bias in the comparison of the unpaired and intra-  
9 pair analysis, since the two analyses are based only partly overlapping populations. Since MZ twins are less likely  
10 to be discordant, the selection bias may be most severe in MZ twins[34]. We examined this concern by restricting  
11 the unpaired analysis only to include groups with exposure-discordant twins. Results were similar to those of the  
12 main analysis in both MZ and DZ twins. A further issue relates to the fact that twins who are discordant on  
13 exposure are special in the sense that they, in spite of overlapping genes and rearing environment, differ in their  
14 SEP. Thus, unshared factors may explain these differences. This implies that the intra-pair analysis may still be  
15 confounded by unshared confounding factors, and that this confounding may be enforced in the intra-pair  
16 analysis[33]. Generally, confounding from unshared factors is thought to be more severe when confounders are  
17 less correlated than exposure[33]. This may or may not be true in our case, since we can only hypothesize on the  
18 correlation of unmeasured confounders. Nevertheless, the correlation of education and income (MZ=0.79,  
19 DZ=0.58 and MZ=0.49, DZ=0.33) are more or less of the same magnitude as phenotypes like cognitive ability[35]  
20 and BMI[36] which have previously been investigated using similar designs. In any case, as shown by Frisell et al.  
21 (2012) in order for increased confounding to explain the attenuation of the association observed in this study,  
22 the potential non-shared confounders would have to create a positive association between education and  
23 prescription fillings. In most cases, however, we would expect a negative association, although filling of  
24 prescription medicine is indeed a complex health outcome and it is theoretically possible for a confounder to  
25 have a dual effect on prescription fillings by 1) increasing the capability of getting the relevant prescriptions, e.g.  
26 due to more regular health checks or better understanding of symptoms 2) at the same time reducing the need  
27 for prescription fillings due to better health status. Nevertheless, in a Danish context health status does seem to  
28 be the main determinant of prescription medicine[10, 37, 38] and was clearly associated with mortality in this  
29 data. Thus, in the presence of non-shared confounding we would expect the net effect of any confounding to  
30 produce a negative association between education and prescription fillings resulting in bias away from the  
31 null[33], and therefore it could not explain the observed attenuation of effect in the intra-pair analyses observed  
32 in this study.

33  
34  
35  
36  
37  
38  
39  
40  
41  
42  
43  
44  
45  
46  
47  
48  
49 The finding of greatest attenuation in MZ twins is compatible with the scenario of genetic confounding described  
50 in the introduction. Since the genetic overlap is greater in MZ twins than DZSS twins, one would expect a larger  
51 attenuation in MZ twins, if genetic factors gave rise to the confounding. However, a number of other factors could  
52  
53  
54

1  
2  
3  
4  
5  
6  
7  
8 produce a greater attenuation in MZ twins: First of all, the aforementioned measurement error may be most  
9 pronounced in MZ twins, due to the fact that increasing correlation in exposure will result in a greater  
10 attenuation of intra-pair parameter estimates[33]. In addition, the comparison of strength of association  
11 between MZ and DZ twins to indicate the source of familial confounding relies on the equal environment  
12 assumption: That is, MZ and DZ twins share their environment equally. However, this assumption may be  
13 challenged, and if it does not hold, i.e. if MZ twins not only share their genes but also their environment more  
14 closely than DZ twins[39], shared environmental factors could also produce a greater attenuation of effect in MZ  
15 twins. However, the interplay between environment and genes is complex, and it is conceivable that the  
16 environment to a certain extent is shaped in response to the genetic dispositions of an individual. If, for instance,  
17 a genetically determined similar appearance of MZ twins also elicits a more similar treatment from their peers,  
18 then these similar environmental stimuli can also be ascribed to genetic factors[40].

19  
20  
21  
22  
23  
24  
25  
26  
27 Thus, although several factors may contribute to the observed attenuation of association between SEP and filling  
28 of prescription drugs in the intra-pair analyses and to the differences in strength of association between MZ and  
29 DZ twins, the findings suggest that a part of the observed social inequality in prescription fillings is explained by  
30 either genetic or environmental factors shared by twins.

31  
32  
33  
34  
35 The finding of a persistent association of particularly income with fillings of prescriptions for ATC-N drugs  
36 clearly stood out from the general results. We therefore carried out a post hoc subanalysis of specific categories  
37 of ATC-N drugs to test whether it were certain types of drugs driving the association. The analysis revealed that  
38 it was mainly for analgesics and psycholeptics that the association persisted, while the association was  
39 somewhat attenuated for psychoanaleptics (primarily antidepressants). This finding may support the notion of  
40 reverse causation, i.e. that health status influences SEP rather than the other way around, since it is likely that  
41 diagnoses such as chronic pain disorders, psychoses, anxiety and bipolar disorders associated with these types of  
42 drugs may affect the work ability and thus the income of a person. Income is much more sensitive to reverse  
43 causation than education, which is usually obtained early in life and remains constant once it is obtained.

44  
45  
46  
47  
48  
49  
50  
51 Existing literature  
52  
53  
54

1  
2  
3  
4  
5  
6  
7  
8 In this study we argue that fillings of all-purpose and system-specific drug prescriptions to some extent serve as  
9 an indicator of general health status and of conditions like ischaemic heart disease, hypertension, COPD, and  
10 diabetes. The finding of weaker effects of SEP, when underlying familial factors were taken into account, accords  
11 with a large part of the life course literature that supports the importance of early life factors in the aetiology of  
12 chronic disease in adulthood[41, 42].

13  
14  
15  
16 In addition, a number of previous twin and sibling studies have investigated the association between various  
17 SEP-indicators and health outcomes. While some studies have shown strong or some evidence of a causal effect  
18 of adult SEP[43-47] other suggest no or little effect of SEP, when familial factors have been adjusted for [48-52].  
19 Other studies show mixed results[21, 23-25, 47, 53-55]. However, the studies vary with respect to a number of  
20 important parameters hampering overall comparisons. Most importantly, investigated health outcomes differ  
21 and may have different aetiologies and show different social gradients and patterns of familial confounding, but  
22 even for specific health outcomes there is no clear picture of evidence. E.g. for mortality, two sibling-[45, 46] and  
23 two twin studies[21, 44] have investigated the association with education. Although all studies support some  
24 effect of education after controlling for shared family factors, important differences exist: The twin study by  
25 Madsen et al.(2010) demonstrated an effect of education within twins only in older cohorts of men, but not in  
26 younger men and not in women. The influence of shared family factors was thus suggested in the latter, but not  
27 in the first subgroup of this study. The two sibling studies also suggested some effect of shared family factors,  
28 while the twin study by Lundborg (2008) did not support any such effect. For self-rated health, the majority of  
29 the existing twin studies [24, 25, 54] have shown mixed results, although Osler et al. [47] and Lundborg[43] did  
30 find a statistically significant association between social class respective education and self-rated health in the  
31 intra-pair analyses. One important reason for the inconsistencies may be that many studies have suffered from  
32 power limitations in the intra-pair analyses due to a small number of events[21, 23, 25, 47, 54]. This is not a  
33 concern in this study, where almost all of the exposure discordant twins contributed with information to the  
34 intra-pair analyses, thus providing some of the most powerful twin results on social inequality in health to date.

#### 45 46 47 48 Strengths and limitations

49 The twin approach is clearly a strength of this study, since it makes it possible to adjust for unmeasured  
50 background factors shared by twins that may be underlying the association between SEP and health.

51 Furthermore, the large sample size and the long follow-up allow a great number of events to be analysed. In  
52

1  
2  
3  
4  
5  
6  
7  
8 addition, the use of population-based registers has the advantage of relatively little selection and measurement  
9 error in the study population. Finally, this study not only focuses on prescription medicine in general, but also on  
10 drugs targeting specific organ systems which may give us a better idea of potential mechanisms.

11  
12  
13  
14 Among study limitations is the fact that filling of prescription medicine is not a perfect measure of health status.  
15 We do, however, argue that the observed association with mortality and the inverse relationship with education  
16 and income likely reflect a greater need for medicine among people of lower SEP. In case that access to health  
17 care also plays a role, presumably favouring people of high SEP, the social gradient in health status in this study  
18 could be underestimated. Although data did not contain information on over-the-counter (OTC) medication, it  
19 only constitutes a minor part of the total drug consumption in Denmark[7], and since we were interested in  
20 drugs as an indicator of health status, it could be argued that the most valid approach is to focus on drugs that  
21 require a formal medical indication (i.e. prescription).

22  
23  
24  
25  
26  
27  
28  
29 As models for counting processes only allow one event at a time, the number of prescription fillings was defined  
30 as the main outcome of interest. Therefore, it was reassuring that the subanalysis on DDD led to similar results.

31  
32  
33  
34 Although the distribution of SEP-indicators and prescription fillings were not entirely identical in twins and the  
35 population-based sample, the associations between SEP and prescription fillings were indeed, which supports  
36 generalizability to the general population in line with previous studies that show that health and mortality in  
37 twins are similar to the background population[56, 57]. Furthermore, the fact that the analysis based only on  
38 discordant twin pairs show marginal results similar to those based on the total twin sample was reassuring.

#### 39 Conclusion and perspectives

40  
41  
42  
43  
44 In this study, based on a comprehensive twin cohort, we observed a social inequality in fillings of prescription  
45 medicine, showing fewer prescription fillings among people with high SEP. This association attenuated within  
46 twin pairs for most types of prescription-fillings, except those targeting the nervous system. The attenuation was  
47 most pronounced in MZ twins. Measurement error can contribute to the observed attenuation of association, but  
48 it is likely to account only for a minor fraction, considering the exposure and outcome measures in this study. As  
49 for potential non-shared confounding we would, if anything, expect it to bias the estimates away from the null.  
50  
51  
52  
53  
54



1  
2  
3  
4  
5  
6  
7  
8 We therefore interpret the findings as an indication that at least a part of the observed social inequality in  
9 prescription fillings is explained by shared familial factors. The implications of these findings are by no means a  
10 disqualification of SEP as a determinant of health, but rather an indication that family matters in the production  
11 of social health inequalities; most likely through early environment, and possibly also genetic factors.

12  
13  
14 Recognizing biological components and early life exposures as important explanatory factors may improve our  
15 understanding of the multifaceted aetiology of health inequalities over the life course and increase the potential  
16 for effective and targeted interventions.

## 17 **DISCUSSION**

18  
19  
20 In this large Danish twin population we demonstrated an inverse social gradient in fillings of prescription  
21 medicine for all-purpose and system-specific drugs. That is, a greater use of prescription medicine among those  
22 with a low SEP, in spite of their limited financial means, thus suggesting a worse health status of this group.

23  
24 These marginal findings are in accordance with previous Danish studies reporting an inverse social gradient in  
25 drug use[5, 6]. In the intra-pair analyses, where shared familial factors were controlled for per design, the  
26 association attenuated to a wide extent within MZ twins and somewhat less in DZSS twins. For education, there  
27 was generally no association with prescription fillings in MZ twins, except for drugs targeting the neurologic  
28 system. For income, there was still some association with all purpose and most system-specific drugs. However,  
29 no effect of income was seen in the intra-pair analyses when DDD were used as outcome measure. In spite of  
30 some variations between system-specific drugs, the overall pattern was the same as for all-purpose drugs, except  
31 for ATC-N drugs and to a lesser degree ATC-A drugs, which still showed some effect of SEP in the intra-pair  
32 analyses.

33  
34  
35  
36  
37  
38  
39  
40  
41  
42 The finding of greatest attenuation in MZ twins is compatible with the scenario of genetic confounding, since MZ  
43 twins are genetically identical in contrast to DZSS twins who share on average 50% of their segregating genes.

44  
45 However, a number of things should be kept in mind when interpreting these findings:

46  
47  
48 First of all, part of the observed attenuation is likely caused by measurement error. Measurement error is  
49 random and therefore not shared by twins. In the intra-pair analysis, variance due to shared factors is removed,  
50 and a relatively larger proportion of exposure variance is thus due to measurement error. This will result in  
51 increasing attenuation of parameter estimates in the intra-pair analyses with increasing correlation in  
52  
53  
54

1  
2  
3  
4  
5  
6  
7  
8 exposure[31], thus being most pronounced in MZ twins. However, using data from official registers it can be  
9 expected that education and income have very limited measurement error. In addition, the intra-pair correlation  
10 of education and income is not that different between MZ and DZ twins in this population and seems insufficient  
11 to explain the greater attenuation observed in MZ twins.  
12

13  
14  
15  
16 Twin studies generally rely on the equal environment assumption. That is, MZ and DZ twins share their  
17 environment equally. If this does not hold, i.e. if MZ twins not only share their genes but also their  
18 environment more closely than DZ twins[32], shared environmental factors could also produce a greater  
19 attenuation of effect in MZ twins.  
20

21  
22  
23  
24 In addition, twins' behaviours could be affected in reaction to each other, i.e. social interaction either by imitation  
25 or differentiation. The implications of a potential imitation could be smaller within-pair differences, which could  
26 be misinterpreted as confounding from underlying background factors. This may be of some concern in this  
27 study since fillings of prescription medicine is likely to have a behavioural component.  
28

29  
30  
31  
32 Another implication of the discordant twin pair approach is that only twin pairs who are discordant on exposure  
33 contribute with statistical information to the estimation of SEP-effects in the intra-pair analysis. This could  
34 potentially induce bias in the comparison of the unpaired and intra-pair analysis, since the two analyses are  
35 based on essentially different populations. Since MZ twins are less likely to be discordant, the selection bias may  
36 be most severe in MZ twins[33]. We examined this concern by restricting the unpaired analysis only to include  
37 groups with exposure-discordant twins. Results were similar in both MZ and DZ twins.  
38

39  
40  
41  
42  
43 A further issue relates to the fact that twins who are discordant on exposure are special in the sense that they, in  
44 spite of overlapping genes and rearing environment, differ in their SEP. Thus, unshared factors are likely to  
45 explain these differences. This implies that the intra-pair analysis may still be confounded by unshared  
46 confounding factors, and that this confounding may be enforced in the intra-pair analysis[31]. Generally,  
47 confounding from unshared factors is thought to be more severe when confounders are less correlated than  
48 exposure[31]. This may or may not be true in our case, since we can only hypothesize on the correlation of  
49 unmeasured confounders. Nevertheless, education and income are less correlated than phenotypes like cognitive  
50  
51  
52  
53  
54

1  
2  
3  
4  
5  
6  
7  
8 ability[34] and BMI[35] which have previously been investigated using similar designs. In any case, as shown by  
9 Frisell et al. (2012) in order for *increased* confounding to explain the *attenuation* of the association observed in  
10 this study, the potential non-shared confounders would have to create a positive association between education  
11 and prescription fillings. In most cases, however, we would expect a negative association, although filling of  
12 prescription medicine is indeed a complex health outcome and it is theoretically possible for a confounder to  
13 have a dual effect on prescription fillings by increasing the capability of getting the relevant prescriptions, while  
14 at the same time reducing the need for prescription fillings. Nevertheless, health status does seem to be the main  
15 determinant of prescription medicine[10, 36, 37] and was clearly associated with mortality in this data. Thus, in  
16 the presence of non-shared confounding we would expect the net effect of any confounding to produce a  
17 negative association between education and prescription fillings resulting in bias away from the null[31]. This  
18 could not explain the observed attenuation of effect in the intra-pair analyses observed in this study.  
19  
20  
21  
22  
23  
24  
25  
26

27 As mentioned earlier, fillings of prescription medicine is not a perfect measure for health status, but we argue  
28 that the observed inverse relationship with education and income likely reflects a greater need for medicine  
29 among people of lower SEP. In case that access to health care also plays a role, presumably favouring people of  
30 high SEP, the social gradient in health status in this study could be underestimated. Although data did not  
31 contain information on over-the-counter (OTC) medication, it only constitutes a small part of the total drug  
32 consumption in Denmark, and since we were interested in drugs as an indicator of health status, it could be  
33 argued that the most valid approach is to focus on drugs that require a formal medical indication (i.e.  
34 prescription).  
35  
36  
37  
38  
39  
40  
41

42 The finding of a persistent association with fillings of prescriptions for ATC-N drugs clearly stood out from the  
43 general results. The possible explanation for this could be reverse causation, i.e. that poor health status affects  
44 ones income and not the other way around. Income is much more sensitive to reverse causation than education,  
45 which is usually obtained early in life and remains constant once it is obtained. It is likely that health conditions  
46 requiring prescriptions for ATC-N drugs may affect the work ability and income of a person.  
47  
48  
49

50  
51 As models for counting processes only allow one event at a time, the number of prescription fillings was defined  
52 as the main outcome of interest. Therefore, it was reassuring that the subanalysis on DDD led to similar results.  
53  
54

1  
2  
3  
4  
5  
6  
7  
8  
9  
10 Although the distribution of SEP indicators and prescription fillings were not entirely identical in twins and the  
11 population-based sample, the associations between SEP and prescription fillings were indeed, which supports  
12 generalizability to the general population in line with previous studies that show that health and mortality in  
13 twins are similar to the background population[38, 39]. Furthermore, the fact that the analysis based only on  
14 discordant twin pairs show marginal results similar to those based on the total twin sample was reassuring.  
15  
16

17  
18  
19 In this study based on a comprehensive twin cohort we observed a social inequality in fillings of prescription  
20 medicine, showing fewer prescription fillings among people with high SEP. This association attenuated within  
21 twin pairs for most types of prescription fillings, except those targeting the neurologic system. The attenuation  
22 was most pronounced in MZ twins. Several explanations may account for these findings. Measurement error can  
23 contribute to the observed attenuation of association, but it is likely to account only for a small fraction,  
24 considering the exposure and outcome measures in this study. As for potential non-shared confounding we  
25 would, if anything, expect it to bias the estimates away from the null. We therefore interpret the findings of this  
26 study as an indication that at least a part of the observed social inequality in prescription fillings is explained by  
27 shared familial factors. Previous studies have investigated the association between various SEP indicators and  
28 health outcomes. However, most studies suffered from severe power limitations in the intra-pair analyses due to  
29 a small number of events[19, 21, 23, 40, 41]. This is not a concern in this study, where almost all of the 24 370  
30 twins contributed with information to the intra-pair analyses, thus providing some of the most powerful twin  
31 results on social inequality in health to date.  
32  
33  
34  
35  
36  
37  
38  
39  
40

#### 41 **COMPETING INTERESTS**

42 None.  
43  
44

#### 45 **FUNDING**

46 This work is supported by a grant from the VELUX Foundation (95-103-11419), a grant from the Danish Cancer  
47 Society (SU08001) and from the Danish council For Independent Research (social sciences, 09-06008). The  
48 funding bodies had no influence on the contents of this paper.  
49  
50  
51  
52  
53  
54

1  
2  
3  
4  
5  
6  
7  
8 Reference List

- 9  
10 1. Mackenbach JP, Stirbu I, Roskam AJ, et al. Socioeconomic inequalities in health in 22  
11 European countries. N Engl J Med 2008;358(23):2468-2481.  
12  
13  
14 2. Adler NE, Ostrove JM. Socioeconomic status and health: what we know and what we don't.  
15 Ann N Y Acad Sci 1999;896:3-15.  
16  
17  
18 3. Davey SG, Hart C, Hole D, et al. Education and occupational social class: which is the more  
19 important indicator of mortality risk? J Epidemiol Community Health 1998;52(3):153-160.  
20  
21  
22 4. Marmot M, Ryff CD, Bumpass LL, et al. Social inequalities in health: next questions and  
23 converging evidence. Soc Sci Med 1997;44(6):901-910.  
24  
25  
26 5. Ekholm O, Kjølner M, Davidsen M, Hesse U, Eriksen L, Christensen A. Sundhed og  
27 Sygelighed i Danmark & udviklingen siden 1987 [Danish Health and Morbidity survey and  
28  trends since 1987]. Copenhagen: National Institute of Public Health; 2006.  
29  
30  
31  
32 6. Gundgaard J. Income related inequality in prescription drugs in Denmark. Pharmacoepidemiol  
33 Drug Saf 2005;14(5):307-317.  
34  
35  
36 7. Danish Medicines Agency. Total sales of medicines in Denmark, 2008-2012. 2013.  
37  
38  
39  
40 8. Weitoft GR, Rosen M, Ericsson O, et al. Education and drug use in Sweden--a nationwide  
41 register-based study. Pharmacoepidemiol Drug Saf 2008;17(10):1020-1028.  
42  
43  
44  
45 9. Nielsen MW, Hansen EH, Rasmussen NK. Prescription and non-prescription medicine use in  
46 Denmark: association with socio-economic position. Eur J Clin Pharmacol 2003;59(8-9):677-  
47 684.  
48  
49  
50  
51  
52  
53  
54

10. [Lu CY, Barratt J, Vitry A, et al. Charlson and Rx-Risk comorbidity indices were predictive of mortality in the Australian health care setting. J Clin Epidemiol 2011;64\(2\):223-228.](#)
11. [Rosholm JU, Christensen K. Relationship between drug use and self-reported health in elderly Danes. Eur J Clin Pharmacol 1997;53\(3-4\):179-183.](#)
12. [Hershman DL, Simonoff PA, Frishman WH, et al. Drug utilization in the old old and how it relates to self-perceived health and all-cause mortality: results from the Bronx Aging Study. J Am Geriatr Soc 1995;43\(4\):356-360.](#)
13. [Wamala S, Merlo J, Bostrom G, et al. Socioeconomic disadvantage and primary non-adherence with medication in Sweden. Int J Qual Health Care 2007;19\(3\):134-140.](#)
14. [Wamala S, Merlo J, Bostrom G, et al. Perceived discrimination, socioeconomic disadvantage and refraining from seeking medical treatment in Sweden. J Epidemiol Community Health 2007;61\(5\):409-415.](#)
15. [Furu K, Straume B, Thelle DS. Legal drug use in a general population: association with gender, morbidity, health care utilization, and lifestyle characteristics. J Clin Epidemiol 1997;50\(3\):341-349.](#)
16. [Adler NE, Stewart J. Health disparities across the lifespan: meaning, methods, and mechanisms. Ann N Y Acad Sci 2010;1186:5-23.](#)
17. [Lichtenstein P, Harris JR, Pedersen NL, et al. Socioeconomic status and physical health, how are they related? An empirical study based on twins reared apart and twins reared together. Soc Sci Med 1993;36\(4\):441-450.](#)

- 1  
2  
3  
4  
5  
6  
7  
8 [18. Smith GD, Blane D, Bartley M. Explanations for socio-economic differentials in mortality. Evidence from Britain and elsewhere. European Journal of Public Health 1994;\(4\):131-144.](#)
- 9  
10  
11  
12 [19. Gilman SE, Loucks EB. Invited commentary: does the childhood environment influence the association between every x and every y in adulthood? Am J Epidemiol 2012;176\(8\):684-688.](#)
- 13  
14  
15  
16  
17 [20. Mackenbach JP. Genetics and health inequalities: hypotheses and controversies. J Epidemiol Community Health 2005;59\(4\):268-273.](#)
- 18  
19  
20  
21 [21. Madsen M, Andersen AM, Christensen K, et al. Does educational status impact adult mortality in Denmark? A twin approach. Am J Epidemiol 2010;172\(2\):225-234.](#)
- 22  
23  
24  
25  
26 [22. Behrman JR, Kohler HP, Jensen VM, et al. Does more schooling reduce hospitalization and delay mortality? New evidence based on Danish twins. Demography 2011;48\(4\):1347-1375.](#)
- 27  
28  
29  
30  
31 [23. Madsen M, Andersen PK, Gerster M, et al. Does the association of education with breast cancer replicate within twin pairs? A register-based study on Danish female twins. Br J Cancer 2011;104\(3\):520-523.](#)
- 32  
33  
34  
35  
36  
37 [24. Osler M, McGue M, Christensen K. Socioeconomic position and twins' health: a life-course analysis of 1266 pairs of middle-aged Danish twins. Int J Epidemiol 2007;36\(1\):77-83.](#)
- 38  
39  
40  
41  
42 [25. Fujiwara T, Kawachi I. Is education causally related to better health? A twin fixed-effect study in the USA. Int J Epidemiol 2009;38\(5\):1310-1322.](#)
- 43  
44  
45  
46  
47 [26. Institute For Statistics. ISCED 1997 International Standard Classification of Education. UNESCO; 2006.](#)
- 48  
49  
50  
51  
52  
53  
54  
55  
56  
57  
58  
59  
60

- 1  
2  
3  
4  
5  
6  
7  
8 [27. Organisation for Economic Co-operation and Development. The OECD list of social](#)  
9 [indicators. Organisation for Economic Co-operation and Development: 1982.](#)  
10  
11  
12 [28. Guidelines for ATC classification and DDD assignment. 13th edition. Oslo: WHO](#)  
13 [Collaboration Centre for Drug Statistics Methodology: 2010.](#)  
14  
15  
16  
17 [29. Skytthe A, Kyvik K, Holm NV, et al. The Danish Twin Registry: 127 birth cohorts of twins.](#)  
18 [Twin Res 2002;5\(5\):352-357.](#)  
19  
20  
21  
22 [30. Christiansen L, Frederiksen H, Schousboe K, et al. Age- and sex-differences in the validity of](#)  
23 [questionnaire-based zygosity in twins. Twin Res 2003;6\(4\):275-278.](#)  
24  
25  
26  
27 [31. Cook RJ, Lawless JF. Methods based on Counts and Rate Functions. The Statistical Analysis](#)  
28 [of Recurrent Events. New York: Springer: 2007.](#)  
29  
30  
31  
32 [32. Lin DY. Linear regression analysis of censored medical costs. Biostatistics 2000;1\(1\):35-47.](#)  
33  
34  
35 [33. Frisell T, Oberg S, Kuja-Halkola R, et al. Sibling comparison designs: bias from non-shared](#)  
36 [confounders and measurement error. Epidemiology 2012;23\(5\):713-720.](#)  
37  
38  
39 [34. Kaufman JS, Glymour MM. Splitting the differences: problems in using twin controls to study](#)  
40 [the effects of BMI on mortality. Epidemiology 2011;22\(1\):104-106.](#)  
41  
42  
43 [35. Frisell T, Pawitan Y, Langstrom N. Is the association between general cognitive ability and](#)  
44 [violent crime caused by family-level confounders? PLoS One 2012;7\(7\):e41783.](#)  
45  
46  
47  
48 [36. Carlsson S, Andersson T, de FU, et al. Body mass index and mortality: is the association](#)  
49 [explained by genetic factors? Epidemiology 2011;22\(1\):98-103.](#)  
50  
51  
52  
53  
54  
55  
56  
57  
58  
59  
60



- 1  
2  
3  
4  
5  
6  
7  
8 [37. Nielsen MW, Gundgaard J, Hansen EH, et al. Use of six main drug therapeutic groups across](#)  
9 [educational groups: self-reported survey and prescription records. J Clin Pharm Ther](#)  
10 [2005;30\(3\):259-269.](#)  
11  
12  
13  
14 [38. van Doorslaer E, Masseria C, Koolman X. Inequalities in access to medical care by income in](#)  
15 [developed countries. CMAJ 2006;174\(2\):177-183.](#)  
16  
17  
18  
19 [39. Horwitz AV, Videon TM, Schmitz MF, et al. Rethinking twins and environments: possible](#)  
20 [social sources for assumed genetic influences in twin research. J Health Soc Behav](#)  
21 [2003;44\(2\):111-129.](#)  
22  
23  
24  
25  
26 [40. Mitchell KS, Mazzeo SE, Bulik CM, et al. An investigation of a measure of twins' equal](#)  
27 [environments. Twin Res Hum Genet 2007;10\(6\):840-847.](#)  
28  
29  
30  
31 [41. Kuh D, Ben-Shlomo Y, susser E. A Life Course Approach to Chronic Disease Epidemiology.](#)  
32 [2nd ed. New York: Oxford University Press; 2004.](#)  
33  
34  
35  
36 [42. Galobardes B, Lynch JW, Smith GD. Is the association between childhood socioeconomic](#)  
37 [circumstances and cause-specific mortality established? Update of a systematic review. J](#)  
38 [Epidemiol Community Health 2008;62\(5\):387-390.](#)  
39  
40  
41  
42 [43. Lundborg P. The Health Returns to Education: What Can We Learn from Twins? IZA](#)  
43 [Discussion Paper 2008;\(3399\):1-32.](#)  
44  
45  
46  
47 [44. Lundborg P, Lyttkens CH, Nystedt P. Human Capital and Longevity. Evidence from 70,000](#)  
48 [MZ and DZ Twins. Lund University, Sweden.; 2011.](#)  
49  
50  
51  
52 [45. Sondergaard G, Mortensen L, Andersen P, Madsen M, Nybo Andersen A, Osler M. Does](#)  
53 [shared family background influence educational differences in mortality? 2011.](#)  
54

- 1  
2  
3  
4  
5  
6  
7  
8 [46. Naess O, Hoff DA, Lawlor D, et al. Education and adult cause-specific mortality--examining](#)  
9 [the impact of family factors shared by 871 367 Norwegian siblings. Int J Epidemiol](#)  
10 [2012;41\(6\):1683-1691.](#)  
11  
12  
13  
14 [47. Osler M, Madsen M, Nybo Andersen AM, et al. Do childhood and adult socioeconomic](#)  
15 [circumstances influence health and physical function in middle-age? Soc Sci Med](#)  
16 [2009;68\(8\):1425-1431.](#)  
17  
18  
19  
20  
21 [48. Mortensen LH. Socioeconomic inequality in birth weight and gestational age in Denmark](#)  
22 [1996-2007: using a family-based approach to explore alternative explanations. Soc Sci Med](#)  
23 [2013;76\(1\):1-7.](#)  
24  
25  
26  
27 [49. Lawlor DA, Clark H, Davey SG, et al. Childhood intelligence, educational attainment and](#)  
28 [adult body mass index: findings from a prospective cohort and within sibling-pairs analysis.](#)  
29 [Int J Obes \(Lond\) 2006;30\(12\):1758-1765.](#)  
30  
31  
32  
33  
34 [50. Gilman SE, Martin LT, Abrams DB, et al. Educational attainment and cigarette smoking: a](#)  
35 [causal association? Int J Epidemiol 2008;37\(3\):615-624.](#)  
36  
37  
38  
39 [51. Behrman JR, Kohler HP, Jensen VM, et al. Does more schooling reduce hospitalization and](#)  
40 [delay mortality? New evidence based on Danish twins. Demography 2011;48\(4\):1347-1375.](#)  
41  
42  
43 [52. Amin V, Behrman J, Spector TD. Does more schooling improve health behaviours and health](#)  
44 [outcomes? Evidence from UK twins. London: Royal Holloway, University of London; 2009.](#)  
45  
46  
47  
48 [53. Webbink D, Martin NG, Visscher PM. Does education reduce the probability of being](#)  
49 [overweight? Journal of Health Economics 2010;29\(1\):29-38.](#)  
50  
51  
52  
53  
54  
55  
56  
57  
58  
59  
60

- 1  
2  
3  
4  
5  
6  
7  
8 [54. Krieger N, Chen JT, Coull BA, et al. Lifetime socioeconomic position and twins' health: an](#)  
9 [analysis of 308 pairs of United States women twins. PLoS Med 2005;2\(7\):e162.](#)  
10  
11  
12 [55. Sondergaard G, Mortensen LH, Andersen AM, et al. Social inequality in breast, lung and](#)  
13 [colorectal cancers: a sibling approach. BMJ Open 2013;3\(3\).](#)  
14  
15  
16  
17 [56. Christensen K, Wienke A, Skytthe A, et al. Cardiovascular mortality in twins and the fetal](#)  
18 [origins hypothesis. Twin Res 2001;4\(5\):344-349.](#)  
19  
20  
21  
22 [57. Christensen K, Vaupel JW, Holm NV, et al. Mortality among twins after age 6: fetal origins](#)  
23 [hypothesis versus twin method. BMJ 1995;310\(6977\):432-436.](#)  
24  
25  
26  
27  
28  
29  
30  
31  
32  
33  
34  
35  
36  
37  
38  
39  
40  
41  
42  
43  
44  
45  
46  
47  
48  
49  
50  
51  
52  
53  
54
